# Supplementary material for: Structural basis for regulation of CELSR1 by a compact module in its extracellular region
Source: Springer Nature journal article supplement (doi:10.1038/s41467-025-59319-8), 2025-04-28
Supplement: MOESM2 [file 41467_2025_59319_MOESM2_ESM.pdf › 41467_2025_59319_MOESM2_ESM.pdf]

## **Description of Additional Supplementary Files**

**File name: Supplementary Data 1**

Description: Small Angle X-ray Data processing information for the CELSR1 ECR in No  $\text{CaCl}_2$ .

**File name: Supplementary Data 2**

Description: Small Angle X-ray Data processing information for the CELSR1 ECR in 1mM  $\text{CaCl}_2$ .
