# Supplementary material for: Structural basis for regulation of CELSR1 by a compact module in its extracellular region
Source: Springer Nature journal article supplement (doi:10.1038/s41467-025-59319-8), 2025-04-28
Supplement: MOESM4 [file 41467_2025_59319_MOESM4_ESM.pdf › 41467_2025_59319_MOESM4_ESM.pdf]

# DA03\_006 SAXS data overview

## Summary:

Data name(s): DA03\_006

Collection date(s): 2022-12-08 17:56

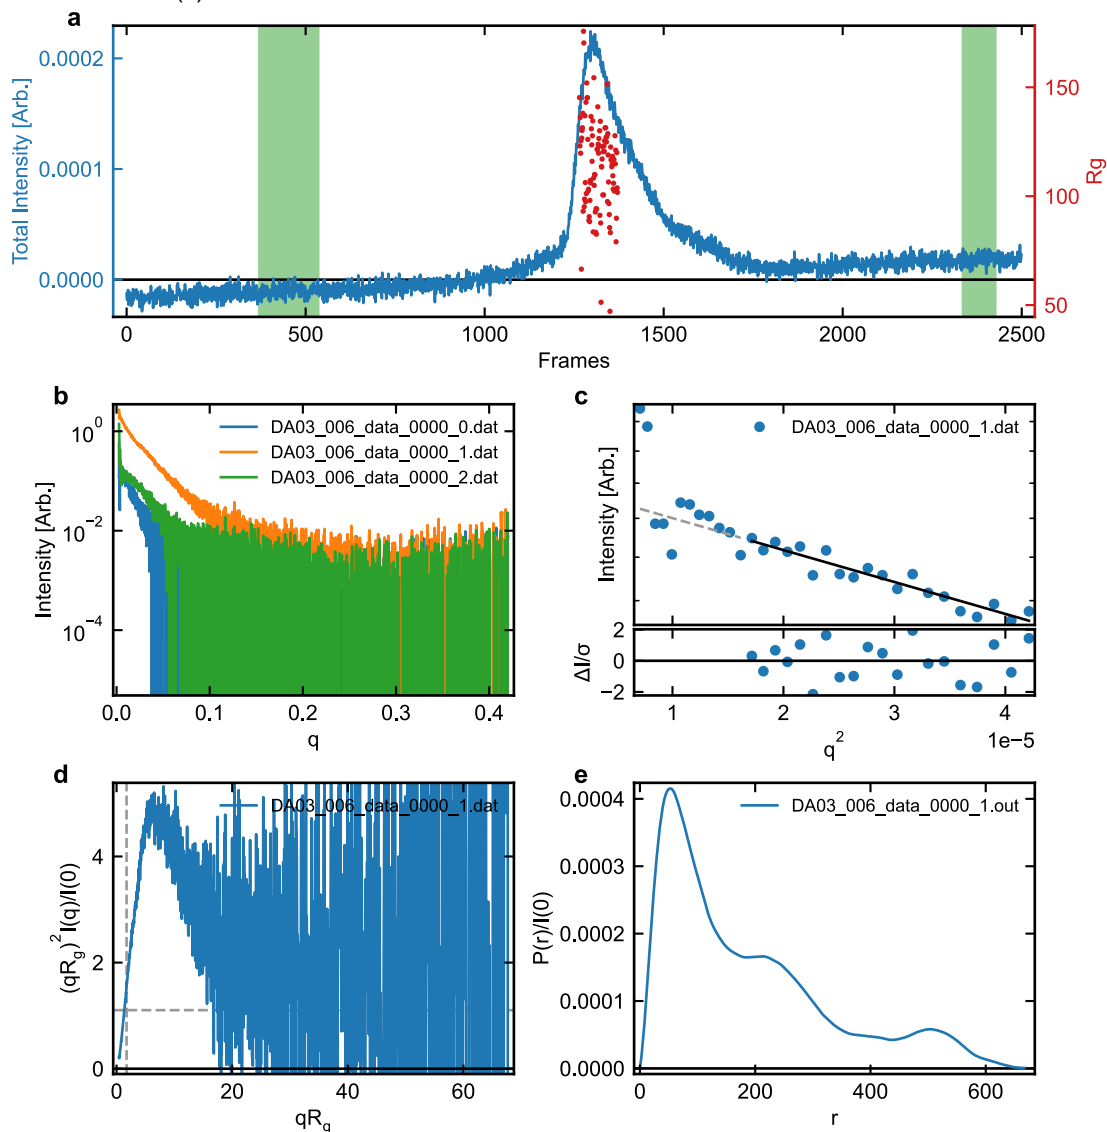

SAXS data summary figure for DA03\_006. a) Series intensity (blue, left axis) vs. frame, and, if available,  $R_g$  vs. frame (red, right axis). Green shaded regions are buffer regions, purple shaded regions are sample regions. b) Scattering profile(s) on a log-lin scale. c) Guinier fit(s) (top) and fit residuals (bottom). d) Dimensionless Kratky plot. Dashed lines show where a globular system would peak. e)  $P(r)$  function(s), normalized by  $I(0)$ .

|              | DA03_006_data_0000_0.dat | DA03_006_data_0000_1.dat | DA03_006_data_0000_2.dat |
|--------------|--------------------------|--------------------------|--------------------------|
| Guinier Rg   |                          | 1.61e+2 +/- 5.46         |                          |
| Guinier I(0) |                          | 2.18 +/- 0.04            |                          |
| M.W. (Vp)    |                          | 599.4                    |                          |
| M.W. (Vc)    |                          | 276.1                    |                          |
| M.W. (S&S)   |                          | -1.0e+0                  |                          |
| M.W. (Bayes) |                          | 318.4                    |                          |
| GNOM Dmax    |                          | 675.0                    |                          |
| GNOM Rg      |                          | 1.67e+2 +/- 3.76         |                          |
| GNOM I(0)    |                          | 2.15 +/- 0.03            |                          |

SAXS data summary table for DA03\_006.

## Experimental parameters:

|                       | DA03_006                                            |
|-----------------------|-----------------------------------------------------|
| Date                  | 2022-12-08 17:56                                    |
| Instrument            | BioCAT (Sector 18, APS)                             |
| Experiment Type       | SEC-MALS-SAXS                                       |
| Column                | Superose 6 10/300 Increase                          |
| Sample                | MC1 + CaCl <sub>2</sub>                             |
| Buffer                | 10 MM TRIS 8.5, 150 MM NaCl, 1 mM CaCl <sub>2</sub> |
| Temperature [C]       | 22                                                  |
| Loaded volume [uL]    | 250                                                 |
| Concentration [mg/ml] | 1.04                                                |
| Detector              | Eiger2 XE 9M                                        |
| Wavelength (A)        | 1.033                                               |
| Camera length (m)     | 3.682                                               |
| q-measurement range   | 0.0027 to 0.42                                      |
| Exposure time (s)     | 0.4                                                 |
| Exposure period (s)   | 1.0                                                 |
| Flow rate (ml/min)    | 0.6                                                 |
| Attenuation           | None                                                |
| RAW version           | 2.1.4                                               |
| Notes                 | Mismatched sheath (no CaCl <sub>2</sub> )           |

## Series:

|              |                          |
|--------------|--------------------------|
|              | DA03_006                 |
| Buffer range | 371 to 535, 2336 to 2426 |

## *EFA results:*

|                      |              |
|----------------------|--------------|
|                      | DA03_006     |
| EFA data range       | 1121 to 1659 |
| Number of components | 3            |
| Component 0          | 1124 to 1280 |
| Component 1          | 1230 to 1550 |
| Component 2          | 1500 to 1659 |

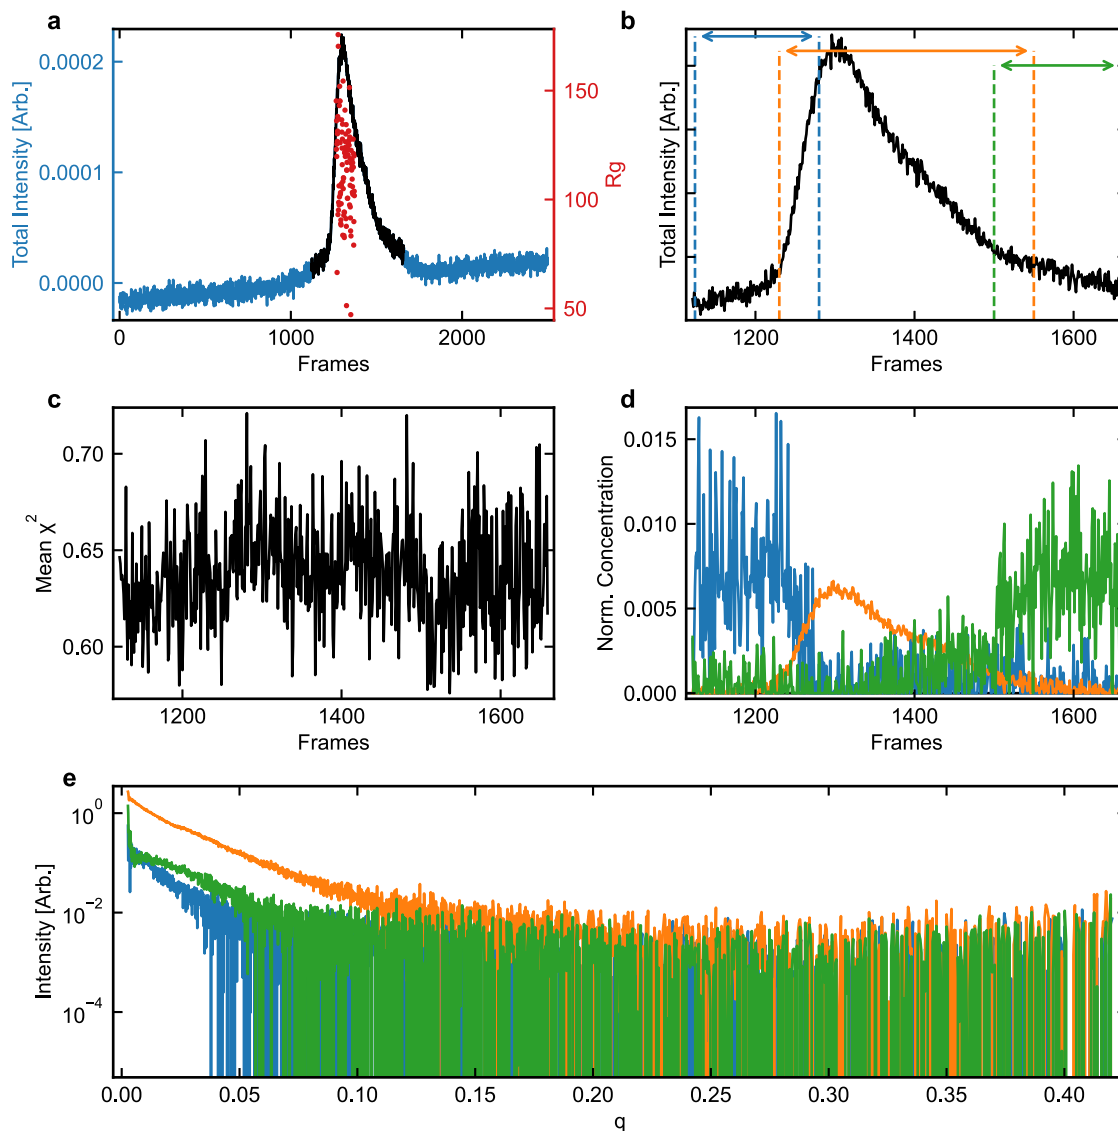

EFA deconvolution results. a) The full series intensity (blue), the selected intensity range for EFA (black), and (if available) Rg values (red). b) The selected intensity range for EFA (black), and the individual component ranges for deconvolution, with component range 0 starting at the top left, and component number increasing in descending order to the right. c) Mean  $\chi^2$  values between the fit of the EFA deconvolution and the original data. d) Area normalized concentration profiles for each component. Colors match the component range colors in b. e) Deconvolved scattering profiles. Colors match the component range colors in b and the concentration range colors in d.

## Guinier:

|             | DA03_006_data_0000_0<br>.dat | DA03_006_data_0000_1<br>.dat | DA03_006_data_0000_2<br>.dat |
|-------------|------------------------------|------------------------------|------------------------------|
| Rg          |                              | 1.61e+2 +/- 5.46             |                              |
| I(0) [Arb.] |                              | 2.18 +/- 0.04                |                              |
| q-range     |                              | 0.0041 to 0.0065             |                              |
| qmin*Rg     |                              | 0.667                        |                              |
| qmax*Rg     |                              | 1.046                        |                              |
| r^2         |                              | 0.899                        |                              |

## Molecular weight:

|                                    | DA03_006_data_0000<br>_0.dat | DA03_006_data_0000<br>_1.dat | DA03_006_data_0000<br>_2.dat |
|------------------------------------|------------------------------|------------------------------|------------------------------|
| M.W. (Vp) [kDa]                    |                              | 599.4                        |                              |
| Porod Volume                       |                              | 7.22e+5                      |                              |
| M.W. (Vc) [kDa]                    |                              | 276.1                        |                              |
| M.W. (S&S) [kDa]                   |                              | -1.0e+0                      |                              |
| Shape (S&S)                        |                              | unknown                      |                              |
| Dmax (S&S)                         |                              | -1.0e+0                      |                              |
| M.W. (Bayes) [kDa]                 |                              | 318.4                        |                              |
| Bayes Probability                  |                              | 99.9                         |                              |
| Bayes Confidence<br>Interval [kDa] |                              | 221.1 to 372.7               |                              |
| Bayes C.I. Prob.                   |                              | 99.9                         |                              |

## GNOM IFT:

|                 | DA03_006_data_0000_1.out                |
|-----------------|-----------------------------------------|
| Dmax            | 675.0                                   |
| Rg              | 1.67e+2 +/- 3.76                        |
| I(0)            | 2.15 +/- 0.03                           |
| Chi^2           | 1.188                                   |
| Total Estimate  | 0.638                                   |
| Quality         | a REASONABLE solution                   |
| q-range         | 0.0041 to 0.4203                        |
| Ambiguity score | 0.0                                     |
| Ambiguity cats. | 0                                       |
| Ambiguity       | 3D reconstruction is potentially unique |
