# Supplementary material for: Structural basis for regulation of CELSR1 by a compact module in its extracellular region
Source: Springer Nature journal article supplement (doi:10.1038/s41467-025-59319-8), 2025-04-28
Supplement: MOESM7 [file 41467_2025_59319_MOESM7_ESM.xlsx]

## Sheet: Fig. 3
	Fig. 3a
	Differential Refractive Index vs. Time
	Time (min)	No CaCl2	1 mM CaCl2
	15.0004	1.93229e-08	1.9203e-07
	15.0091	1.9337e-08	1.93023e-07
	15.0179	1.92689e-08	1.94196e-07
	15.0267	1.91403e-08	1.95215e-07
	15.0355	1.89811e-08	1.96533e-07
	15.0442	1.88218e-08	1.98038e-07
	15.053	1.86318e-08	1.99328e-07
	15.0618	1.87668e-08	2.00351e-07
	15.0705	1.86676e-08	2.01763e-07
	15.0793	1.85683e-08	2.03437e-07
	15.0881	1.8859e-08	2.04809e-07
	15.0969	1.91798e-08	2.06878e-07
	15.1056	1.94508e-08	2.08987e-07
	15.1144	2.00646e-08	2.10344e-07
	15.1232	2.00817e-08	2.12065e-07
	15.132	2.00987e-08	2.13918e-07
	15.1407	2.00619e-08	2.15624e-07
	15.1495	2.06762e-08	2.17982e-07
	15.1583	2.0988e-08	2.19909e-07
	15.167	2.12686e-08	2.21009e-07
	15.1758	2.16952e-08	2.22467e-07
	15.1846	2.18731e-08	2.24354e-07
	15.1934	2.21467e-08	2.26455e-07
	15.2021	2.26193e-08	2.28237e-07
	15.2109	2.31447e-08	2.29819e-07
	15.2197	2.30982e-08	2.31535e-07
	15.2284	2.32014e-08	2.33466e-07
	15.2372	2.3432e-08	2.35858e-07
	15.246	2.36059e-08	2.37872e-07
	15.2548	2.42999e-08	2.39185e-07
	15.2635	2.48559e-08	2.41114e-07
	15.2723	2.52458e-08	2.43303e-07
	15.2811	2.54062e-08	2.45659e-07
	15.2898	2.5464e-08	2.48116e-07
	15.2986	2.62404e-08	2.50065e-07
	15.3074	2.65233e-08	2.52552e-07
	15.3162	2.68062e-08	2.55172e-07
	15.3249	2.69944e-08	2.57349e-07
	15.3337	2.77258e-08	2.59722e-07
	15.3425	2.81686e-08	2.62046e-07
	15.3513	2.84678e-08	2.63984e-07
	15.36	2.87078e-08	2.66205e-07
	15.3688	2.91948e-08	2.68391e-07
	15.3776	2.96993e-08	2.7092e-07
	15.3863	3.00813e-08	2.73351e-07
	15.3951	3.04491e-08	2.75372e-07
	15.4039	3.07115e-08	2.77658e-07
	15.4127	3.11105e-08	2.79337e-07
	15.4214	3.11827e-08	2.81379e-07
	15.4302	3.14643e-08	2.84043e-07
	15.439	3.17034e-08	2.85837e-07
	15.4477	3.19124e-08	2.87895e-07
	15.4565	3.18741e-08	2.90557e-07
	15.4653	3.18358e-08	2.92805e-07
	15.4741	3.20967e-08	2.95245e-07
	15.4828	3.25587e-08	2.97691e-07
	15.4916	3.28908e-08	2.99758e-07
	15.5004	3.30336e-08	3.0207e-07
	15.5091	3.29595e-08	3.04469e-07
	15.5179	3.28853e-08	3.06522e-07
	15.5267	3.30546e-08	3.09015e-07
	15.5355	3.30472e-08	3.1151e-07
	15.5442	3.30397e-08	3.13404e-07
	15.553	3.32529e-08	3.15659e-07
	15.5618	3.31784e-08	3.18143e-07
	15.5706	3.31038e-08	3.20261e-07
	15.5793	3.29999e-08	3.22216e-07
	15.5881	3.28431e-08	3.24447e-07
	15.5969	3.26862e-08	3.26661e-07
	15.6056	3.2024e-08	3.28869e-07
	15.6144	3.19285e-08	3.31225e-07
	15.6232	3.17997e-08	3.33472e-07
	15.632	3.16569e-08	3.35205e-07
	15.6407	3.14033e-08	3.37318e-07
	15.6495	3.11497e-08	3.39809e-07
	15.6583	3.07852e-08	3.42e-07
	15.667	3.0237e-08	3.44804e-07
	15.6758	2.98418e-08	3.47258e-07
	15.6846	2.94467e-08	3.49151e-07
	15.6934	2.88503e-08	3.50958e-07
	15.7021	2.86092e-08	3.5309e-07
	15.7109	2.8368e-08	3.55817e-07
	15.7197	2.73019e-08	3.58028e-07
	15.7284	2.66355e-08	3.59632e-07
	15.7372	2.60514e-08	3.61836e-07
	15.746	2.51476e-08	3.64032e-07
	15.7548	2.4601e-08	3.65754e-07
	15.7635	2.43232e-08	3.68018e-07
	15.7723	2.40454e-08	3.70248e-07
	15.7811	2.22677e-08	3.7192e-07
	15.7899	2.16211e-08	3.74101e-07
	15.7986	2.08737e-08	3.76765e-07
	15.8074	1.98336e-08	3.78814e-07
	15.8162	1.94579e-08	3.80742e-07
	15.8249	1.87851e-08	3.82965e-07
	15.8337	1.77516e-08	3.85189e-07
	15.8425	1.739e-08	3.87647e-07
	15.8513	1.68859e-08	3.90223e-07
	15.86	1.60114e-08	3.9228e-07
	15.8688	1.56995e-08	3.94237e-07
	15.8776	1.49554e-08	3.9621e-07
	15.8863	1.40493e-08	3.98235e-07
	15.8951	1.37651e-08	4.00707e-07
	15.9039	1.26838e-08	4.03364e-07
	15.9127	1.14777e-08	4.05524e-07
	15.9214	1.03483e-08	4.07228e-07
	15.9302	9.29419e-09	4.09625e-07
	15.939	8.75357e-09	4.12051e-07
	15.9477	7.59176e-09	4.14315e-07
	15.9565	6.89818e-09	4.16292e-07
	15.9653	6.58877e-09	4.18134e-07
	15.9741	5.48165e-09	4.20336e-07
	15.9828	4.78346e-09	4.22429e-07
	15.9916	4.08183e-09	4.2496e-07
	16.0004	2.81041e-09	4.27264e-07
	16.0092	1.79644e-09	4.29435e-07
	16.0179	6.98551e-10	4.31352e-07
	16.0267	-4.70646e-10	4.33682e-07
	16.0355	-1.15526e-09	4.36543e-07
	16.0442	-1.58777e-09	4.38773e-07
	16.053	-2.13632e-09	4.40415e-07
	16.0618	-3.0627e-09	4.42478e-07
	16.0706	-4.3915e-09	4.45079e-07
	16.0793	-5.71438e-09	4.47261e-07
	16.0881	-6.51188e-09	4.49567e-07
	16.0969	-7.04717e-09	4.51915e-07
	16.1056	-7.98421e-09	4.5471e-07
	16.1144	-8.90912e-09	4.57227e-07
	16.1232	-9.4314e-09	4.59306e-07
	16.132	-1.00305e-08	4.61794e-07
	16.1407	-1.12769e-08	4.64332e-07
	16.1495	-1.20229e-08	4.66923e-07
	16.1583	-1.25031e-08	4.69238e-07
	16.167	-1.33464e-08	4.71473e-07
	16.1758	-1.37965e-08	4.73984e-07
	16.1846	-1.48641e-08	4.77014e-07
	16.1934	-1.57341e-08	4.79416e-07
	16.2021	-1.6414e-08	4.81466e-07
	16.2109	-1.69657e-08	4.84412e-07
	16.2197	-1.76197e-08	4.8753e-07
	16.2285	-1.84635e-08	4.90146e-07
	16.2372	-1.90306e-08	4.92749e-07
	16.246	-1.98379e-08	4.95089e-07
	16.2548	-2.01619e-08	4.97621e-07
	16.2635	-2.07167e-08	5.008e-07
	16.2723	-2.18324e-08	5.0391e-07
	16.2811	-2.23635e-08	5.07007e-07
	16.2899	-2.28206e-08	5.09548e-07
	16.2986	-2.3412e-08	5.12595e-07
	16.3074	-2.39949e-08	5.15354e-07
	16.3162	-2.45387e-08	5.18137e-07
	16.3249	-2.47202e-08	5.21263e-07
	16.3337	-2.57004e-08	5.24072e-07
	16.3425	-2.68207e-08	5.27025e-07
	16.3513	-2.75117e-08	5.30543e-07
	16.36	-2.77961e-08	5.33878e-07
	16.3688	-2.81189e-08	5.36657e-07
	16.3776	-2.90491e-08	5.39709e-07
	16.3863	-2.96562e-08	5.42941e-07
	16.3951	-3.01546e-08	5.46539e-07
	16.4039	-3.04255e-08	5.4998e-07
	16.4127	-3.06469e-08	5.53332e-07
	16.4214	-3.08683e-08	5.5653e-07
	16.4302	-3.16737e-08	5.59562e-07
	16.439	-3.25052e-08	5.63042e-07
	16.4478	-3.34488e-08	5.66915e-07
	16.4565	-3.36961e-08	5.70398e-07
	16.4653	-3.38265e-08	5.74535e-07
	16.4741	-3.40695e-08	5.78106e-07
	16.4828	-3.43126e-08	5.80899e-07
	16.4916	-3.5052e-08	5.84956e-07
	16.5004	-3.5315e-08	5.88627e-07
	16.5092	-3.56936e-08	5.92207e-07
	16.5179	-3.60541e-08	5.96081e-07
	16.5267	-3.64147e-08	5.99423e-07
	16.5355	-3.73305e-08	6.03416e-07
	16.5442	-3.75266e-08	6.07274e-07
	16.553	-3.79433e-08	6.10781e-07
	16.5618	-3.82917e-08	6.14787e-07
	16.5706	-3.87586e-08	6.18941e-07
	16.5793	-3.91138e-08	6.22958e-07
	16.5881	-3.92972e-08	6.2653e-07
	16.5969	-3.94806e-08	6.30604e-07
	16.6056	-3.97911e-08	6.34911e-07
	16.6144	-4.04081e-08	6.38721e-07
	16.6232	-4.07074e-08	6.42807e-07
	16.632	-4.08811e-08	6.47232e-07
	16.6407	-4.10548e-08	6.51493e-07
	16.6495	-4.12657e-08	6.55491e-07
	16.6583	-4.15171e-08	6.59764e-07
	16.6671	-4.17686e-08	6.64441e-07
	16.6758	-4.23012e-08	6.68548e-07
	16.6846	-4.25026e-08	6.72866e-07
	16.6934	-4.26838e-08	6.77361e-07
	16.7021	-4.3206e-08	6.81776e-07
	16.7109	-4.37089e-08	6.86022e-07
	16.7197	-4.42302e-08	6.90053e-07
	16.7285	-4.44664e-08	6.95106e-07
	16.7372	-4.45832e-08	7.00332e-07
	16.746	-4.47205e-08	7.04657e-07
	16.7548	-4.4871e-08	7.08946e-07
	16.7635	-4.50283e-08	7.13734e-07
	16.7723	-4.51855e-08	7.18913e-07
	16.7811	-4.56695e-08	7.24146e-07
	16.7899	-4.54954e-08	7.28774e-07
	16.7986	-4.55013e-08	7.33515e-07
	16.8074	-4.55091e-08	7.38341e-07
	16.8162	-4.56543e-08	7.42931e-07
	16.8249	-4.58063e-08	7.47639e-07
	16.8337	-4.59584e-08	7.52891e-07
	16.8425	-4.61111e-08	7.57811e-07
	16.8513	-4.63127e-08	7.6244e-07
	16.86	-4.65143e-08	7.67149e-07
	16.8688	-4.66968e-08	7.71939e-07
	16.8776	-4.66066e-08	7.77211e-07
	16.8864	-4.65225e-08	7.82061e-07
	16.8951	-4.65574e-08	7.86852e-07
	16.9039	-4.66673e-08	7.91567e-07
	16.9127	-4.68315e-08	7.96405e-07
	16.9214	-4.69958e-08	8.01747e-07
	16.9302	-4.72144e-08	8.07158e-07
	16.939	-4.70388e-08	8.12577e-07
	16.9478	-4.71303e-08	8.17275e-07
	16.9565	-4.72218e-08	8.22001e-07
	16.9653	-4.71799e-08	8.27397e-07
	16.9741	-4.69468e-08	8.32739e-07
	16.9828	-4.68549e-08	8.38357e-07
	16.9916	-4.67969e-08	8.43576e-07
	17.0004	-4.69204e-08	8.48697e-07
	17.0092	-4.70113e-08	8.54569e-07
	17.0179	-4.71661e-08	8.59714e-07
	17.0267	-4.7321e-08	8.64761e-07
	17.0355	-4.69956e-08	8.69878e-07
	17.0442	-4.69614e-08	8.74855e-07
	17.053	-4.70761e-08	8.80289e-07
	17.0618	-4.71908e-08	8.856e-07
	17.0706	-4.71112e-08	8.90931e-07
	17.0793	-4.71683e-08	8.96421e-07
	17.0881	-4.72884e-08	9.0178e-07
	17.0969	-4.75282e-08	9.07123e-07
	17.1057	-4.77681e-08	9.13048e-07
	17.1144	-4.77705e-08	9.1866e-07
	17.1232	-4.75659e-08	9.23783e-07
	17.132	-4.75787e-08	9.28825e-07
	17.1407	-4.7691e-08	9.33919e-07
	17.1495	-4.78033e-08	9.39356e-07
	17.1583	-4.77847e-08	9.45158e-07
	17.1671	-4.73091e-08	9.50992e-07
	17.1758	-4.71652e-08	9.56465e-07
	17.1846	-4.70795e-08	9.61706e-07
	17.1934	-4.70391e-08	9.67185e-07
	17.2021	-4.71935e-08	9.7302e-07
	17.2109	-4.70625e-08	9.78693e-07
	17.2197	-4.69063e-08	9.84327e-07
	17.2285	-4.67875e-08	9.89527e-07
	17.2372	-4.64912e-08	9.94861e-07
	17.246	-4.61409e-08	1.00081e-06
	17.2548	-4.61379e-08	1.00679e-06
	17.2635	-4.59196e-08	1.01244e-06
	17.2723	-4.59808e-08	1.01761e-06
	17.2811	-4.61182e-08	1.02336e-06
	17.2899	-4.62557e-08	1.02954e-06
	17.2986	-4.63188e-08	1.03523e-06
	17.3074	-4.64906e-08	1.04078e-06
	17.3162	-4.66624e-08	1.0464e-06
	17.325	-4.6551e-08	1.05176e-06
	17.3337	-4.60423e-08	1.0575e-06
	17.3425	-4.61969e-08	1.06376e-06
	17.3513	-4.63516e-08	1.07e-06
	17.36	-4.55105e-08	1.0758e-06
	17.3688	-4.55086e-08	1.0814e-06
	17.3776	-4.55067e-08	1.08752e-06
	17.3864	-4.56137e-08	1.09298e-06
	17.3951	-4.54342e-08	1.0989e-06
	17.4039	-4.49298e-08	1.10554e-06
	17.4127	-4.46139e-08	1.11122e-06
	17.4214	-4.42374e-08	1.11684e-06
	17.4302	-4.43642e-08	1.12276e-06
	17.439	-4.44911e-08	1.12894e-06
	17.4478	-4.42835e-08	1.13554e-06
	17.4565	-4.3813e-08	1.14151e-06
	17.4653	-4.35154e-08	1.14737e-06
	17.4741	-4.34075e-08	1.15342e-06
	17.4828	-4.33147e-08	1.15984e-06
	17.4916	-4.33619e-08	1.16656e-06
	17.5004	-4.27707e-08	1.17264e-06
	17.5092	-4.22742e-08	1.17875e-06
	17.5179	-4.21959e-08	1.18519e-06
	17.5267	-4.22493e-08	1.19182e-06
	17.5355	-4.2267e-08	1.19831e-06
	17.5443	-4.20158e-08	1.2049e-06
	17.553	-4.15987e-08	1.21145e-06
	17.5618	-4.09084e-08	1.21801e-06
	17.5706	-4.07855e-08	1.22415e-06
	17.5793	-4.0583e-08	1.23053e-06
	17.5881	-4.04768e-08	1.23734e-06
	17.5969	-4.01841e-08	1.24383e-06
	17.6057	-4.01499e-08	1.25049e-06
	17.6144	-4.01158e-08	1.25695e-06
	17.6232	-4.02098e-08	1.26362e-06
	17.632	-3.93118e-08	1.27035e-06
	17.6407	-3.89778e-08	1.27738e-06
	17.6495	-3.87811e-08	1.28399e-06
	17.6583	-3.86967e-08	1.29051e-06
	17.6671	-3.86124e-08	1.29772e-06
	17.6758	-3.82137e-08	1.30481e-06
	17.6846	-3.70798e-08	1.31159e-06
	17.6934	-3.69947e-08	1.31828e-06
	17.7021	-3.69097e-08	1.32526e-06
	17.7109	-3.66429e-08	1.33246e-06
	17.7197	-3.61569e-08	1.33965e-06
	17.7285	-3.58603e-08	1.34664e-06
	17.7372	-3.53955e-08	1.3538e-06
	17.746	-3.47727e-08	1.36111e-06
	17.7548	-3.45521e-08	1.36777e-06
	17.7636	-3.45317e-08	1.37499e-06
	17.7723	-3.39335e-08	1.3835e-06
	17.7811	-3.32218e-08	1.39068e-06
	17.7899	-3.33295e-08	1.39734e-06
	17.7986	-3.34373e-08	1.40435e-06
	17.8074	-3.26552e-08	1.41219e-06
	17.8162	-3.17107e-08	1.41986e-06
	17.825	-3.12382e-08	1.42687e-06
	17.8337	-3.02037e-08	1.43438e-06
	17.8425	-2.99552e-08	1.44215e-06
	17.8513	-2.96439e-08	1.44984e-06
	17.86	-2.8787e-08	1.45766e-06
	17.8688	-2.82531e-08	1.4662e-06
	17.8776	-2.73972e-08	1.47388e-06
	17.8864	-2.68938e-08	1.48131e-06
	17.8951	-2.68236e-08	1.48921e-06
	17.9039	-2.63326e-08	1.49728e-06
	17.9127	-2.53716e-08	1.5052e-06
	17.9214	-2.47249e-08	1.51315e-06
	17.9302	-2.43654e-08	1.52074e-06
	17.939	-2.38134e-08	1.52826e-06
	17.9478	-2.32253e-08	1.53681e-06
	17.9565	-2.26588e-08	1.54533e-06
	17.9653	-2.20489e-08	1.55334e-06
	17.9741	-2.10926e-08	1.56156e-06
	17.9829	-2.03339e-08	1.56949e-06
	17.9916	-1.99625e-08	1.57747e-06
	18.0004	-1.90981e-08	1.58636e-06
	18.0092	-1.80452e-08	1.59484e-06
	18.0179	-1.73896e-08	1.60368e-06
	18.0267	-1.69552e-08	1.61216e-06
	18.0355	-1.63072e-08	1.62049e-06
	18.0443	-1.5302e-08	1.62924e-06
	18.053	-1.46262e-08	1.63761e-06
	18.0618	-1.32556e-08	1.64644e-06
	18.0706	-1.28901e-08	1.65559e-06
	18.0793	-1.25246e-08	1.6646e-06
	18.0881	-1.21191e-08	1.67345e-06
	18.0969	-1.11672e-08	1.68243e-06
	18.1057	-1.00255e-08	1.69176e-06
	18.1144	-9.06337e-09	1.70131e-06
	18.1232	-8.61424e-09	1.71053e-06
	18.132	-8.03622e-09	1.71949e-06
	18.1407	-6.88295e-09	1.72887e-06
	18.1495	-6.17696e-09	1.73884e-06
	18.1583	-5.37718e-09	1.74831e-06
	18.1671	-4.46201e-09	1.7577e-06
	18.1758	-3.80731e-09	1.76729e-06
	18.1846	-2.95172e-09	1.77736e-06
	18.1934	-1.77846e-09	1.78819e-06
	18.2022	-8.42002e-10	1.79867e-06
	18.2109	-1.39546e-10	1.80876e-06
	18.2197	1.03515e-09	1.819e-06
	18.2285	2.19569e-09	1.82955e-06
	18.2372	3.13648e-09	1.84006e-06
	18.246	3.86326e-09	1.85056e-06
	18.2548	4.64975e-09	1.86129e-06
	18.2636	5.53392e-09	1.87237e-06
	18.2723	6.60413e-09	1.88361e-06
	18.2811	7.63716e-09	1.89509e-06
	18.2899	8.38468e-09	1.9066e-06
	18.2986	9.3672e-09	1.91823e-06
	18.3074	1.08244e-08	1.92961e-06
	18.3162	1.18934e-08	1.9412e-06
	18.325	1.28968e-08	1.95366e-06
	18.3337	1.41165e-08	1.96621e-06
	18.3425	1.48251e-08	1.97851e-06
	18.3513	1.58926e-08	1.99125e-06
	18.36	1.70628e-08	2.00492e-06
	18.3688	1.78873e-08	2.01818e-06
	18.3776	1.89774e-08	2.03175e-06
	18.3864	2.03571e-08	2.04579e-06
	18.3951	2.17842e-08	2.06031e-06
	18.4039	2.22962e-08	2.07496e-06
	18.4127	2.26515e-08	2.08928e-06
	18.4215	2.39747e-08	2.10474e-06
	18.4302	2.55002e-08	2.12099e-06
	18.439	2.71412e-08	2.13705e-06
	18.4478	2.85371e-08	2.15313e-06
	18.4565	2.9812e-08	2.17025e-06
	18.4653	3.07934e-08	2.18846e-06
	18.4741	3.17604e-08	2.207e-06
	18.4829	3.36284e-08	2.22629e-06
	18.4916	3.50779e-08	2.24645e-06
	18.5004	3.58935e-08	2.26723e-06
	18.5092	3.72476e-08	2.28936e-06
	18.5179	3.91114e-08	2.31297e-06
	18.5267	4.04389e-08	2.33705e-06
	18.5355	4.18993e-08	2.36243e-06
	18.5443	4.34325e-08	2.38937e-06
	18.553	4.47407e-08	2.41784e-06
	18.5618	4.6018e-08	2.44851e-06
	18.5706	4.73388e-08	2.48109e-06
	18.5793	4.9221e-08	2.51575e-06
	18.5881	5.06484e-08	2.55271e-06
	18.5969	5.24858e-08	2.59233e-06
	18.6057	5.48898e-08	2.63577e-06
	18.6144	5.63669e-08	2.68204e-06
	18.6232	5.7692e-08	2.73166e-06
	18.632	5.96562e-08	2.78525e-06
	18.6408	6.1453e-08	2.84205e-06
	18.6495	6.34345e-08	2.90428e-06
	18.6583	6.49009e-08	2.97135e-06
	18.6671	6.68925e-08	3.0427e-06
	18.6758	6.96182e-08	3.11968e-06
	18.6846	7.14642e-08	3.20253e-06
	18.6934	7.29847e-08	3.29123e-06
	18.7022	7.48206e-08	3.38621e-06
	18.7109	7.70462e-08	3.48811e-06
	18.7197	7.96992e-08	3.59709e-06
	18.7285	8.20722e-08	3.7127e-06
	18.7372	8.37827e-08	3.83572e-06
	18.746	8.58462e-08	3.96698e-06
	18.7548	8.819e-08	4.10581e-06
	18.7636	9.07786e-08	4.25221e-06
	18.7723	9.32799e-08	4.40692e-06
	18.7811	9.55666e-08	4.57011e-06
	18.7899	9.77672e-08	4.74164e-06
	18.7986	1.00373e-07	4.92165e-06
	18.8074	1.03396e-07	5.11066e-06
	18.8162	1.06e-07	5.3078e-06
	18.825	1.0815e-07	5.51287e-06
	18.8337	1.10786e-07	5.72682e-06
	18.8425	1.14028e-07	5.94902e-06
	18.8513	1.17317e-07	6.17977e-06
	18.8601	1.20494e-07	6.41747e-06
	18.8688	1.22964e-07	6.66259e-06
	18.8776	1.25578e-07	6.91564e-06
	18.8864	1.28827e-07	7.17537e-06
	18.8951	1.31801e-07	7.44289e-06
	18.9039	1.34932e-07	7.71718e-06
	18.9127	1.38828e-07	7.99609e-06
	18.9215	1.41795e-07	8.28167e-06
	18.9302	1.44516e-07	8.5731e-06
	18.939	1.48033e-07	8.86983e-06
	18.9478	1.51431e-07	9.17315e-06
	18.9565	1.55064e-07	9.48219e-06
	18.9653	1.58754e-07	9.81053e-06
	18.9741	1.61838e-07	1.01422e-05
	18.9829	1.64971e-07	1.04619e-05
	18.9916	1.68788e-07	1.07838e-05
	19.0004	1.72834e-07	1.11086e-05
	19.0092	1.76799e-07	1.1436e-05
	19.0179	1.80449e-07	1.17646e-05
	19.0267	1.84235e-07	1.20957e-05
	19.0355	1.8814e-07	1.24444e-05
	19.0443	1.92079e-07	1.28031e-05
	19.053	1.96455e-07	1.31528e-05
	19.0618	2.00639e-07	1.35135e-05
	19.0706	2.0453e-07	1.38711e-05
	19.0794	2.08752e-07	1.42065e-05
	19.0881	2.1304e-07	1.45382e-05
	19.0969	2.17495e-07	1.48678e-05
	19.1057	2.21728e-07	1.51945e-05
	19.1144	2.25922e-07	1.55205e-05
	19.1232	2.30581e-07	1.58447e-05
	19.132	2.3548e-07	1.6165e-05
	19.1408	2.40023e-07	1.64799e-05
	19.1495	2.44576e-07	1.67915e-05
	19.1583	2.49587e-07	1.71012e-05
	19.1671	2.54645e-07	1.74077e-05
	19.1758	2.59634e-07	1.771e-05
	19.1846	2.64387e-07	1.80082e-05
	19.1934	2.68834e-07	1.83022e-05
	19.2022	2.73227e-07	1.85912e-05
	19.2109	2.78824e-07	1.88748e-05
	19.2197	2.84414e-07	1.9154e-05
	19.2285	2.89286e-07	1.94285e-05
	19.2372	2.94403e-07	1.96964e-05
	19.246	2.99499e-07	1.99591e-05
	19.2548	3.04733e-07	2.0216e-05
	19.2636	3.0988e-07	2.04668e-05
	19.2723	3.1505e-07	2.07119e-05
	19.2811	3.20429e-07	2.09506e-05
	19.2899	3.26091e-07	2.11826e-05
	19.2987	3.31752e-07	2.14078e-05
	19.3074	3.37415e-07	2.16274e-05
	19.3162	3.43263e-07	2.18411e-05
	19.325	3.49033e-07	2.20478e-05
	19.3337	3.54597e-07	2.22475e-05
	19.3425	3.59808e-07	2.24401e-05
	19.3513	3.65255e-07	2.26259e-05
	19.3601	3.71175e-07	2.28056e-05
	19.3688	3.77426e-07	2.29783e-05
	19.3776	3.83409e-07	2.31437e-05
	19.3864	3.89086e-07	2.33023e-05
	19.3951	3.95041e-07	2.34543e-05
	19.4039	4.00953e-07	2.35997e-05
	19.4127	4.07053e-07	2.37386e-05
	19.4215	4.13338e-07	2.387e-05
	19.4302	4.19517e-07	2.39939e-05
	19.439	4.2493e-07	2.41118e-05
	19.4478	4.30191e-07	2.42236e-05
	19.4565	4.3656e-07	2.43283e-05
	19.4653	4.42469e-07	2.44267e-05
	19.4741	4.48736e-07	2.45189e-05
	19.4829	4.55112e-07	2.46043e-05
	19.4916	4.61301e-07	2.46838e-05
	19.5004	4.67664e-07	2.47573e-05
	19.5092	4.73636e-07	2.48251e-05
	19.518	4.79823e-07	2.48862e-05
	19.5267	4.8574e-07	2.49409e-05
	19.5355	4.91887e-07	2.49905e-05
	19.5443	4.98166e-07	2.50355e-05
	19.553	5.04586e-07	2.50743e-05
	19.5618	5.10917e-07	2.51068e-05
	19.5706	5.16961e-07	2.5134e-05
	19.5794	5.23286e-07	2.51563e-05
	19.5881	5.29772e-07	2.51734e-05
	19.5969	5.36264e-07	2.51851e-05
	19.6057	5.42616e-07	2.51886e-05
	19.6144	5.49131e-07	2.51901e-05
	19.6232	5.55843e-07	2.51875e-05
	19.632	5.62064e-07	2.51848e-05
	19.6408	5.68024e-07	2.51736e-05
	19.6495	5.74436e-07	2.51578e-05
	19.6583	5.81589e-07	2.51374e-05
	19.6671	5.88209e-07	2.51129e-05
	19.6758	5.9453e-07	2.5084e-05
	19.6846	6.01079e-07	2.50517e-05
	19.6934	6.07814e-07	2.50156e-05
	19.7022	6.14489e-07	2.49757e-05
	19.7109	6.21595e-07	2.49323e-05
	19.7197	6.28524e-07	2.48847e-05
	19.7285	6.34799e-07	2.48342e-05
	19.7373	6.41973e-07	2.47808e-05
	19.746	6.49172e-07	2.47242e-05
	19.7548	6.56224e-07	2.46641e-05
	19.7636	6.63001e-07	2.46012e-05
	19.7723	6.69993e-07	2.45356e-05
	19.7811	6.77147e-07	2.44673e-05
	19.7899	6.84256e-07	2.43971e-05
	19.7987	6.91867e-07	2.43238e-05
	19.8074	6.99079e-07	2.42477e-05
	19.8162	7.06387e-07	2.41698e-05
	19.825	7.13998e-07	2.40895e-05
	19.8337	7.21418e-07	2.40065e-05
	19.8425	7.29045e-07	2.39221e-05
	19.8513	7.37331e-07	2.38357e-05
	19.8601	7.44841e-07	2.3747e-05
	19.8688	7.51732e-07	2.36574e-05
	19.8776	7.59199e-07	2.35654e-05
	19.8864	7.66988e-07	2.34711e-05
	19.8951	7.7513e-07	2.33762e-05
	19.9039	7.8318e-07	2.32796e-05
	19.9127	7.9056e-07	2.31811e-05
	19.9215	7.9846e-07	2.30817e-05
	19.9302	8.0713e-07	2.29807e-05
	19.939	8.1559e-07	2.28786e-05
	19.9478	8.24425e-07	2.27757e-05
	19.9566	8.32767e-07	2.26716e-05
	19.9653	8.40413e-07	2.25665e-05
	19.9741	8.49589e-07	2.24609e-05
	19.9829	8.59422e-07	2.23541e-05
	19.9916	8.68476e-07	2.22465e-05
	20.0004	8.77301e-07	2.21385e-05
	20.0092	8.86552e-07	2.20299e-05
	20.018	8.95745e-07	2.19199e-05
	20.0267	9.04839e-07	2.18097e-05
	20.0355	9.14791e-07	2.1699e-05
	20.0443	9.247e-07	2.15876e-05
	20.053	9.34287e-07	2.14761e-05
	20.0618	9.43984e-07	2.13645e-05
	20.0706	9.54364e-07	2.12519e-05
	20.0794	9.64269e-07	2.1139e-05
	20.0881	9.74282e-07	2.10263e-05
	20.0969	9.84586e-07	2.09133e-05
	20.1057	9.94764e-07	2.07999e-05
	20.1144	1.00561e-06	2.06861e-05
	20.1232	1.01658e-06	2.05728e-05
	20.132	1.02759e-06	2.04595e-05
	20.1408	1.03883e-06	2.03458e-05
	20.1495	1.05013e-06	2.02319e-05
	20.1583	1.06147e-06	2.01184e-05
	20.1671	1.07304e-06	2.0005e-05
	20.1759	1.08483e-06	1.98917e-05
	20.1846	1.09683e-06	1.97786e-05
	20.1934	1.10853e-06	1.96658e-05
	20.2022	1.12083e-06	1.95529e-05
	20.2109	1.13365e-06	1.94404e-05
	20.2197	1.14605e-06	1.93282e-05
	20.2285	1.15879e-06	1.92165e-05
	20.2373	1.17125e-06	1.91041e-05
	20.246	1.184e-06	1.89921e-05
	20.2548	1.19795e-06	1.8881e-05
	20.2636	1.21121e-06	1.87694e-05
	20.2723	1.22423e-06	1.86586e-05
	20.2811	1.23796e-06	1.85485e-05
	20.2899	1.25187e-06	1.8439e-05
	20.2987	1.26569e-06	1.83296e-05
	20.3074	1.28011e-06	1.82201e-05
	20.3162	1.29473e-06	1.81112e-05
	20.325	1.30904e-06	1.8003e-05
	20.3337	1.3238e-06	1.78958e-05
	20.3425	1.3387e-06	1.7789e-05
	20.3513	1.35405e-06	1.76831e-05
	20.3601	1.36966e-06	1.75779e-05
	20.3688	1.38557e-06	1.74725e-05
	20.3776	1.40113e-06	1.73676e-05
	20.3864	1.4168e-06	1.72636e-05
	20.3952	1.43331e-06	1.71601e-05
	20.4039	1.45001e-06	1.70573e-05
	20.4127	1.46676e-06	1.6955e-05
	20.4215	1.48287e-06	1.6853e-05
	20.4302	1.50175e-06	1.67521e-05
	20.439	1.52165e-06	1.66524e-05
	20.4478	1.54907e-06	1.65559e-05
	20.4566	1.58864e-06	1.6469e-05
	20.4653	1.62117e-06	1.63699e-05
	20.4741	1.64151e-06	1.62625e-05
	20.4829	1.65952e-06	1.61654e-05
	20.4916	1.6783e-06	1.60688e-05
	20.5004	1.69706e-06	1.59735e-05
	20.5092	1.71588e-06	1.58785e-05
	20.518	1.73507e-06	1.57841e-05
	20.5267	1.75425e-06	1.56903e-05
	20.5355	1.77379e-06	1.55972e-05
	20.5443	1.7935e-06	1.55052e-05
	20.553	1.81324e-06	1.54138e-05
	20.5618	1.8334e-06	1.53229e-05
	20.5706	1.85373e-06	1.5233e-05
	20.5794	1.87426e-06	1.51439e-05
	20.5881	1.89451e-06	1.50554e-05
	20.5969	1.91587e-06	1.4967e-05
	20.6057	1.93716e-06	1.48793e-05
	20.6145	1.95754e-06	1.47931e-05
	20.6232	1.97892e-06	1.47074e-05
	20.632	2.00072e-06	1.46229e-05
	20.6408	2.0227e-06	1.45389e-05
	20.6495	2.04457e-06	1.44547e-05
	20.6583	2.06656e-06	1.43715e-05
	20.6671	2.08887e-06	1.42901e-05
	20.6759	2.11111e-06	1.42092e-05
	20.6846	2.1337e-06	1.41291e-05
	20.6934	2.15682e-06	1.40496e-05
	20.7022	2.17993e-06	1.39707e-05
	20.7109	2.20268e-06	1.38929e-05
	20.7197	2.2258e-06	1.38155e-05
	20.7285	2.2495e-06	1.37391e-05
	20.7373	2.27304e-06	1.36504e-05
	20.746	2.29667e-06	1.3552e-05
	20.7548	2.32023e-06	1.34597e-05
	20.7636	2.34445e-06	1.33791e-05
	20.7723	2.36844e-06	1.33072e-05
	20.7811	2.39247e-06	1.32353e-05
	20.7899	2.41712e-06	1.31643e-05
	20.7987	2.44714e-06	1.30943e-05
	20.8074	2.48646e-06	1.30248e-05
	20.8162	2.5277e-06	1.29567e-05
	20.825	2.55984e-06	1.28892e-05
	20.8338	2.58454e-06	1.28219e-05
	20.8425	2.60924e-06	1.27559e-05
	20.8513	2.63383e-06	1.26909e-05
	20.8601	2.66343e-06	1.2625e-05
	20.8688	2.69489e-06	1.25404e-05
	20.8776	2.72316e-06	1.24524e-05
	20.8864	2.74942e-06	1.23842e-05
	20.8952	2.77379e-06	1.23225e-05
	20.9039	2.79868e-06	1.22617e-05
	20.9127	2.82389e-06	1.2202e-05
	20.9215	2.84873e-06	1.21429e-05
	20.9302	2.87345e-06	1.20843e-05
	20.939	2.89791e-06	1.20272e-05
	20.9478	2.92257e-06	1.19704e-05
	20.9566	2.94736e-06	1.19141e-05
	20.9653	2.97184e-06	1.18594e-05
	20.9741	2.99604e-06	1.18051e-05
	20.9829	3.02016e-06	1.17513e-05
	20.9916	3.04451e-06	1.16986e-05
	21.0004	3.0685e-06	1.16466e-05
	21.0092	3.09218e-06	1.15953e-05
	21.018	3.116e-06	1.15445e-05
	21.0267	3.13952e-06	1.14948e-05
	21.0355	3.16266e-06	1.14461e-05
	21.0443	3.18628e-06	1.13976e-05
	21.0531	3.20978e-06	1.135e-05
	21.0618	3.23239e-06	1.13036e-05
	21.0706	3.25535e-06	1.12576e-05
	21.0794	3.27797e-06	1.1212e-05
	21.0881	3.29952e-06	1.11677e-05
	21.0969	3.32165e-06	1.11242e-05
	21.1057	3.34393e-06	1.10812e-05
	21.1145	3.36568e-06	1.10386e-05
	21.1232	3.38711e-06	1.09966e-05
	21.132	3.40766e-06	1.09557e-05
	21.1408	3.42841e-06	1.09157e-05
	21.1495	3.44965e-06	1.08764e-05
	21.1583	3.46998e-06	1.08373e-05
	21.1671	3.48975e-06	1.07985e-05
	21.1759	3.50942e-06	1.07603e-05
	21.1846	3.52877e-06	1.0723e-05
	21.1934	3.54743e-06	1.06867e-05
	21.2022	3.56631e-06	1.06509e-05
	21.2109	3.58514e-06	1.06153e-05
	21.2197	3.60297e-06	1.05805e-05
	21.2285	3.62062e-06	1.05462e-05
	21.2373	3.63771e-06	1.05125e-05
	21.246	3.65462e-06	1.04798e-05
	21.2548	3.67147e-06	1.0447e-05
	21.2636	3.68831e-06	1.04144e-05
	21.2724	3.7041e-06	1.03826e-05
	21.2811	3.71922e-06	1.03515e-05
	21.2899	3.73474e-06	1.03213e-05
	21.2987	3.74995e-06	1.02913e-05
	21.3074	3.76398e-06	1.02614e-05
	21.3162	3.7773e-06	1.02322e-05
	21.325	3.79082e-06	1.02037e-05
	21.3338	3.80361e-06	1.01752e-05
	21.3425	3.81609e-06	1.01473e-05
	21.3513	3.82826e-06	1.01201e-05
	21.3601	3.83969e-06	1.00927e-05
	21.3688	3.85136e-06	1.00658e-05
	21.3776	3.8625e-06	1.00393e-05
	21.3864	3.8723e-06	1.00134e-05
	21.3952	3.8821e-06	9.98767e-06
	21.4039	3.89114e-06	9.96193e-06
	21.4127	3.9e-06	9.93577e-06
	21.4215	3.90873e-06	9.91039e-06
	21.4302	3.91633e-06	9.88574e-06
	21.439	3.92418e-06	9.86108e-06
	21.4478	3.93155e-06	9.83301e-06
	21.4566	3.9375e-06	9.79975e-06
	21.4653	3.94352e-06	9.76862e-06
	21.4741	3.94989e-06	9.73912e-06
	21.4829	3.95515e-06	9.70757e-06
	21.4917	3.95977e-06	9.67958e-06
	21.5004	3.96421e-06	9.65526e-06
	21.5092	3.96845e-06	9.63188e-06
	21.518	3.97253e-06	9.6086e-06
	21.5267	3.97619e-06	9.58469e-06
	21.5355	3.97924e-06	9.56078e-06
	21.5443	3.9815e-06	9.53672e-06
	21.5531	3.9833e-06	9.51311e-06
	21.5618	3.98474e-06	9.48958e-06
	21.5706	3.98592e-06	9.46578e-06
	21.5794	3.98708e-06	9.44181e-06
	21.5881	3.98759e-06	9.41757e-06
	21.5969	3.98751e-06	9.39356e-06
	21.6057	3.98736e-06	9.36918e-06
	21.6145	3.98718e-06	9.34462e-06
	21.6232	3.987e-06	9.3203e-06
	21.632	3.98595e-06	9.29583e-06
	21.6408	3.98493e-06	9.2706e-06
	21.6495	3.9832e-06	9.24492e-06
	21.6583	3.9812e-06	9.22007e-06
	21.6671	3.97885e-06	9.1946e-06
	21.6759	3.97631e-06	9.16871e-06
	21.6846	3.97419e-06	9.14241e-06
	21.6934	3.97145e-06	9.11585e-06
	21.7022	3.96812e-06	9.08953e-06
	21.711	3.96464e-06	9.06246e-06
	21.7197	3.96139e-06	9.03524e-06
	21.7285	3.95801e-06	9.00724e-06
	21.7373	3.95373e-06	8.97871e-06
	21.746	3.9497e-06	8.95038e-06
	21.7548	3.94629e-06	8.9218e-06
	21.7636	3.94193e-06	8.89307e-06
	21.7724	3.93716e-06	8.8631e-06
	21.7811	3.93285e-06	8.83263e-06
	21.7899	3.92857e-06	8.80223e-06
	21.7987	3.92445e-06	8.77144e-06
	21.8074	3.9204e-06	8.7398e-06
	21.8162	3.91636e-06	8.7081e-06
	21.825	3.91228e-06	8.67614e-06
	21.8338	3.90826e-06	8.64376e-06
	21.8425	3.9045e-06	8.61096e-06
	21.8513	3.90107e-06	8.57744e-06
	21.8601	3.89757e-06	8.54357e-06
	21.8688	3.89418e-06	8.50952e-06
	21.8776	3.89122e-06	8.47494e-06
	21.8864	3.88833e-06	8.43978e-06
	21.8952	3.88551e-06	8.40419e-06
	21.9039	3.88282e-06	8.36804e-06
	21.9127	3.8812e-06	8.33188e-06
	21.9215	3.88003e-06	8.29476e-06
	21.9303	3.87815e-06	8.25673e-06
	21.939	3.87676e-06	8.21887e-06
	21.9478	3.87649e-06	8.18117e-06
	21.9566	3.87679e-06	8.14247e-06
	21.9653	3.87744e-06	8.10331e-06
	21.9741	3.87824e-06	8.06371e-06
	21.9829	3.8799e-06	8.02356e-06
	21.9917	3.88264e-06	7.98348e-06
	22.0004	3.88527e-06	7.94277e-06
	22.0092	3.88808e-06	7.90096e-06
	22.018	3.89189e-06	7.85911e-06
	22.0267	3.89644e-06	7.8174e-06
	22.0355	3.90215e-06	7.77533e-06
	22.0443	3.90827e-06	7.73249e-06
	22.0531	3.91493e-06	7.68898e-06
	22.0618	3.92284e-06	7.64516e-06
	22.0706	3.93127e-06	7.6013e-06
	22.0794	3.94097e-06	7.55749e-06
	22.0881	3.95193e-06	7.51318e-06
	22.0969	3.96338e-06	7.46842e-06
	22.1057	3.97588e-06	7.42305e-06
	22.1145	3.98931e-06	7.37753e-06
	22.1232	4.00336e-06	7.33224e-06
	22.132	4.01899e-06	7.28652e-06
	22.1408	4.03634e-06	7.24003e-06
	22.1496	4.05454e-06	7.19348e-06
	22.1583	4.07389e-06	7.14663e-06
	22.1671	4.09417e-06	7.09973e-06
	22.1759	4.11594e-06	7.05276e-06
	22.1846	4.13923e-06	7.00539e-06
	22.1934	4.16321e-06	6.95803e-06
	22.2022	4.18913e-06	6.91015e-06
	22.211	4.21635e-06	6.86192e-06
	22.2197	4.24479e-06	6.81337e-06
	22.2285	4.2754e-06	6.765e-06
	22.2373	4.30786e-06	6.71682e-06
	22.246	4.34141e-06	6.66863e-06
	22.2548	4.3762e-06	6.62001e-06
	22.2636	4.41328e-06	6.57165e-06
	22.2724	4.45225e-06	6.52341e-06
	22.2811	4.4927e-06	6.47495e-06
	22.2899	4.53464e-06	6.42623e-06
	22.2987	4.57856e-06	6.37714e-06
	22.3074	4.62437e-06	6.32882e-06
	22.3162	4.67177e-06	6.28083e-06
	22.325	4.72181e-06	6.23265e-06
	22.3338	4.77415e-06	6.18425e-06
	22.3425	4.82818e-06	6.13566e-06
	22.3513	4.88388e-06	6.08733e-06
	22.3601	4.94175e-06	6.03951e-06
	22.3689	5.00233e-06	5.99156e-06
	22.3776	5.06517e-06	5.94337e-06
	22.3864	5.13004e-06	5.89561e-06
	22.3952	5.1969e-06	5.84848e-06
	22.4039	5.26654e-06	5.80148e-06
	22.4127	5.33245e-06	5.75492e-06
	22.4215	5.40447e-06	5.70849e-06
	22.4303	5.48539e-06	5.66166e-06
	22.439	5.56449e-06	5.61534e-06
	22.4478	5.64615e-06	5.5694e-06
	22.4566	5.7305e-06	5.52403e-06
	22.4653	5.81792e-06	5.47916e-06
	22.4741	5.90787e-06	5.4341e-06
	22.4829	6.00013e-06	5.3895e-06
	22.4917	6.09502e-06	5.34501e-06
	22.5004	6.19263e-06	5.30109e-06
	22.5092	6.29343e-06	5.25754e-06
	22.518	6.39773e-06	5.21383e-06
	22.5267	6.50452e-06	5.17053e-06
	22.5355	6.61326e-06	5.12815e-06
	22.5443	6.72556e-06	5.08593e-06
	22.5531	6.84117e-06	5.04392e-06
	22.5618	6.95964e-06	5.00265e-06
	22.5706	7.08144e-06	4.9616e-06
	22.5794	7.20582e-06	4.92052e-06
	22.5882	7.333e-06	4.88027e-06
	22.5969	7.46423e-06	4.84074e-06
	22.6057	7.5988e-06	4.80149e-06
	22.6145	7.73597e-06	4.76275e-06
	22.6232	7.87657e-06	4.724e-06
	22.632	8.02024e-06	4.68579e-06
	22.6408	8.1662e-06	4.64835e-06
	22.6496	8.31673e-06	4.61167e-06
	22.6583	8.47139e-06	4.57528e-06
	22.6671	8.62752e-06	4.53893e-06
	22.6759	8.78716e-06	4.50352e-06
	22.6846	8.95051e-06	4.46894e-06
	22.6934	9.11715e-06	4.43477e-06
	22.7022	9.28739e-06	4.40083e-06
	22.711	9.46104e-06	4.36756e-06
	22.7197	9.63795e-06	4.33467e-06
	22.7285	9.81706e-06	4.30175e-06
	22.7373	9.99996e-06	4.27005e-06
	22.746	1.01867e-05	4.23967e-06
	22.7548	1.03764e-05	4.20957e-06
	22.7636	1.05697e-05	4.17916e-06
	22.7724	1.07662e-05	4.14891e-06
	22.7811	1.09649e-05	4.11976e-06
	22.7899	1.11673e-05	4.09101e-06
	22.7987	1.13734e-05	4.06246e-06
	22.8075	1.15818e-05	4.03524e-06
	22.8162	1.17935e-05	4.00839e-06
	22.825	1.2008e-05	3.98183e-06
	22.8338	1.22245e-05	3.95633e-06
	22.8425	1.24455e-05	3.93141e-06
	22.8513	1.26695e-05	3.9064e-06
	22.8601	1.28947e-05	3.88217e-06
	22.8689	1.31236e-05	3.85856e-06
	22.8776	1.33553e-05	3.8354e-06
	22.8864	1.3589e-05	3.81303e-06
	22.8952	1.38256e-05	3.7907e-06
	22.9039	1.40643e-05	3.76859e-06
	22.9127	1.43051e-05	3.74775e-06
	22.9215	1.45488e-05	3.72802e-06
	22.9303	1.47938e-05	3.70828e-06
	22.939	1.50413e-05	3.68897e-06
	22.9478	1.52903e-05	3.66999e-06
	22.9566	1.55411e-05	3.65145e-06
	22.9653	1.57939e-05	3.63364e-06
	22.9741	1.60475e-05	3.61644e-06
	22.9829	1.63032e-05	3.59943e-06
	22.9917	1.65604e-05	3.58318e-06
	23.0004	1.68179e-05	3.5672e-06
	23.0092	1.7077e-05	3.55141e-06
	23.018	1.73373e-05	3.53628e-06
	23.0268	1.75974e-05	3.52145e-06
	23.0355	1.7859e-05	3.50767e-06
	23.0443	1.81213e-05	3.49359e-06
	23.0531	1.83832e-05	3.47974e-06
	23.0618	1.86457e-05	3.46681e-06
	23.0706	1.89079e-05	3.45422e-06
	23.0794	1.91694e-05	3.44233e-06
	23.0882	1.94313e-05	3.43076e-06
	23.0969	1.96926e-05	3.41937e-06
	23.1057	1.99521e-05	3.40886e-06
	23.1145	2.02115e-05	3.39852e-06
	23.1232	2.04702e-05	3.3884e-06
	23.132	2.07274e-05	3.37903e-06
	23.1408	2.09833e-05	3.36967e-06
	23.1496	2.12374e-05	3.3609e-06
	23.1583	2.14892e-05	3.35239e-06
	23.1671	2.1739e-05	3.3442e-06
	23.1759	2.19874e-05	3.33617e-06
	23.1846	2.22328e-05	3.328e-06
	23.1934	2.24752e-05	3.32065e-06
	23.2022	2.27154e-05	3.31402e-06
	23.211	2.29531e-05	3.30707e-06
	23.2197	2.31872e-05	3.30032e-06
	23.2285	2.3418e-05	3.29417e-06
	23.2373	2.36453e-05	3.28741e-06
	23.2461	2.38688e-05	3.28112e-06
	23.2548	2.40893e-05	3.27608e-06
	23.2636	2.43057e-05	3.27089e-06
	23.2724	2.45178e-05	3.26551e-06
	23.2811	2.47252e-05	3.26036e-06
	23.2899	2.4928e-05	3.25557e-06
	23.2987	2.51264e-05	3.25109e-06
	23.3075	2.532e-05	3.24657e-06
	23.3162	2.5509e-05	3.24203e-06
	23.325	2.56922e-05	3.23787e-06
	23.3338	2.58694e-05	3.23386e-06
	23.3425	2.60415e-05	3.22938e-06
	23.3513	2.62086e-05	3.22555e-06
	23.3601	2.63705e-05	3.22171e-06
	23.3689	2.65261e-05	3.21772e-06
	23.3776	2.6675e-05	3.21381e-06
	23.3864	2.68178e-05	3.20973e-06
	23.3952	2.69548e-05	3.20696e-06
	23.4039	2.70856e-05	3.20372e-06
	23.4127	2.72094e-05	3.19936e-06
	23.4215	2.73264e-05	3.19617e-06
	23.4303	2.74364e-05	3.19314e-06
	23.439	2.75397e-05	3.18931e-06
	23.4478	2.76367e-05	3.18568e-06
	23.4566	2.77267e-05	3.18255e-06
	23.4654	2.78092e-05	3.17882e-06
	23.4741	2.78849e-05	3.17476e-06
	23.4829	2.79531e-05	3.17103e-06
	23.4917	2.80143e-05	3.16729e-06
	23.5004	2.80684e-05	3.16355e-06
	23.5092	2.81149e-05	3.15933e-06
	23.518	2.81538e-05	3.15495e-06
	23.5268	2.81852e-05	3.15125e-06
	23.5355	2.82095e-05	3.14714e-06
	23.5443	2.82267e-05	3.1427e-06
	23.5531	2.82311e-05	3.13809e-06
	23.5618	2.82328e-05	3.13374e-06
	23.5706	2.82272e-05	3.12916e-06
	23.5794	2.82216e-05	3.1239e-06
	23.5882	2.82023e-05	3.11919e-06
	23.5969	2.81757e-05	3.1139e-06
	23.6057	2.81413e-05	3.10861e-06
	23.6145	2.81001e-05	3.10306e-06
	23.6232	2.80514e-05	3.09752e-06
	23.632	2.79957e-05	3.0921e-06
	23.6408	2.79332e-05	3.0859e-06
	23.6496	2.78639e-05	3.07903e-06
	23.6583	2.7787e-05	3.07195e-06
	23.6671	2.77029e-05	3.06486e-06
	23.6759	2.76126e-05	3.05782e-06
	23.6847	2.7516e-05	3.0509e-06
	23.6934	2.74127e-05	3.04368e-06
	23.7022	2.73028e-05	3.03608e-06
	23.711	2.71863e-05	3.02834e-06
	23.7197	2.70635e-05	3.0201e-06
	23.7285	2.69348e-05	3.01195e-06
	23.7373	2.68006e-05	3.00392e-06
	23.7461	2.66602e-05	2.99461e-06
	23.7548	2.6514e-05	2.98546e-06
	23.7636	2.63624e-05	2.97651e-06
	23.7724	2.62048e-05	2.96723e-06
	23.7811	2.60422e-05	2.9575e-06
	23.7899	2.58748e-05	2.94768e-06
	23.7987	2.57016e-05	2.93778e-06
	23.8075	2.55234e-05	2.92706e-06
	23.8162	2.53406e-05	2.91702e-06
	23.825	2.51535e-05	2.90699e-06
	23.8338	2.4962e-05	2.89566e-06
	23.8425	2.4766e-05	2.8838e-06
	23.8513	2.4566e-05	2.87199e-06
	23.8601	2.43622e-05	2.86022e-06
	23.8689	2.41541e-05	2.84861e-06
	23.8776	2.39423e-05	2.83673e-06
	23.8864	2.37272e-05	2.82398e-06
	23.8952	2.35085e-05	2.81132e-06
	23.904	2.32872e-05	2.79891e-06
	23.9127	2.30625e-05	2.78571e-06
	23.9215	2.28348e-05	2.77289e-06
	23.9303	2.26049e-05	2.75971e-06
	23.939	2.23717e-05	2.74567e-06
	23.9478	2.21362e-05	2.73176e-06
	23.9566	2.18993e-05	2.71799e-06
	23.9654	2.16594e-05	2.70449e-06
	23.9741	2.14177e-05	2.69036e-06
	23.9829	2.11752e-05	2.67582e-06
	23.9917	2.09306e-05	2.66129e-06
	24.0004	2.06848e-05	2.64691e-06
	24.0092	2.04382e-05	2.63183e-06
	24.018	2.01898e-05	2.61658e-06
	24.0268	1.99404e-05	2.60173e-06
	24.0355	1.96902e-05	2.58655e-06
	24.0443	1.94401e-05	2.57112e-06
	24.0531	1.91891e-05	2.55568e-06
	24.0618	1.89377e-05	2.54009e-06
	24.0706	1.86869e-05	2.52432e-06
	24.0794	1.8435e-05	2.50823e-06
	24.0882	1.81834e-05	2.49224e-06
	24.0969	1.79331e-05	2.47662e-06
	24.1057	1.76821e-05	2.46087e-06
	24.1145	1.74315e-05	2.44461e-06
	24.1233	1.7182e-05	2.42817e-06
	24.132	1.69323e-05	2.41184e-06
	24.1408	1.66841e-05	2.39561e-06
	24.1496	1.6437e-05	2.37949e-06
	24.1583	1.61901e-05	2.3631e-06
	24.1671	1.59445e-05	2.34669e-06
	24.1759	1.57006e-05	2.33046e-06
	24.1847	1.54577e-05	2.31398e-06
	24.1934	1.52161e-05	2.29721e-06
	24.2022	1.49763e-05	2.28021e-06
	24.211	1.47376e-05	2.26354e-06
	24.2197	1.45003e-05	2.24682e-06
	24.2285	1.42656e-05	2.2303e-06
	24.2373	1.40326e-05	2.21436e-06
	24.2461	1.38009e-05	2.19766e-06
	24.2548	1.3571e-05	2.18118e-06
	24.2636	1.33434e-05	2.16494e-06
	24.2724	1.31177e-05	2.14814e-06
	24.2811	1.28949e-05	2.13186e-06
	24.2899	1.26747e-05	2.11598e-06
	24.2987	1.2456e-05	2.0997e-06
	24.3075	1.22401e-05	2.08358e-06
	24.3162	1.20267e-05	2.06741e-06
	24.325	1.18149e-05	2.05105e-06
	24.3338	1.16058e-05	2.03517e-06
	24.3426	1.13998e-05	2.0195e-06
	24.3513	1.11956e-05	2.00374e-06
	24.3601	1.09937e-05	1.98791e-06
	24.3689	1.07955e-05	1.97233e-06
	24.3776	1.05996e-05	1.95725e-06
	24.3864	1.04062e-05	1.94187e-06
	24.3952	1.02159e-05	1.92674e-06
	24.404	1.00281e-05	1.91139e-06
	24.4127	9.84303e-06	1.89568e-06
	24.4215	9.66049e-06	1.88095e-06
	24.4303	9.48053e-06	1.86647e-06
	24.439	9.30362e-06	1.85117e-06
	24.4478	9.1298e-06	1.83655e-06
	24.4566	8.95789e-06	1.82196e-06
	24.4654	8.78943e-06	1.8067e-06
	24.4741	8.62377e-06	1.79247e-06
	24.4829	8.4608e-06	1.77828e-06
	24.4917	8.30066e-06	1.76406e-06
	24.5004	8.14323e-06	1.74978e-06
	24.5092	7.98883e-06	1.73545e-06
	24.518	7.8368e-06	1.72165e-06
	24.5268	7.68761e-06	1.7081e-06
	24.5355	7.54149e-06	1.69489e-06
	24.5443	7.3976e-06	1.68167e-06
	24.5531	7.25641e-06	1.66861e-06
	24.5619	7.11861e-06	1.65603e-06
	24.5706	6.98297e-06	1.6436e-06
	24.5794	6.85006e-06	1.63083e-06
	24.5882	6.72055e-06	1.61826e-06
	24.5969	6.5924e-06	1.60639e-06
	24.6057	6.4674e-06	1.59441e-06
	24.6145	6.34607e-06	1.58241e-06
	24.6233	6.22597e-06	1.57098e-06
	24.632	6.10893e-06	1.55954e-06
	24.6408	5.9946e-06	1.54786e-06
	24.6496	5.88203e-06	1.53668e-06
	24.6583	5.77235e-06	1.52631e-06
	24.6671	5.66575e-06	1.51626e-06
	24.6759	5.56105e-06	1.50609e-06
	24.6847	5.45823e-06	1.4957e-06
	24.6934	5.36005e-06	1.48535e-06
	24.7022	5.26489e-06	1.47556e-06
	24.711	5.16968e-06	1.46655e-06
	24.7197	5.07606e-06	1.45744e-06
	24.7285	4.98547e-06	1.44811e-06
	24.7373	4.89703e-06	1.4392e-06
	24.7461	4.81065e-06	1.43078e-06
	24.7548	4.72656e-06	1.42253e-06
	24.7636	4.64414e-06	1.41431e-06
	24.7724	4.56417e-06	1.40649e-06
	24.7812	4.4868e-06	1.39908e-06
	24.7899	4.41108e-06	1.39224e-06
	24.7987	4.33728e-06	1.3853e-06
	24.8075	4.26589e-06	1.37912e-06
	24.8162	4.19659e-06	1.37368e-06
	24.825	4.1297e-06	1.36795e-06
	24.8338	4.06457e-06	1.36209e-06
	24.8426	4.00082e-06	1.35674e-06
	24.8513	3.9395e-06	1.35222e-06
	24.8601	3.88029e-06	1.34835e-06
	24.8689	3.82267e-06	1.34468e-06
	24.8776	3.7669e-06	1.34094e-06
	24.8864	3.71278e-06	1.33745e-06
	24.8952	3.66072e-06	1.33487e-06
	24.904	3.6106e-06	1.33294e-06
	24.9127	3.56229e-06	1.33056e-06
	24.9215	3.51581e-06	1.32857e-06
	24.9303	3.4712e-06	1.32731e-06
	24.939	3.42829e-06	1.32667e-06
	24.9478	3.38695e-06	1.32611e-06
	24.9566	3.34774e-06	1.32602e-06
	24.9654	3.30955e-06	1.3266e-06
	24.9741	3.27284e-06	1.32744e-06
	24.9829	3.23799e-06	1.32901e-06
	24.9917	3.20523e-06	1.33116e-06
	25.0005	3.17442e-06	1.33323e-06
	25.0092	3.14443e-06	1.33592e-06
	25.018	3.1158e-06	1.33882e-06
	25.0268	3.08863e-06	1.34179e-06
	25.0355	3.06301e-06	1.3458e-06
	25.0443	3.03897e-06	1.35002e-06
	25.0531	3.01601e-06	1.35488e-06
	25.0619	2.99454e-06	1.36012e-06
	25.0706	2.9747e-06	1.36552e-06
	25.0794	2.95619e-06	1.37171e-06
	25.0882	2.93856e-06	1.37814e-06
	25.0969	2.92258e-06	1.38482e-06
	25.1057	2.90853e-06	1.39217e-06
	25.1145	2.89484e-06	1.40006e-06
	25.1233	2.88207e-06	1.40777e-06
	25.132	2.87104e-06	1.41623e-06
	25.1408	2.86135e-06	1.42553e-06
	25.1496	2.85271e-06	1.43454e-06
	25.1583	2.84456e-06	1.44354e-06
	25.1671	2.83778e-06	1.45323e-06
	25.1759	2.83254e-06	1.46351e-06
	25.1847	2.82773e-06	1.47389e-06
	25.1934	2.82412e-06	1.48442e-06
	25.2022	2.82085e-06	1.49526e-06
	25.211	2.81839e-06	1.50662e-06
	25.2198	2.81761e-06	1.51789e-06
	25.2285	2.81683e-06	1.52937e-06
	25.2373	2.81696e-06	1.54163e-06
	25.2461	2.81814e-06	1.55367e-06
	25.2548	2.81966e-06	1.56557e-06
	25.2636	2.8219e-06	1.57751e-06
	25.2724	2.82461e-06	1.58992e-06
	25.2812	2.82768e-06	1.60274e-06
	25.2899	2.83115e-06	1.61511e-06
	25.2987	2.83563e-06	1.62774e-06
	25.3075	2.84045e-06	1.64057e-06
	25.3162	2.84521e-06	1.65359e-06
	25.325	2.85038e-06	1.66691e-06
	25.3338	2.856e-06	1.67999e-06
	25.3426	2.86188e-06	1.69266e-06
	25.3513	2.86771e-06	1.70497e-06
	25.3601	2.87415e-06	1.71752e-06
	25.3689	2.88064e-06	1.7303e-06
	25.3776	2.88723e-06	1.74258e-06
	25.3864	2.89436e-06	1.75458e-06
	25.3952	2.90066e-06	1.76652e-06
	25.404	2.9067e-06	1.77778e-06
	25.4127	2.91306e-06	1.78905e-06
	25.4215	2.91928e-06	1.80046e-06
	25.4303	2.92505e-06	1.81148e-06
	25.4391	2.93102e-06	1.82212e-06
	25.4478	2.93706e-06	1.83246e-06
	25.4566	2.9424e-06	1.84293e-06
	25.4654	2.94772e-06	1.85292e-06
	25.4741	2.95329e-06	1.862e-06
	25.4829	2.95792e-06	1.87005e-06
	25.4917	2.96154e-06	1.8784e-06
	25.5005	2.96537e-06	1.88687e-06
	25.5092	2.96888e-06	1.89455e-06
	25.518	2.97193e-06	1.90156e-06
	25.5268	2.9744e-06	1.90786e-06
	25.5355	2.97629e-06	1.91408e-06
	25.5443	2.97773e-06	1.91996e-06
	25.5531	2.9788e-06	1.9255e-06
	25.5619	2.97867e-06	1.93006e-06
	25.5706	2.9784e-06	1.93394e-06
	25.5794	2.97814e-06	1.93786e-06
	25.5882	2.9772e-06	1.94067e-06
	25.5969	2.97548e-06	1.94297e-06
	25.6057	2.97268e-06	1.9454e-06
	25.6145	2.96942e-06	1.94741e-06
	25.6233	2.96562e-06	1.94781e-06
	25.632	2.96106e-06	1.94773e-06
	25.6408	2.95545e-06	1.9476e-06
	25.6496	2.94926e-06	1.94746e-06
	25.6584	2.94251e-06	1.94612e-06
	25.6671	2.93556e-06	1.94439e-06
	25.6759	2.92796e-06	1.94216e-06
	25.6847	2.91917e-06	1.93904e-06
	25.6934	2.90996e-06	1.93552e-06
	25.7022	2.90016e-06	1.93135e-06
	25.711	2.88949e-06	1.92692e-06
	25.7198	2.87804e-06	1.92179e-06
	25.7285	2.86606e-06	1.91605e-06
	25.7373	2.85343e-06	1.90991e-06
	25.7461	2.83999e-06	1.90342e-06
	25.7548	2.82641e-06	1.89643e-06
	25.7636	2.81224e-06	1.8888e-06
	25.7724	2.79708e-06	1.8805e-06
	25.7812	2.78147e-06	1.87191e-06
	25.7899	2.76507e-06	1.86335e-06
	25.7987	2.74853e-06	1.8539e-06
	25.8075	2.73172e-06	1.84343e-06
	25.8162	2.7139e-06	1.83309e-06
	25.825	2.69531e-06	1.82236e-06
	25.8338	2.67638e-06	1.81063e-06
	25.8426	2.65698e-06	1.79967e-06
	25.8513	2.63697e-06	1.78795e-06
	25.8601	2.61338e-06	1.77527e-06
	25.8689	2.58443e-06	1.76244e-06
	25.8777	2.55833e-06	1.74936e-06
	25.8864	2.53725e-06	1.73625e-06
	25.8952	2.51565e-06	1.72312e-06
	25.904	2.49303e-06	1.70887e-06
	25.9127	2.46878e-06	1.6943e-06
	25.9215	2.43714e-06	1.68056e-06
	25.9303	2.3958e-06	1.66632e-06
	25.9391	2.35865e-06	1.65174e-06
	25.9478	2.33231e-06	1.63686e-06
	25.9566	2.30807e-06	1.62185e-06
	25.9654	2.28351e-06	1.60681e-06
	25.9741	2.26001e-06	1.59141e-06
	25.9829	2.23647e-06	1.57576e-06
	25.9917	2.21182e-06	1.56009e-06
	26.0005	2.18742e-06	1.54428e-06
	26.0092	2.1632e-06	1.52818e-06
	26.018	2.13852e-06	1.51226e-06
	26.0268	2.11379e-06	1.49661e-06
	26.0355	2.08932e-06	1.47981e-06
	26.0443	2.06478e-06	1.46294e-06
	26.0531	2.0401e-06	1.44677e-06
	26.0619	2.01519e-06	1.43028e-06
	26.0706	1.99085e-06	1.41439e-06
	26.0794	1.9672e-06	1.39855e-06
	26.0882	1.94265e-06	1.38183e-06
	26.097	1.91817e-06	1.36503e-06
	26.1057	1.89441e-06	1.34908e-06
	26.1145	1.87057e-06	1.33383e-06
	26.1233	1.8463e-06	1.3182e-06
	26.132	1.82246e-06	1.30185e-06
	26.1408	1.79927e-06	1.28606e-06
	26.1496	1.77605e-06	1.27021e-06
	26.1584	1.75276e-06	1.25437e-06
	26.1671	1.72999e-06	1.23879e-06
	26.1759	1.70768e-06	1.22367e-06
	26.1847	1.68509e-06	1.20869e-06
	26.1934	1.66292e-06	1.19321e-06
	26.2022	1.64117e-06	1.17868e-06
	26.211	1.61943e-06	1.16379e-06
	26.2198	1.5983e-06	1.14911e-06
	26.2285	1.5775e-06	1.13491e-06
	26.2373	1.55672e-06	1.1206e-06
	26.2461	1.53513e-06	1.10644e-06
	26.2548	1.51204e-06	1.09247e-06
	26.2636	1.48048e-06	1.07912e-06
	26.2724	1.44371e-06	1.0662e-06
	26.2812	1.41122e-06	1.05325e-06
	26.2899	1.38614e-06	1.03998e-06
	26.2987	1.36727e-06	1.02719e-06
	26.3075	1.34928e-06	1.01431e-06
	26.3163	1.33167e-06	1.00196e-06
	26.325	1.31405e-06	9.89581e-07
	26.3338	1.297e-06	9.77588e-07
	26.3426	1.28015e-06	9.66345e-07
	26.3513	1.26378e-06	9.54881e-07
	26.3601	1.24811e-06	9.43985e-07
	26.3689	1.23252e-06	9.33215e-07
	26.3777	1.21731e-06	9.22397e-07
	26.3864	1.20223e-06	9.11834e-07
	26.3952	1.18744e-06	9.02023e-07
	26.404	1.17356e-06	8.91869e-07
	26.4127	1.16007e-06	8.81747e-07
	26.4215	1.14666e-06	8.72222e-07
	26.4303	1.13328e-06	8.62711e-07
	26.4391	1.11997e-06	8.53742e-07
	26.4478	1.10797e-06	8.44774e-07
	26.4566	1.09632e-06	8.36008e-07
	26.4654	1.08451e-06	8.27657e-07
	26.4741	1.07324e-06	8.19695e-07
	26.4829	1.06201e-06	8.11916e-07
	26.4917	1.05115e-06	8.04232e-07
	26.5005	1.04093e-06	7.96646e-07
	26.5092	1.03086e-06	7.8913e-07
	26.518	1.0205e-06	7.82183e-07
	26.5268	1.01131e-06	7.75639e-07
	26.5356	1.00266e-06	7.6933e-07
	26.5443	9.93726e-07	7.63213e-07
	26.5531	9.85397e-07	7.57259e-07
	26.5619	9.7702e-07	7.511e-07
	26.5706	9.68371e-07	7.44983e-07
	26.5794	9.60849e-07	7.3908e-07
	26.5882	9.53721e-07	7.33804e-07
	26.597	9.46795e-07	7.29256e-07
	26.6057	9.39985e-07	7.2452e-07
	26.6145	9.32943e-07	7.19971e-07
	26.6233	9.26462e-07	7.15495e-07
	26.632	9.20143e-07	7.10523e-07
	26.6408	9.14459e-07	7.0629e-07
	26.6496	9.09236e-07	7.02571e-07
	26.6584	9.03561e-07	6.9882e-07
	26.6671	8.98537e-07	6.95175e-07
	26.6759	8.93826e-07	6.9149e-07
	26.6847	8.88913e-07	6.88382e-07
	26.6934	8.84683e-07	6.85672e-07
	26.7022	8.80644e-07	6.82377e-07
	26.711	8.76626e-07	6.79411e-07
	26.7198	8.73022e-07	6.77287e-07
	26.7285	8.69636e-07	6.74967e-07
	26.7373	8.66516e-07	6.72873e-07
	26.7461	8.63788e-07	6.71093e-07
	26.7549	8.60845e-07	6.69277e-07
	26.7636	8.58149e-07	6.67057e-07
	26.7724	8.55669e-07	6.65511e-07
	26.7812	8.5353e-07	6.64498e-07
	26.7899	8.51611e-07	6.62608e-07
	26.7987	8.49115e-07	6.61028e-07
	26.8075	8.46701e-07	6.6013e-07
	26.8163	8.44653e-07	6.59016e-07
	26.825	8.42762e-07	6.57667e-07
	26.8338	8.40938e-07	6.56843e-07
	26.8426	8.39158e-07	6.56034e-07
	26.8513	8.37305e-07	6.54897e-07
	26.8601	8.35726e-07	6.54276e-07
	26.8689	8.34374e-07	6.54131e-07
	26.8777	8.3265e-07	6.53874e-07
	26.8864	8.31292e-07	6.53626e-07
	26.8952	8.29943e-07	6.53492e-07
	26.904	8.28408e-07	6.53358e-07
	26.9127	8.2717e-07	6.53421e-07
	26.9215	8.26381e-07	6.53565e-07
	26.9303	8.25648e-07	6.53517e-07
	26.9391	8.24392e-07	6.53283e-07
	26.9478	8.2329e-07	6.53049e-07
	26.9566	8.22442e-07	6.52838e-07
	26.9654	8.21847e-07	6.53487e-07
	26.9742	8.21446e-07	6.54055e-07
	26.9829	8.2046e-07	6.53987e-07
	26.9917	8.19031e-07	6.53918e-07
	27.0005	8.18186e-07	6.54117e-07
	27.0092	8.17841e-07	6.54425e-07
	27.018	8.17182e-07	6.54659e-07
	27.0268	8.1652e-07	6.54957e-07
	27.0356	8.15807e-07	6.54945e-07
	27.0443	8.15087e-07	6.54878e-07
	27.0531	8.14031e-07	6.549e-07
	27.0619	8.13102e-07	6.55048e-07
	27.0706	8.12691e-07	6.55129e-07
	27.0794	8.11602e-07	6.55246e-07
	27.0882	8.10483e-07	6.55491e-07
	27.097	8.09869e-07	6.55528e-07
	27.1057	8.09285e-07	6.55518e-07
	27.1145	8.08494e-07	6.55403e-07
	27.1233	8.07652e-07	6.55228e-07
	27.132	8.06674e-07	6.55054e-07
	27.1408	8.05354e-07	6.55111e-07
	27.1496	8.04628e-07	6.55048e-07
	27.1584	8.04033e-07	6.54941e-07
	27.1671	8.02998e-07	6.54755e-07
	27.1759	8.01562e-07	6.54568e-07
	27.1847	8.00368e-07	6.53593e-07
	27.1935	7.99327e-07	6.53193e-07
	27.2022	7.98027e-07	6.52882e-07
	27.211	7.96962e-07	6.52571e-07
	27.2198	7.95485e-07	6.51854e-07
	27.2285	7.93866e-07	6.51326e-07
	27.2373	7.92281e-07	6.50613e-07
	27.2461	7.9126e-07	6.5003e-07
	27.2549	7.90019e-07	6.49042e-07
	27.2636	7.88493e-07	6.47795e-07
	27.2724	7.86976e-07	6.47184e-07
	27.2812	7.85019e-07	6.46751e-07
	27.2899	7.83401e-07	6.45693e-07
	27.2987	7.81888e-07	6.44527e-07
	27.3075	7.80141e-07	6.43712e-07
	27.3163	7.78913e-07	6.42595e-07
	27.325	7.77364e-07	6.41047e-07
	27.3338	7.75174e-07	6.39732e-07
	27.3426	7.73802e-07	6.38993e-07
	27.3513	7.72288e-07	6.37633e-07
	27.3601	7.70466e-07	6.35748e-07
	27.3689	7.68657e-07	6.34125e-07
	27.3777	7.66543e-07	6.32687e-07
	27.3864	7.64482e-07	6.31143e-07
	27.3952	7.62499e-07	6.29917e-07
	27.404	7.6061e-07	6.28704e-07
	27.4128	7.58485e-07	6.268e-07
	27.4215	7.56535e-07	6.25157e-07
	27.4303	7.55013e-07	6.23404e-07
	27.4391	7.5316e-07	6.2148e-07
	27.4478	7.51216e-07	6.19866e-07
	27.4566	7.49043e-07	6.18156e-07
	27.4654	7.46532e-07	6.16502e-07
	27.4742	7.44453e-07	6.14687e-07
	27.4829	7.4243e-07	6.12952e-07
	27.4917	7.4057e-07	6.11092e-07
	27.5005	7.38682e-07	6.08992e-07
	27.5092	7.36699e-07	6.06934e-07
	27.518	7.34759e-07	6.05174e-07
	27.5268	7.32951e-07	6.03494e-07
	27.5356	7.31342e-07	6.01835e-07
	27.5443	7.29397e-07	5.99716e-07
	27.5531	7.27419e-07	5.97402e-07
	27.5619	7.2517e-07	5.95423e-07
	27.5706	7.23226e-07	5.93483e-07
	27.5794	7.21277e-07	5.91307e-07
	27.5882	7.19147e-07	5.89246e-07
	27.597	7.17108e-07	5.87579e-07
	27.6057	7.15372e-07	5.85556e-07
	27.6145	7.1395e-07	5.83505e-07
	27.6233	7.12336e-07	5.8173e-07
	27.6321	7.10821e-07	5.79912e-07
	27.6408	7.09268e-07	5.7831e-07
	27.6496	7.07903e-07	5.76462e-07
	27.6584	7.06576e-07	5.7439e-07
	27.6671	7.04848e-07	5.72464e-07
	27.6759	7.03232e-07	5.70522e-07
	27.6847	7.02054e-07	5.68954e-07
	27.6935	7.0126e-07	5.67507e-07
	27.7022	7.0046e-07	5.65698e-07
	27.711	6.98841e-07	5.63826e-07
	27.7198	6.97208e-07	5.62683e-07
	27.7285	6.96209e-07	5.61459e-07
	27.7373	6.94838e-07	5.59578e-07
	27.7461	6.93745e-07	5.57674e-07
	27.7549	6.92518e-07	5.56012e-07
	27.7636	6.91501e-07	5.54865e-07
	27.7724	6.91327e-07	5.5364e-07
	27.7812	6.90817e-07	5.51798e-07
	27.7899	6.8969e-07	5.4999e-07
	27.7987	6.89253e-07	5.4895e-07
	27.8075	6.89039e-07	5.4768e-07
	27.8163	6.88515e-07	5.46452e-07
	27.825	6.88237e-07	5.45299e-07
	27.8338	6.88069e-07	5.44039e-07
	27.8426	6.87687e-07	5.43185e-07
	27.8514	6.87598e-07	5.41952e-07
	27.8601	6.87862e-07	5.40714e-07
	27.8689	6.87861e-07	5.39749e-07
	27.8777	6.88262e-07	5.39278e-07
	27.8864	6.88231e-07	5.38677e-07
	27.8952	6.88439e-07	5.37312e-07
	27.904	6.89154e-07	5.36133e-07
	27.9128	6.89303e-07	5.35432e-07
	27.9215	6.8985e-07	5.34465e-07
	27.9303	6.90728e-07	5.33362e-07
	27.9391	6.91451e-07	5.32867e-07
	27.9478	6.9255e-07	5.32463e-07
	27.9566	6.93708e-07	5.31745e-07
	27.9654	6.94571e-07	5.30915e-07
	27.9742	6.95635e-07	5.30331e-07
	27.9829	6.96863e-07	5.29947e-07
	27.9917	6.98272e-07	5.29445e-07
	28.0005	7.00183e-07	5.29102e-07
	28.0092	7.02111e-07	5.28751e-07
	28.018	7.03885e-07	5.28184e-07
	28.0268	7.05981e-07	5.27929e-07
	28.0356	7.07966e-07	5.27748e-07
	28.0443	7.09639e-07	5.27784e-07
	28.0531	7.12699e-07	5.27813e-07
	28.0619	7.15472e-07	5.27842e-07
	28.0707	7.17613e-07	5.2775e-07
	28.0794	7.20391e-07	5.27995e-07
	28.0882	7.22828e-07	5.2825e-07
	28.097	7.25629e-07	5.28424e-07
	28.1057	7.29357e-07	5.28932e-07
	28.1145	7.32478e-07	5.29373e-07
	28.1233	7.35387e-07	5.29378e-07
	28.1321	7.38869e-07	5.29551e-07
	28.1408	7.4255e-07	5.30293e-07
	28.1496	7.46416e-07	5.3117e-07
	28.1584	7.50336e-07	5.31315e-07
	28.1671	7.54082e-07	5.319e-07
	28.1759	7.57726e-07	5.33246e-07
	28.1847	7.62479e-07	5.33902e-07
	28.1935	7.67287e-07	5.34395e-07
	28.2022	7.71741e-07	5.35069e-07
	28.211	7.75965e-07	5.36094e-07
	28.2198	7.8049e-07	5.37664e-07
	28.2285	7.86005e-07	5.38936e-07
	28.2373	7.91738e-07	5.40529e-07
	28.2461	7.96946e-07	5.42242e-07
	28.2549	8.02198e-07	5.43644e-07
	28.2636	8.08437e-07	5.45331e-07
	28.2724	8.14709e-07	5.46912e-07
	28.2812	8.20404e-07	5.48317e-07
	28.29	8.26672e-07	5.49826e-07
	28.2987	8.33435e-07	5.52043e-07
	28.3075	8.39563e-07	5.54235e-07
	28.3163	8.45876e-07	5.56246e-07
	28.325	8.52857e-07	5.58818e-07
	28.3338	8.60026e-07	5.61314e-07
	28.3426	8.6671e-07	5.63251e-07
	28.3514	8.73582e-07	5.65645e-07
	28.3601	8.81097e-07	5.68518e-07
	28.3689	8.89063e-07	5.71407e-07
	28.3777	8.97195e-07	5.74484e-07
	28.3864	9.04624e-07	5.77134e-07
	28.3952	9.12194e-07	5.79554e-07
	28.404	9.20066e-07	5.82719e-07
	28.4128	9.27722e-07	5.8642e-07
	28.4215	9.35781e-07	5.89863e-07
	28.4303	9.4435e-07	5.9278e-07
	28.4391	9.52593e-07	5.96106e-07
	28.4478	9.60661e-07	5.99718e-07
	28.4566	9.69246e-07	6.03374e-07
	28.4654	9.7796e-07	6.06949e-07
	28.4742	9.8621e-07	6.10359e-07
	28.4829	9.94597e-07	6.1449e-07
	28.4917	1.00306e-06	6.18398e-07
	28.5005	1.01169e-06	6.22219e-07
	28.5093	1.02071e-06	6.26569e-07
	28.518	1.02946e-06	6.30591e-07
	28.5268	1.03802e-06	6.34459e-07
	28.5356	1.04639e-06	6.38425e-07
	28.5443	1.05464e-06	6.42797e-07
	28.5531	1.06329e-06	6.47201e-07
	28.5619	1.07182e-06	6.51056e-07
	28.5707	1.07986e-06	6.55653e-07
	28.5794	1.08832e-06	6.59933e-07
	28.5882	1.09637e-06	6.64143e-07
	28.597	1.10433e-06	6.68723e-07
	28.6057	1.11264e-06	6.72646e-07
	28.6145	1.1207e-06	6.77202e-07
	28.6233	1.1283e-06	6.81515e-07
	28.6321	1.13565e-06	6.85776e-07
	28.6408	1.14304e-06	6.90294e-07
	28.6496	1.15053e-06	6.94079e-07
	28.6584	1.15764e-06	6.98125e-07
	28.6671	1.16459e-06	7.02163e-07
	28.6759	1.17124e-06	7.0596e-07
	28.6847	1.17711e-06	7.09951e-07
	28.6935	1.18318e-06	7.14016e-07
	28.7022	1.1892e-06	7.17629e-07
	28.711	1.195e-06	7.21537e-07
	28.7198	1.20029e-06	7.25505e-07
	28.7286	1.20552e-06	7.2843e-07
	28.7373	1.21091e-06	7.3169e-07
	28.7461	1.21559e-06	7.35429e-07
	28.7549	1.2196e-06	7.39213e-07
	28.7636	1.22381e-06	7.42019e-07
	28.7724	1.22788e-06	7.44763e-07
	28.7812	1.23113e-06	7.48148e-07
	28.79	1.23427e-06	7.50273e-07
	28.7987	1.23679e-06	7.52549e-07
	28.8075	1.23929e-06	7.55335e-07
	28.8163	1.24177e-06	7.57451e-07
	28.825	1.24336e-06	7.59593e-07
	28.8338	1.24485e-06	7.61253e-07
	28.8426	1.24614e-06	7.63159e-07
	28.8514	1.24711e-06	7.65118e-07
	28.8601	1.24779e-06	7.66378e-07
	28.8689	1.24754e-06	7.67689e-07
	28.8777	1.24728e-06	7.68469e-07
	28.8864	1.24682e-06	7.69496e-07
	28.8952	1.24619e-06	7.70547e-07
	28.904	1.24555e-06	7.711e-07
	28.9128	1.24409e-06	7.7111e-07
	28.9215	1.24264e-06	7.71028e-07
	28.9303	1.24009e-06	7.71006e-07
	28.9391	1.23765e-06	7.70922e-07
	28.9479	1.235e-06	7.70616e-07
	28.9566	1.23156e-06	7.70309e-07
	28.9654	1.22829e-06	7.69512e-07
	28.9742	1.22513e-06	7.68988e-07
	28.9829	1.22152e-06	7.68213e-07
	28.9917	1.21733e-06	7.67133e-07
	29.0005	1.21288e-06	7.65515e-07
	29.0093	1.20767e-06	7.63891e-07
	29.018	1.20242e-06	7.62088e-07
	29.0268	1.19779e-06	7.60181e-07
	29.0356	1.19242e-06	7.5831e-07
	29.0443	1.1868e-06	7.5595e-07
	29.0531	1.1809e-06	7.53724e-07
	29.0619	1.17447e-06	7.51552e-07
	29.0707	1.16799e-06	7.48744e-07
	29.0794	1.16132e-06	7.45959e-07
	29.0882	1.15455e-06	7.43227e-07
	29.097	1.14756e-06	7.40126e-07
	29.1057	1.14016e-06	7.36949e-07
	29.1145	1.13279e-06	7.33876e-07
	29.1233	1.12561e-06	7.30876e-07
	29.1321	1.11791e-06	7.27362e-07
	29.1408	1.10963e-06	7.2323e-07
	29.1496	1.1017e-06	7.19391e-07
	29.1584	1.09374e-06	7.15817e-07
	29.1672	1.0853e-06	7.12041e-07
	29.1759	1.07721e-06	7.08259e-07
	29.1847	1.06907e-06	7.03995e-07
	29.1935	1.06047e-06	6.99744e-07
	29.2022	1.05189e-06	6.95825e-07
	29.211	1.04297e-06	6.91522e-07
	29.2198	1.0347e-06	6.87466e-07
	29.2286	1.02637e-06	6.83372e-07
	29.2373	1.01734e-06	6.79191e-07
	29.2461	1.00843e-06	6.75352e-07
	29.2549	9.99487e-07	6.71233e-07
	29.2636	9.9083e-07	6.66746e-07
	29.2724	9.82227e-07	6.62192e-07
	29.2812	9.73239e-07	6.57523e-07
	29.29	9.6417e-07	6.52497e-07
	29.2987	9.55432e-07	6.47823e-07
	29.3075	9.46613e-07	6.43536e-07
	29.3163	9.37352e-07	6.39222e-07
	29.325	9.28323e-07	6.34962e-07
	29.3338	9.19493e-07	6.30201e-07
	29.3426	9.1014e-07	6.25473e-07
	29.3514	9.01214e-07	6.21068e-07
	29.3601	8.92576e-07	6.16581e-07
	29.3689	8.84092e-07	6.12224e-07
	29.3777	8.7548e-07	6.08059e-07
	29.3865	8.66861e-07	6.03335e-07
	29.3952	8.58665e-07	5.98734e-07
	29.404	8.50133e-07	5.94764e-07
	29.4128	8.41945e-07	5.90489e-07
	29.4215	8.33482e-07	5.86133e-07
	29.4303	8.25415e-07	5.8191e-07
	29.4391	8.1769e-07	5.77959e-07
	29.4479	8.10075e-07	5.74129e-07
	29.4566	8.0261e-07	5.70015e-07
	29.4654	7.94663e-07	5.65789e-07
	29.4742	7.86412e-07	5.61861e-07
	29.4829	7.78415e-07	5.57371e-07
	29.4917	7.71473e-07	5.53396e-07
	29.5005	7.64646e-07	5.50226e-07
	29.5093	7.57234e-07	5.46747e-07
	29.518	7.49792e-07	5.42592e-07
	29.5268	7.43026e-07	5.38225e-07
	29.5356	7.36071e-07	5.34746e-07
	29.5443	7.292e-07	5.31141e-07
	29.5531	7.22893e-07	5.2808e-07
	29.5619	7.16424e-07	5.24827e-07
	29.5707	7.09654e-07	5.21207e-07
	29.5794	7.03359e-07	5.17975e-07
	29.5882	6.97121e-07	5.15138e-07
	29.597	6.90826e-07	5.12215e-07
	29.6058	6.84647e-07	5.08666e-07
	29.6145	6.78705e-07	5.05186e-07
	29.6233	6.72762e-07	5.02059e-07
	29.6321	6.67362e-07	4.99116e-07
	29.6408	6.62521e-07	4.96209e-07
	29.6496	6.57175e-07	4.93842e-07
	29.6584	6.51777e-07	4.9093e-07
	29.6672	6.46629e-07	4.87539e-07
	29.6759	6.41468e-07	4.8457e-07
	29.6847	6.36398e-07	4.82437e-07
	29.6935	6.31792e-07	4.80096e-07
	29.7022	6.26989e-07	4.77192e-07
	29.711	6.22479e-07	4.74386e-07
	29.7198	6.1859e-07	4.71848e-07
	29.7286	6.14237e-07	4.69667e-07
	29.7373	6.09789e-07	4.67528e-07
	29.7461	6.05838e-07	4.65069e-07
	29.7549	6.01714e-07	4.62242e-07
	29.7636	5.97552e-07	4.59898e-07
	29.7724	5.93698e-07	4.58043e-07
	29.7812	5.89851e-07	4.56229e-07
	29.79	5.86507e-07	4.5389e-07
	29.7987	5.83103e-07	4.51842e-07
	29.8075	5.79447e-07	4.5023e-07
	29.8163	5.7614e-07	4.48333e-07
	29.8251	5.72996e-07	4.46373e-07
	29.8338	5.69673e-07	4.44601e-07
	29.8426	5.66388e-07	4.42379e-07
	29.8514	5.63632e-07	4.39865e-07
	29.8601	5.60495e-07	4.37816e-07
	29.8689	5.57262e-07	4.36259e-07
	29.8777	5.54745e-07	4.34777e-07
	29.8865	5.52467e-07	4.32828e-07
	29.8952	5.50057e-07	4.30921e-07
	29.904	5.47384e-07	4.29668e-07
	29.9128	5.4514e-07	4.28501e-07
	29.9215	5.43009e-07	4.27227e-07
	29.9303	5.40754e-07	4.26047e-07
	29.9391	5.38656e-07	4.24251e-07
	29.9479	5.36456e-07	4.22365e-07
	29.9566	5.34087e-07	4.21089e-07
	29.9654	5.32135e-07	4.20081e-07
	29.9742	5.30718e-07	4.19022e-07
	29.9829	5.29134e-07	4.17731e-07
	29.9917	5.27585e-07	4.1619e-07
	30.0005	5.26184e-07	4.14605e-07

## Sheet: Fig. 4
	Fig. 4a					Fig. 4d
	(CADH5/6 bending angle, ° vs time)					(Cluster Occupancy, %)
	time (ns)	WT	ΔCa2+	Canonical		State	WT	ΔCa2+	Canonical
	0	171.203	175.192	171.547		1	9	45	0
	1	170.76	176.676	165.066		2	52	23	8
	2	177.9	177.685	177.702		3	39	32	92
	3	173.35	176.307	167.977
	4	174.201	177.509	164.742
	5	177.795	174.159	168.083
	6	175.855	173.211	165.1
	7	170.889	170.174	171.063
	8	172.27	169.167	172.065
	9	172.444	166.827	167.948
	10	176.882	168.684	161.591
	11	175.539	164.857	164.075
	12	168.082	163.636	160.072
	13	167.209	169.898	159.934
	14	161.823	172.257	158.218
	15	163.027	167.337	156.577
	16	162.98	162.131	161.431
	17	162.223	162.251	160.72
	18	160.562	156.43	154.717
	19	167.885	155.561	156.348
	20	166.064	154.55	153.952
	21	158.409	155.377	150.759
	22	156.899	161.232	146.481
	23	155.941	160.546	149.904
	24	156.311	157.235	157.894
	25	155.666	155.524	159.616
	26	155.861	157.058	158.656
	27	159.992	162.946	155.689
	28	156.879	165.842	151.934
	29	148.544	160.603	148.671
	30	159.771	171.5	153.436
	31	154.893	170.264	164.496
	32	149.051	164.378	165.369
	33	155.401	159.606	164.541
	34	154.782	150.3	165.344
	35	153.878	162.206	166.662
	36	155.934	156.465	160.106
	37	156.254	156.951	164.698
	38	159.268	153.663	164.331
	39	153.42	150.875	163.293
	40	154.674	159.425	158.958
	41	154.313	159.494	159.568
	42	158.594	155.965	156.699
	43	157.406	155.984	157.954
	44	163.844	156.986	159.786
	45	171.309	157.296	164.55
	46	164.977	157.916	166.726
	47	163.039	157.003	161.63
	48	166.93	152.579	165.913
	49	163.411	157.69	169.692
	50	162.634	159.027	165.978
	51	162.793	159.941	163.115
	52	160.197	160.937	161.408
	53	162.526	165.758	163.901
	54	164.352	161.655	162.28
	55	166.983	155.909	169.646
	56	168.639	151.553	165.081
	57	169.296	152.701	162.809
	58	171.083	158.62	167.696
	59	167.808	159.816	175.739
	60	160.573	157.208	173.836
	61	162.955	159.828	170.934
	62	168.901	163.149	170.573
	63	172.765	164.918	160.773
	64	169.687	163.507	159.873
	65	170.924	163.656	157.314
	66	174.154	170.401	154.987
	67	174.059	171.948	152.361
	68	173.077	174.595	153.548
	69	170.293	176.529	156.924
	70	168.873	177.758	158.299
	71	166.226	174.636	150.488
	72	169.84	170.617	151.426
	73	170.333	166.547	151.195
	74	171.787	175.438	152.357
	75	171.043	175.892	153.505
	76	171.605	173.487	150.202
	77	174.457	170.949	150.905
	78	170.925	175.488	149.178
	79	172.192	169.071	148.094
	80	171.723	172.947	145.279
	81	178.638	170.24	141.335
	82	171.727	166.542	143.493
	83	168.493	157.187	146.964
	84	163.2	158.615	147.693
	85	161.946	158.468	154.516
	86	166.356	162.138	156.974
	87	159.515	164.5	155.155
	88	157.955	167.926	151.664
	89	158.635	167.075	151.189
	90	153.94	167.16	156.389
	91	152.78	172.23	159.853
	92	150.219	171.189	158.284
	93	150.294	167.191	168.658
	94	155.344	168.232	166.02
	95	153.72	170.165	158.278
	96	154.144	173.117	152.484
	97	159.478	175.404	152.985
	98	157.575	177.078	156.025
	99	159.89	177.486	154.108
	100	158.877	177.845	153.549
	101	158.47	171.681	153.81
	102	156.675	171.131	148.907
	103	162.452	170.784	144.835
	104	165.627	171.632	142.233
	105	165.183	176.411	143.488
	106	163.178	176.372	142.927
	107	169.072	174.2	144.774
	108	167.917	174.644	147.746
	109	164.713	177.311	144.528
	110	166.974	178.054	143.186
	111	169.127	177.514	148.459
	112	171.463	172.953	149.032
	113	166.269	177.594	154.557
	114	169.739	171.98	157.409
	115	173.798	170.447	162.305
	116	170.807	177.002	162.729
	117	173.978	171.26	162.672
	118	169.303	177.134	162.729
	119	165.608	172.104	161.388
	120	166.746	172.667	154.521
	121	169.927	171.281	160.537
	122	178.442	171.445	156.253
	123	175.291	162.335	153.364
	124	174.265	159.601	142.788
	125	176.838	160.359	147.554
	126	174.265	156.972	152.122
	127	175.872	155.284	154.168
	128	175.019	159.674	157.781
	129	168.275	161.748	162.95
	130	167.059	164.759	156.699
	131	171.897	169.311	150.602
	132	170.162	167.934	150.866
	133	167.414	162.05	143.353
	134	171.521	158.964	152.302
	135	174.686	163.337	152.589
	136	175.683	168.068	152.387
	137	171.191	164.577	149.212
	138	165.831	167.786	149.014
	139	169.198	166.975	148.764
	140	168.528	163.091	148.936
	141	170.385	163.934	151.631
	142	174.196	164.902	150.045
	143	175.039	162.261	154.458
	144	172.545	162.164	153.854
	145	167.839	160.458	156.818
	146	170.83	166.642	157.257
	147	174.986	170.753	160.515
	148	179.381	174.352	157.142
	149	173.281	172.362	160.39
	150	177.165	163.511	154.928
	151	174.75	168.255	159.625
	152	176.666	171.302	155.093
	153	173.01	169.067	156.761
	154	171.168	164.886	156.242
	155	172.105	170.353	163.472
	156	170.204	176.466	156.369
	157	169.946	163.196	157.936
	158	179.595	168.127	154.946
	159	175.715	165.864	151.884
	160	178.412	167.26	149.534
	161	173.087	168.788	153.457
	162	170.267	162.178	152.197
	163	172.63	166.297	153.938
	164	172.203	166.562	155.754
	165	170.333	165.859	159.367
	166	176.574	160.098	154.28
	167	177.405	158.597	151.604
	168	178.493	158.474	156.723
	169	175.846	155.634	163.146
	170	173.811	161.019	157.929
	171	169.866	159.227	164.625
	172	166.617	156.924	162.052
	173	171.459	161.477	158.507
	174	168.1	165.397	164.141
	175	168.082	162.508	161.389
	176	167.252	162.455	161.868
	177	167.532	156.238	168.722
	178	162.689	162.12	162.979
	179	167.728	162.16	160.35
	180	159.911	152.749	158.529
	181	163.903	149.848	154.311
	182	161.059	148.746	153.804
	183	160.054	144.728	149.824
	184	153.791	146.063	154.539
	185	158.209	149.799	153.579
	186	160.456	152.693	155.971
	187	158.151	158.272	160.191
	188	157.344	157.248	160.519
	189	152.448	155.169	151.143
	190	153.234	159.4	151.466
	191	157.536	159.077	155.644
	192	158.373	155.814	160.788
	193	156.859	155.935	159.108
	194	153.79	152.609	154.82
	195	154.807	151.861	151.813
	196	157.756	147.614	158.879
	197	166.978	143.118	150.173
	198	168.615	141.356	154.804
	199	171.843	144.628	149.513
	200	168.775	141.572	146.776
	201	164.634	148.189	149.356
	202	153.188	150.59	149.927
	203	149.724	144.088	153.664
	204	155.708	145.956	146.399
	205	156.039	144.139	151.732
	206	159.869	149.479	151.94
	207	159.656	148.329	152.978
	208	152.766	142.967	149.676
	209	153.602	147.229	150.105
	210	158.369	139.101	150.374
	211	166.216	145.44	157.117
	212	166.779	147.408	160.247
	213	163.647	146.707	159.116
	214	169.503	137.729	162.161
	215	165.055	138.485	164.111
	216	167.742	134.808	166.453
	217	169.992	136.405	162.478
	218	168.137	132.739	160.847
	219	168.621	138.105	158.406
	220	163.92	136.722	156.468
	221	157.693	133.482	159.53
	222	156.491	136.97	157.172
	223	162.452	134.057	155.802
	224	161.872	137.505	157.471
	225	164.722	138.894	157.962
	226	161.898	138.32	165.753
	227	159.64	141.496	167.843
	228	162.742	137.185	168.594
	229	162.674	137.239	160.725
	230	164.39	133.922	162.562
	231	160.429	134.662	153.051
	232	157.496	135.28	160.146
	233	158.788	134.013	157.173
	234	162.422	137.506	153.124
	235	165.362	137.047	144.29
	236	161.29	133.545	147.502
	237	164.338	135.227	151.018
	238	166.463	136.178	156.54
	239	166.791	131.214	155.445
	240	166.082	128.353	159.457
	241	161.376	129.332	158.869
	242	162.549	131.535	153.557
	243	157.355	141.643	159.401
	244	162.758	139.904	160.834
	245	159.838	133.453	160.248
	246	150.849	135.554	157.994
	247	149.506	139.246	150.667
	248	153.476	132.646	153.716
	249	156.479	134.814	153.092
	250	155.562	130.554	155.633
	251	152.58	129.663	159.331
	252	159.739	126.609	157.291
	253	165.991	126.409	156.884
	254	159.657	125.256	160.173
	255	158.214	124.05	154.409
	256	155.112	125.379	152.746
	257	157.561	131.261	151
	258	154.924	132.728	151.195
	259	160.626	145.515	155.978
	260	160.615	143.666	158.645
	261	160.62	141.24	162.208
	262	156.312	144.254	161.85
	263	154.239	142.45	161.831
	264	151.645	145.392	159.43
	265	141.556	152.287	157.997
	266	136.862	151.288	159.656
	267	136.422	152.664	159.683
	268	133.95	154.822	164.048
	269	134.577	155.522	160.224
	270	132.987	151.802	159.676
	271	127.275	149.216	159.463
	272	130.693	147.077	157.742
	273	134.879	145.928	156.33
	274	145.913	149.106	158.779
	275	151.296	153.228	159.65
	276	152.448	154.145	156.587
	277	145.855	150.859	155.302
	278	144.754	145.865	147.381
	279	141.747	140.953	152.844
	280	139.453	143.964	153.154
	281	138.248	137.767	157.163
	282	142.238	133.687	153.625
	283	146.119	125.717	154.301
	284	145.47	123.602	152.379
	285	145.989	124.519	147.267
	286	149.648	127.478	148.685
	287	148.059	124.784	155.207
	288	145.999	120.763	156.673
	289	148.13	124.212	154.748
	290	149.628	117.661	153.417
	291	153.198	117.057	152.644
	292	150.644	121.695	148.158
	293	150.691	128.359	144.833
	294	151.842	128.245	146.157
	295	153.484	126.223	144.075
	296	161.609	129.341	145.694
	297	165.388	125.03	147.091
	298	163.218	124.309	148.861
	299	155.659	127.141	155.51
	300	158.546	126.699	157.9
	301	158.134	133.411	161.922
	302	153.62	129.443	156.468
	303	150.79	128.374	155.7
	304	148.92	128.037	156.802
	305	152.557	123.752	155.377
	306	151.609	124.508	159.395
	307	150.495	123.057	160.29
	308	158.025	123.26	162.131
	309	158.721	120.83	157.01
	310	154.757	123.985	157.473
	311	153.102	128.904	159.053
	312	143.843	134.131	159.075
	313	146.496	126.184	161.779
	314	140.904	125.912	156.419
	315	145.861	122.407	158.078
	316	151.786	129.08	153.848
	317	151.045	133.757	154.278
	318	151.376	129.585	152.355
	319	145.851	130.903	152.124
	320	147.746	128.024	149.72
	321	147.96	123.395	151.291
	322	142.708	125.184	152.367
	323	142.201	125.597	154.73
	324	143.443	121.052	153.821
	325	141.444	119.565	155.534
	326	148.532	117.231	159.633
	327	153.831	118.777	158.953
	328	153.681	118.739	168.17
	329	146.693	118.955	168.131
	330	148.066	122.528	169.988
	331	145.833	122.542	168.22
	332	139.397	125.821	171.062
	333	144.731	122.95	168.234
	334	154.47	123.312	166.752
	335	157.695	125.62	163.239
	336	159.94	123.3	161.823
	337	158.281	124.074	165.692
	338	157.374	124.834	164.547
	339	162.864	127.803	164.815
	340	161.199	130.17	159.208
	341	163.951	130.353	161.418
	342	166.071	134.381	163.152
	343	158.542	132.415	161.566
	344	152.745	132.866	163.482
	345	144.538	142.9	159.277
	346	145.795	151.728	159.682
	347	143.397	157.007	156.801
	348	143.325	156.213	151.415
	349	145.214	158.735	149.988
	350	157.232	158.672	145.516
	351	160.687	167.195	146.132
	352	153.862	173.708	146.926
	353	148.526	172.78	149.856
	354	151.93	170.293	149.349
	355	155.402	168.063	151.951
	356	159.227	168.082	157.404
	357	156.036	165.718	155.82
	358	157.688	166.359	152.389
	359	161.877	167.433	158.23
	360	164.053	162.89	157.958
	361	168.816	164.553	156.889
	362	175.177	164.039	162.413
	363	171.969	162.974	163.319
	364	168.267	168.484	158.466
	365	164.72	156.464	154.457
	366	164.452	161.75	156.058
	367	161.301	157.056	161.683
	368	156.534	149.906	158.07
	369	165.066	149.281	155.606
	370	164.701	148.43	161.11
	371	165.505	145.546	155.681
	372	167.664	148.607	152.574
	373	171.093	152.813	153.398
	374	172.69	154.698	158.38
	375	175.629	154.848	155.013
	376	174.594	156.347	153.658
	377	174.904	150.788	153.858
	378	172.375	150.331	157.303
	379	171.043	144.254	160.124
	380	168.777	141.791	163.751
	381	164.656	141.493	168.391
	382	165.596	146.661	163.488
	383	163.061	151.653	162.496
	384	161.097	149.297	161.758
	385	165.898	148.343	163.654
	386	170.1	156.597	167.229
	387	171.659	163.609	173.247
	388	171.139	163.119	169.739
	389	171.929	160.441	162.108
	390	166.449	165.096	157.186
	391	162.371	169.524	157.303
	392	168.568	165.269	162.849
	393	161.188	166.907	167.339
	394	157.576	160.312	167.995
	395	153.476	162.003	161.036
	396	152.122	162.629	164.278
	397	153.986	165.379	161.124
	398	157.663	170.723	156.514
	399	156.489	170.412	149.135
	400	156.336	173.702	142.751
	401	155.451	176.509	135.928
	402	150.706	174.494	135.813
	403	152.85	177.095	140.22
	404	157.751	172.409	142.507
	405	153.928	179.017	145.634
	406	155.212	178.327	148.792
	407	161.99	173.758	153.053
	408	163.363	174.516	152.653
	409	163.047	173.429	155.369
	410	159.517	174.409	148.112
	411	151.623	177.338	148.5
	412	151.947	178.156	147.181
	413	157.287	169.817	145.336
	414	158.769	158.629	142.271
	415	146.159	148.792	140.517
	416	148.505	150.035	142.06
	417	151.132	150.329	145.731
	418	161.347	151.397	152.483
	419	154.663	153.85	149.915
	420	154.074	154.969	149.042
	421	150.539	158.723	141.264
	422	151.32	161.265	145.483
	423	150.726	166.893	145.985
	424	146.881	166.735	148.154
	425	148.698	164.374	146.146
	426	141	169.899	146.09
	427	142.335	168.444	149.243
	428	149.025	168.554	143.343
	429	149.643	173.674	140.804
	430	146.005	177.285	139.317
	431	149.184	176.329	136.539
	432	145.188	175.097	135.649
	433	141.313	171.676	140.469
	434	144.385	163.728	144.874
	435	143.013	157.77	145.729
	436	149.121	159.241	143.004
	437	137.876	160.669	147.413
	438	131.726	162.527	148.395
	439	127.467	166.595	146.909
	440	129.586	166.475	144.365
	441	130.829	164.781	144.469
	442	128.219	162.814	149.711
	443	128.776	159.031	148.326
	444	135.329	153.734	150.851
	445	136.472	157	142.617
	446	134.843	160.876	140.185
	447	132.384	161.589	135.756
	448	122.916	165.474	145.319
	449	123.77	163.365	144.108
	450	122.666	156.22	144.205
	451	123.797	150.425	144.717
	452	119.775	149.162	148.296
	453	119.847	158.424	153.012
	454	117.328	156.487	154.105
	455	113.289	156.922	146.453
	456	109.913	159.633	147.281
	457	113.996	157.91	147.797
	458	111.163	158.196	146.396
	459	107.41	151.238	151.334
	460	109.516	149.778	150.139
	461	112.223	149.012	148.331
	462	109.917	155.624	147.726
	463	110.505	154.57	140.538
	464	113.526	153.88	139.876
	465	110.114	153.003	140.883
	466	109.462	152.835	145.3
	467	108.447	153.696	152.419
	468	109.265	147.788	156.354
	469	115.083	143.435	150.62
	470	111.279	145.534	151.177
	471	105.606	151.754	153.885
	472	104.961	152.324	157.917
	473	101.144	155.603	163.073
	474	104.114	154.155	164.487
	475	107.302	144.944	166.975
	476	113.424	141.032	168.47
	477	118.073	139.532	162.392
	478	117.252	140.757	156.54
	479	121.503	140.698	156.357
	480	120.33	139.758	158.606
	481	121.988	133.262	160.94
	482	119.993	127.877	159.54
	483	115.499	125.256	164.618
	484	117.495	126.412	166.187
	485	122.915	134.563	161.748
	486	126.7	125.908	156.194
	487	122.843	121.557	165.693
	488	120.738	118.666	162.793
	489	126.812	120.529	166.523
	490	123.481	124.944	168.814
	491	123.2	127.75	162.559
	492	124.938	128.874	164.579
	493	128.285	133.807	163.756
	494	125.004	130.322	165.513
	495	127.159	123.876	166.902
	496	129.394	123.009	163.12
	497	133.902	127.428	168.41
	498	129.155	131.516	168.913
	499	132.493	129.646	171.321
	500	129.431	126.852	166.547
	501	127.654	122.856	166.112
	502	122.742	125.133	164.574
	503	120.8	133.382	155.793
	504	119.311	135.005	149.623
	505	117.743	137.637	150.102
	506	118.258	141.696	151.123
	507	114.238	147.433	158.126
	508	116.029	143.271	160.875
	509	120.116	142.31	162.485
	510	122.095	140.665	162.536
	511	126.418	135.968	156.226
	512	126.615	127.706	157.103
	513	124.436	124.303	149.791
	514	127.062	126.061	150.579
	515	125.361	123.655	147.668
	516	123.368	124.352	152.83
	517	124.217	125.983	150.647
	518	122.396	130.212	153.617
	519	124.184	131.673	155.772
	520	130.157	128.298	158.15
	521	126.865	123.731	155.293
	522	123.779	130.179	153.934
	523	124.268	129.142	153.678
	524	124.371	124.555	151.024
	525	127.078	121.025	146.607
	526	127.44	123.056	152.406
	527	126.26	116.826	149.94
	528	122.934	115.785	161.421
	529	126.808	116.282	157.268
	530	119.101	117.524	150.602
	531	121.254	117.995	149.523
	532	121.634	120.392	147.045
	533	120.479	119.173	149.799
	534	127.738	114.721	151.395
	535	126.01	120.254	155.574
	536	131.447	127.435	153.583
	537	129.596	126.379	152.244
	538	126.863	127.757	152.544
	539	125.269	125.555	152.921
	540	123.518	123.71	157.123
	541	119.077	118.479	165.368
	542	118.934	123.29	173.573
	543	114.542	123.215	177.136
	544	115.63	117.554	170.559
	545	117.95	114.599	164.856
	546	119.567	121.597	161.739
	547	123.473	116.605	163.332
	548	127.852	112.01	161.587
	549	123.483	112.374	158.435
	550	124.079	114.923	162.204
	551	122.647	113.421	160.113
	552	129.688	110.813	161.745
	553	133.147	115.869	162.684
	554	135.914	119.975	165.658
	555	138.89	121.777	175.009
	556	141.839	120.448	174.945
	557	136.647	119.769	172.839
	558	134.604	119.609	172.761
	559	132.711	119.39	170.396
	560	131.243	121.723	168.962
	561	138.282	119.605	164.557
	562	141.037	124.139	161.296
	563	144.93	121.64	157.061
	564	144.567	117.668	155.785
	565	140.184	117.151	153.64
	566	133.689	121.826	153.191
	567	131.66	123.869	157.457
	568	131.375	125.177	155.014
	569	131.59	121.254	157.639
	570	133.402	114.733	152.801
	571	138.777	114.455	154.827
	572	140.143	116.188	158.199
	573	139.456	112.789	159.38
	574	133.18	113.85	162.667
	575	126.163	114.53	161.805
	576	123.385	119.293	160.24
	577	121.558	121.843	156.63
	578	119.762	118.382	157.254
	579	119.628	119.251	157.457
	580	119.378	120.451	156.756
	581	122.329	118.588	162.651
	582	118.609	121.506	159.849
	583	118.964	122.16	163.503
	584	119.363	123.416	159.296
	585	118.866	123.181	164.507
	586	121.245	115.247	164.651
	587	120.065	120.32	162.881
	588	117.402	117.723	158.852
	589	117.728	116.274	160.638
	590	113.576	117.142	154.825
	591	111.801	119.625	156.635
	592	116.289	119.665	161.356
	593	112.268	120.937	158.909
	594	109.999	122.913	162.323
	595	113.124	126.546	159.988
	596	114.546	128.707	166.848
	597	114.154	126.934	164.816
	598	116.265	126.283	161.966
	599	119.462	128.369	167.12
	600	119.085	128.495	162.294
	601	114.696	128.861	162.137
	602	114.932	131.236	160.892
	603	116.455	129.489	159.805
	604	116.656	125.268	156.742
	605	118.328	126.975	156.385
	606	117.517	126.686	146.609
	607	112.26	129.837	146.151
	608	117.261	131.96	144.336
	609	119.115	124.859	142.437
	610	110.634	124.117	137.625
	611	105.883	129.388	135.428
	612	106.208	128.447	141.706
	613	108.22	125.085	141.1
	614	105.806	131.904	142.357
	615	104.19	132.321	141.847
	616	103.663	132.632	139.109
	617	108.87	140.091	138.51
	618	111.04	133.403	141.594
	619	107.05	125.569	142.895
	620	107.445	128.241	146.352
	621	110.364	129.244	149.777
	622	106.28	127.721	156.294
	623	102.953	119.546	157.844
	624	105.314	113.129	161.914
	625	108.212	113.735	162.138
	626	113.739	111.663	163.478
	627	119.219	107.163	157.464
	628	116.17	106.378	155.66
	629	113.203	103.749	160.194
	630	113.752	103.884	160.645
	631	115.102	102.241	158.905
	632	117.323	105.262	158.725
	633	112.05	100.505	161.578
	634	114.055	99.0168	166.824
	635	116.72	97.9142	163.982
	636	116.645	100.058	166.585
	637	119.973	98.9275	165.127
	638	123.115	99.2417	166.318
	639	122.912	95.2801	165.042
	640	124.342	94.2925	171.08
	641	126.401	89.4642	173.945
	642	128.398	86.4667	169.431
	643	124.742	86.9395	170.01
	644	128.484	86.4794	170.803
	645	132.968	86.5083	169.338
	646	129.046	80.9781	172.686
	647	124.426	81.5657	166.293
	648	123.605	84.9584	165.082
	649	123.886	88.6902	168.256
	650	127.789	90.0573	163.642
	651	124.736	95.2652	167.855
	652	118.603	96.8472	169.944
	653	118.282	91.0471	173.622
	654	119.836	84.4219	169.536
	655	117.899	79.367	166.345
	656	116.738	76.0377	168.982
	657	122.834	77.7147	166.938
	658	118.175	77.475	165.657
	659	120.832	72.8057	168.026
	660	120.014	71.2537	167.325
	661	124.073	79.0609	174.03
	662	128.475	77.5272	168.976
	663	133.216	82.1741	173.049
	664	131.818	79.3905	170.068
	665	132.958	80.5487	165.362
	666	126.051	83.9651	164.943
	667	126.702	85.8246	164.67
	668	119.323	84.9866	166.43
	669	117.424	87.8165	171.392
	670	116.55	91.2198	172.233
	671	114.198	94.2129	170.599
	672	114.235	89.6348	163.565
	673	111.796	87.2992	164.564
	674	115.762	87.6905	164.847
	675	119.757	85.089	161.517
	676	117.585	79.3635	159.443
	677	118.151	79.8281	162.912
	678	122.046	83.5196	164.682
	679	123.514	89.4939	170.325
	680	125.335	91.5075	172.68
	681	129.287	94.2469	172.587
	682	123.059	87.5635	172.459
	683	123.101	86.4064	171.252
	684	118.237	90.4088	168.053
	685	119.203	88.9646	170.587
	686	119.283	91.555	165.254
	687	119.012	90.0264	160.34
	688	118.726	88.303	158.654
	689	120.218	83.3324	159.298
	690	119.068	83.9604	158.438
	691	121.637	83.421	154.576
	692	122.383	82.638	155.432
	693	118.059	84.0937	158.906
	694	122.989	81.899	157.962
	695	122.501	84.9444	157.449
	696	122.796	86.7944	158.368
	697	113.524	85.2008	154.809
	698	109.909	90.7693	158.495
	699	107.236	87.4731	155.343
	700	105.575	88.2341	153.917
	701	107.951	87.7696	151.476
	702	111.394	87.3764	153.721
	703	116.289	84.8864	152.09
	704	114.702	86.4944	153.061
	705	110.087	88.4929	156.286
	706	111.869	89.4579	154.824
	707	113.308	86.1921	157.096
	708	111.694	82.3585	157.058
	709	113.519	81.3708	156.561
	710	110.061	84.1224	153.982
	711	110.582	82.0455	153.152
	712	105.281	82.5733	151.521
	713	104.61	86.6769	147.566
	714	112.465	88.5445	144.428
	715	115.256	89.4083	147.284
	716	109.473	89.4998	141.623
	717	106.378	82.3167	143.872
	718	108.616	84.9875	146.066
	719	109.564	87.8952	147.934
	720	107.919	94.1425	149.235
	721	110.98	92.7138	146.949
	722	110.014	89.5288	155.712
	723	112.102	90.1855	155.562
	724	109.385	91.3931	148.52
	725	110.205	92.7937	147.414
	726	111.718	87.4802	150.108
	727	113.045	88.8435	151.442
	728	109.902	82.2114	156.457
	729	116.504	78.1319	161.434
	730	116.178	76.0306	159.018
	731	124.106	70.7718	158.546
	732	118.211	72.6521	155.625
	733	118.662	73.7078	156.791
	734	118.681	72.6143	154.425
	735	117.563	75.6864	154.916
	736	120.279	73.1647	149.484
	737	123.856	73.1078	149.026
	738	118.651	71.946	157.344
	739	120.028	72.4037	160.277
	740	118.825	68.9352	161.999
	741	125.422	66.9008	160.075
	742	122.501	73.9342	155.985
	743	120.336	80.8114	158.977
	744	117.784	82.1896	157.346
	745	108.236	80.6296	156.873
	746	110.257	83.2333	149.966
	747	109.777	84.5789	144.59
	748	105.467	83.918	153.796
	749	107.17	86.0231	155.263
	750	114.947	78.3549	160.188
	751	117.204	82.1662	160.449
	752	114.126	79.6678	153.988
	753	116.424	77.3621	155.468
	754	114.338	74.0974	159.768
	755	107.834	77.1238	162.435
	756	107.318	72.9848	161.204
	757	112.436	73.8206	158.962
	758	112.965	76.3197	149.933
	759	112.242	78.223	146.594
	760	110.351	79.3875	140.125
	761	108.929	83.9865	144.282
	762	111.701	83.8948	150.033
	763	110.738	87.7868	142.361
	764	107.186	89.1138	136.483
	765	107.036	92.0865	138.72
	766	105.273	93.7207	133.895
	767	104.829	98.3468	139.766
	768	101.796	100.913	134.815
	769	103.297	104.413	141.189
	770	102.926	109.918	142.885
	771	112.086	112.499	144.636
	772	107.813	114.893	146.078
	773	107.394	113.951	149.084
	774	101.629	120.656	148.089
	775	107.07	119.999	147.072
	776	111.296	117.611	145.581
	777	110.423	116.32	142.616
	778	111.1	114.329	148.618
	779	115.198	117.006	154.385
	780	109.433	119.716	153.729
	781	105.299	113.437	154.211
	782	100.748	116.956	160.529
	783	100.431	114.535	161.981
	784	103.385	113.563	167.642
	785	104.281	109.702	164.159
	786	103.697	109.983	161.783
	787	104.55	107.744	160.742
	788	103.309	106.849	160.254
	789	100.815	106.756	166.318
	790	98.3208	106.288	161.219
	791	94.1039	100.128	157.948
	792	98.6406	98.7796	156.381
	793	100.694	97.8443	150.07
	794	98.9003	95.3041	152.418
	795	99.672	92.6224	153.72
	796	101.851	93.1777	152.03
	797	98.4257	97.5012	154.873
	798	100.743	96.443	153.662
	799	98.7513	101.398	151.961
	800	100.165	100.073	151.524
	801	106.084	102.984	152.959
	802	101.715	95.9856	157.24
	803	104.398	93.2727	158.343
	804	104.583	92.3304	161.581
	805	106.258	92.8346	157.17
	806	100.112	94.2004	163.236
	807	98.6349	93.0039	158.419
	808	97.1098	91.4459	157.309
	809	100.537	92.1971	154.298
	810	101.915	94.4018	151.85
	811	105.144	98.4052	154.493
	812	106.936	96.0061	151.242
	813	106.775	90.4307	145.939
	814	107.119	89.5805	150.188
	815	104.381	91.5498	153.999
	816	102.161	86.7558	147.685
	817	96.8577	88.5902	146.24
	818	101.11	86.0159	148.192
	819	101.994	91.6288	148.005
	820	99.3996	96.5348	149.021
	821	107.567	100.071	150.798
	822	109.403	98.3845	151.419
	823	108.14	96.3932	155.328
	824	106.898	97.6985	156.686
	825	109.186	93.2028	157.724
	826	109.096	93.497	162.868
	827	109.491	93.7763	152.463
	828	107.504	94.8985	153.03
	829	103.08	98.1034	154.566
	830	101.748	95.2839	149.463
	831	103.496	94.0451	147.881
	832	100.708	94.1623	147.2
	833	101.311	93.132	144.695
	834	99.2908	92.5543	145.723
	835	103.114	95.4998	146.062
	836	105.444	94.6949	141.495
	837	101.229	92.3338	142.546
	838	98.1488	93.669	143.254
	839	98.6667	93.9699	144.954
	840	96.9505	95.6415	154.956
	841	95.6382	89.1176	157.788
	842	98.3378	88.368	151.916
	843	98.9011	82.7579	150.869
	844	99.1825	80.4996	155.502
	845	97.9153	74.5023	153.688
	846	101.255	73.7796	151.083
	847	102.822	74.6043	153.363
	848	98.6818	77.2224	152.135
	849	98.8785	77.6627	153.83
	850	97.972	75.7591	157.25
	851	98.1424	78.9884	154.838
	852	97.1925	87.5684	157.861
	853	100.072	86.6695	157.572
	854	99.7696	86.1579	153.195
	855	100.154	88.2057	155.543
	856	104.081	87.3898	152.855
	857	106.46	89.4959	155.31
	858	103.743	94.1026	151.817
	859	106.398	94.2606	154.713
	860	110.336	88.0827	156.809
	861	113.514	92.3329	161.918
	862	113.275	95.6331	154.413
	863	116.547	90.0847	156.593
	864	118.673	94.275	157.144
	865	115.063	93.8646	159.805
	866	115.516	95.1397	166.385
	867	116.582	94.8013	166.858
	868	116.48	94.2861	163.178
	869	115.011	98.8473	162.004
	870	105.008	93.1187	159.101
	871	102.643	92.329	156.119
	872	107.456	91.1465	156.287
	873	100.291	89.3503	157.474
	874	104.362	90.4067	154.62
	875	105.644	87.1969	151.365
	876	103.365	91.0945	151.517
	877	99.5586	88.6886	151.778
	878	101.296	82.8733	156.32
	879	97.8843	83.6125	157.775
	880	103.338	86.6939	153.852
	881	104.172	86.9929	150.719
	882	107.032	79.8049	147.599
	883	102.1	73.9501	148.864
	884	99.2296	74.3407	147.914
	885	104.406	72.3621	151.359
	886	105.773	76.3076	150.593
	887	105.744	72.1444	151.953
	888	108.029	69.361	156.31
	889	110.316	72.1341	151.912
	890	109.685	70.9656	153.648
	891	111.311	73.6319	153.85
	892	108.07	73.1057	153.622
	893	100.698	72.621	153.1
	894	95.3458	74.0421	154.568
	895	100.243	71.7681	156.939
	896	99.1278	66.2144	158.872
	897	92.8839	69.2392	159.279
	898	96.6843	72.1299	157.698
	899	97.3866	74.8661	162.962
	900	100.215	74.462	162.789
	901	99.9049	68.9146	161.209
	902	101.111	69.432	160.583
	903	98.1904	64.8448	158.264
	904	93.9017	69.0777	157.66
	905	94.0455	72.4924	154.197
	906	91.5711	72.9176	158.319
	907	89.1911	72.2551	156.942
	908	89.8608	73.32	161.798
	909	94.7254	75.6744	158.283
	910	105.979	79.1459	153.994
	911	100.825	80.1646	160.448
	912	103.425	76.6484	154.596
	913	97.9254	75.9966	155.152
	914	98.3463	70.2581	149.759
	915	103.537	69.6267	148.394
	916	101.139	72.126	146.185
	917	98.7334	65.3656	149.231
	918	101.397	63.0038	155.081
	919	106.518	63.7275	154.844
	920	104.855	67.5785	159.075
	921	106.919	69.0717	161.683
	922	104.319	73.2693	163.992
	923	102.65	71.194	160.891
	924	100.689	71.8877	165.915
	925	99.7244	76.8356	162.86
	926	100.626	74.9292	166.769
	927	105.357	69.3205	172.399
	928	107.558	70.7647	163.039
	929	109.41	72.9822	163.669
	930	107.001	76.3777	166.413
	931	102.474	81.3576	170.689
	932	100.382	80.7697	169.463
	933	105.882	87.7567	165.575
	934	109.733	90.8106	170.8
	935	114.6	88.6152	166.232
	936	112.205	86.5372	164.05
	937	111.908	87.4841	158.208
	938	108.228	82.8062	159.067
	939	99.4281	80.9963	160.193
	940	97.3629	89.5926	164.741
	941	94.1066	87.4823	163.406
	942	93.6132	87.9979	167.504
	943	101.048	87.983	168.96
	944	109.531	84.5028	175.949
	945	107.382	85.0927	172.353
	946	104.493	86.7288	171.527
	947	98.5965	88.6511	169.929
	948	96.4475	89.3307	170.63
	949	97.4038	89.2332	171.251
	950	99.9746	91.581	165.43
	951	100.819	92.3527	167.882
	952	102.586	90.0319	171.198
	953	110.409	96.7249	166
	954	109.251	98.0853	162.158
	955	106.835	98.4277	161.373
	956	109.639	101.728	161.91
	957	117.17	96.6358	156.926
	958	118.654	95.5051	157.692
	959	119.834	101.891	160.647
	960	126.476	103.013	163.109
	961	120.605	106.934	168.288
	962	122.994	112.209	168.066
	963	121.483	113.501	172.308
	964	116.609	116.26	166.547
	965	113.636	111.204	169.655
	966	112.044	112.062	160.864
	967	111.153	114.043	161.44
	968	114.116	115.133	165.15
	969	109.667	116.966	164.495
	970	112.605	118.648	162.289
	971	113.644	122.026	163.752
	972	116.1	123.926	166.882
	973	119.612	122.727	161.758
	974	117.254	122.387	157.939
	975	117.57	119.477	164.396
	976	115.319	118.586	163.182
	977	115.947	119.981	160.157
	978	114.538	119.788	155.418
	979	116.968	114.605	150.42
	980	118.539	114.657	154.78
	981	107.967	111.931	156.704
	982	108.339	105.319	158.921
	983	104.196	105.199	162.59
	984	108.522	103.731	162.558
	985	110.604	101.575	160.681
	986	112.999	105.991	158.177
	987	112.517	103.231	157.751
	988	111.711	103.719	154.307
	989	113.087	103.776	154.172
	990	114.882	103.44	153.549
	991	114.147	107.279	156.981
	992	114.207	106.308	153.141
	993	110.088	104.082	149.517
	994	114.972	102.929	139.241
	995	110.147	105.513	142.804
	996	112.237	103.222	142.53
	997	108.952	105.124	147.489
	998	109.53	102.232	154.834

## Sheet: Fig. 5
	Fig. 5c					Fig. 5d
	Expression (Sum Intensity HA/Phalloidin)					Relative Expression (Fold/WT)
	EV	WT (1)	ΔCADH1-8 (2)	ΔCADH9-GAIN (3)		EV	WT (1)	ΔCADH1-8 (2)	ΔCADH9-GAIN (3)
	0.050401	0.459288	2.22621	0.583654		0.050401	0.626074	3.03464	0.795603
	0.18141	0.945896	1.48173	1.03615		0.18141	1.28939	2.01981	1.41242
	0.012115	0.795557	1.6191	0.777369		0.012115	1.08446	2.20706	1.05966
	Fig. 5f					Fig. 5g
	Aggregation Index (%)					Aggregation Index Normalized to Relative Expression (%)
	EV	WT (1)	ΔCADH1-8 (2)	ΔCADH9-GAIN (3)		EV	WT (1)	ΔCADH1-8 (2)	ΔCADH9-GAIN (3)
	2	26	1	8		2	26	0.413052	7.34619
	12	31	1	12		12	31	0.413052	11.0193
	12	32	1	18		12	32	0.413052	16.5289
	13	37	2	19		13	37	0.826105	17.4472
	13	39	2	22		13	39	0.826105	20.202
	13	42	5	24		13	42	2.06526	22.0386
	14	45	9	25		14	45	3.71747	22.9568
	14	45	13	35		14	45	5.36968	32.1396
	15	50	13	36		15	50	5.36968	33.0579
	16	51	14	36		16	51	5.78273	33.0579
	17	52	15	37		17	52	6.19579	33.9761
	17	55	17	39		17	55	7.02189	35.8127
	Fig. 5i					Fig. 5j
	Relative Junction Enrichment					Relative Junction Enrichment Normalized to Relative Expression
	EV	WT (1)	ΔCADH1-8 (2)	ΔCADH9-GAIN (3)		EV	WT (1)	ΔCADH1-8 (2)	ΔCADH9-GAIN (3)
	0.849476	7.87892	1.64388	7.92857		0.849476	7.87892	0.679007	7.2806
	0.746815	4.85853	1.41786	5.97116		0.746815	4.85853	0.585649	5.48316
	0.895151	3.78607	3.60604	9.41141		0.895151	3.78607	1.48948	8.64225
	1.71928	2.67016	1.45041	5.20933		1.71928	2.67016	0.599097	4.78359
	1.82651	2.93203	1.9036	5.88801		1.82651	2.93203	0.786287	5.4068
	0	3.74692	1.99112	6.6402		0	3.74692	0.822435	6.09752
	1.38111	5.64312	1.65238	4.95732		1.38111	5.64312	0.682519	4.55218
	0.999397	3.08771	2.04414	7.18592		0.999397	3.08771	0.844339	6.59864
	0.944613	5.72331	1.58427	4.1543		0.944613	5.72331	0.654388	3.81479

## Sheet: Fig. 6
	Fig. 6b						Fig. 6c
	Expression (Sum Intensity HA/Phalloidin)						Relative Expression (Fold/WT)
	EV	WT	LF	LY	NRY		EV	WT	LF	LY	NRY
	0.050401	0.459288	0.803897	0.52949	0.519949		0.050401	0.626074	1.09582	0.721769	0.708764
	0.18141	0.945896	0.395367	0.874474	0.868499		0.18141	1.28939	0.538941	1.19203	1.18389
	0.012115	0.795557	0.860039	0.75645	0.694389		0.012115	1.08446	1.17235	1.03115	0.94655
	Fig. 6e						Fig. 6f
	Aggregation Index (%)						Aggregation Index Normalized to Relative Expression (%)
	EV	WT	LF	LY	NRY		EV	WT	LF	LY	NRY
	0.212246	0.241825	0.366686	0.311731	0.187481		0.212246	0.258636	0.373788	0.329525	0.187481
	0.183644	0.364155	0.386998	0.334615	0.199242		0.183644	0.389471	0.394493	0.353716	0.199242
	0.183578	0.41534	0.387178	0.358612	0.205631		0.183578	0.444214	0.394677	0.379082	0.205631
	0.168247	0.419085	0.392963	0.385439	0.208802		0.168247	0.448219	0.400574	0.407441	0.208802
	0.146265	0.44961	0.404194	0.442148	0.225268		0.146265	0.480866	0.412022	0.467387	0.225268
	0.140399	0.453325	0.405633	0.445849	0.225706		0.140399	0.48484	0.413489	0.471299	0.225706
	0.139297	0.457289	0.437688	0.466332	0.261587		0.139297	0.489079	0.446165	0.492951	0.261587
	0.135024	0.459851	0.459479	0.475279	0.264471		0.135024	0.491819	0.468378	0.502409	0.264471
	0.130483	0.462476	0.468232	0.477064	0.301572		0.130483	0.494627	0.477301	0.504296	0.301572
	0.126106	0.464817	0.473359	0.487698	0.31159		0.126106	0.49713	0.482527	0.515537	0.31159
	0.123656	0.478369	0.476954	0.502455	0.315385		0.123656	0.511625	0.486192	0.531136	0.315385
	0.122357	0.498399	0.478527	0.504001	0.33408		0.122357	0.533047	0.487795	0.532771	0.33408
	0.115979	0.501907	0.480033	0.523396	0.349933		0.115979	0.536799	0.48933	0.553273	0.349933
	0.113987	0.505567	0.550046	0.53122	0.35032		0.113987	0.540713	0.560699	0.561543	0.35032
	0.11278	0.507022	0.552105	0.533975	0.367169		0.11278	0.54227	0.562798	0.564456	0.367169
	0.112201	0.507177	0.553236	0.540272	0.38604		0.112201	0.542435	0.563951	0.571112	0.38604
	0.099456	0.515789	0.586559	0.553876	0.392355		0.099456	0.551646	0.597919	0.585493	0.392355
	0.097472	0.5532	0.622927	0.558807	0.411524		0.097472	0.591658	0.634992	0.590705	0.411524
	0.092898	0.561043	0.624543	0.576174	0.429582		0.092898	0.600046	0.636639	0.609063	0.429582
	0.092685	0.57914	0.668646	0.599148	0.492132		0.092685	0.619401	0.681596	0.633349	0.492132
	0.090253	0.602069	0.678103	0.617888	0.501162		0.090253	0.643924	0.691236	0.653159	0.501162

## Sheet: Supplementary Fig. 1
	Supplementary Fig. 1b
	A280 (mAU) vs. Elution Volume (mL)
	Elution Volume (mL)	A280 (mAU)
	10.0004	0.834886
	10.0012	0.83681
	10.002	0.837445
	10.0029	0.837383
	10.0037	0.836899
	10.0045	0.836543
	10.0054	0.836139
	10.0062	0.837073
	10.007	0.837983
	10.0079	0.838114
	10.0087	0.838236
	10.0095	0.838655
	10.0104	0.839015
	10.0112	0.839684
	10.012	0.839949
	10.0129	0.840541
	10.0137	0.841259
	10.0145	0.841058
	10.0153	0.841129
	10.0162	0.842147
	10.017	0.843451
	10.0178	0.844328
	10.0187	0.845151
	10.0195	0.845161
	10.0203	0.84497
	10.0212	0.846179
	10.022	0.847596
	10.0228	0.848315
	10.0237	0.848886
	10.0245	0.84931
	10.0253	0.850321
	10.0262	0.851638
	10.027	0.85303
	10.0278	0.854007
	10.0287	0.854993
	10.0295	0.856553
	10.0303	0.85851
	10.0312	0.860142
	10.032	0.860932
	10.0328	0.861625
	10.0337	0.862452
	10.0345	0.863462
	10.0353	0.864888
	10.0362	0.86552
	10.037	0.865393
	10.0378	0.866
	10.0387	0.866904
	10.0395	0.867556
	10.0403	0.868055
	10.0411	0.868632
	10.042	0.869161
	10.0428	0.869622
	10.0436	0.870436
	10.0445	0.87136
	10.0453	0.873262
	10.0461	0.874637
	10.047	0.876017
	10.0478	0.876984
	10.0486	0.878072
	10.0495	0.879944
	10.0503	0.881278
	10.0511	0.881824
	10.052	0.882078
	10.0528	0.882302
	10.0536	0.882878
	10.0545	0.883253
	10.0553	0.88402
	10.0561	0.884632
	10.057	0.884688
	10.0578	0.885292
	10.0586	0.886006
	10.0595	0.885905
	10.0603	0.885982
	10.0611	0.88761
	10.062	0.889712
	10.0628	0.890046
	10.0636	0.889809
	10.0645	0.890879
	10.0653	0.891612
	10.0661	0.892705
	10.0669	0.893484
	10.0678	0.893238
	10.0686	0.892955
	10.0694	0.893695
	10.0703	0.894556
	10.0711	0.895131
	10.0719	0.895338
	10.0728	0.895217
	10.0736	0.895446
	10.0744	0.896321
	10.0753	0.896914
	10.0761	0.89714
	10.0769	0.897426
	10.0778	0.898669
	10.0786	0.900444
	10.0794	0.901191
	10.0803	0.901541
	10.0811	0.902342
	10.0819	0.904031
	10.0828	0.905505
	10.0836	0.906105
	10.0844	0.905888
	10.0853	0.905772
	10.0861	0.906339
	10.0869	0.906501
	10.0878	0.907395
	10.0886	0.909036
	10.0894	0.910218
	10.0902	0.911259
	10.0911	0.911601
	10.0919	0.911767
	10.0927	0.912185
	10.0936	0.912621
	10.0944	0.913943
	10.0952	0.915559
	10.0961	0.916992
	10.0969	0.918429
	10.0977	0.919476
	10.0986	0.920571
	10.0994	0.921191
	10.1002	0.922069
	10.1011	0.923427
	10.1019	0.924424
	10.1027	0.924166
	10.1036	0.923816
	10.1044	0.924347
	10.1052	0.92463
	10.1061	0.925385
	10.1069	0.927265
	10.1077	0.929095
	10.1086	0.930174
	10.1094	0.931603
	10.1102	0.932245
	10.1111	0.932492
	10.1119	0.933123
	10.1127	0.934236
	10.1136	0.935321
	10.1144	0.936585
	10.1152	0.937775
	10.116	0.938221
	10.1169	0.93902
	10.1177	0.940241
	10.1185	0.941771
	10.1194	0.941918
	10.1202	0.941823
	10.121	0.942077
	10.1219	0.942601
	10.1227	0.943338
	10.1235	0.942991
	10.1244	0.943289
	10.1252	0.94416
	10.126	0.945107
	10.1269	0.945816
	10.1277	0.946481
	10.1285	0.947391
	10.1294	0.947903
	10.1302	0.947815
	10.131	0.948598
	10.1319	0.94933
	10.1327	0.950145
	10.1335	0.95091
	10.1344	0.95253
	10.1352	0.954044
	10.136	0.954711
	10.1369	0.955505
	10.1377	0.956049
	10.1385	0.955912
	10.1394	0.956406
	10.1402	0.957496
	10.141	0.958749
	10.1418	0.959885
	10.1427	0.960548
	10.1435	0.961427
	10.1443	0.962471
	10.1452	0.963648
	10.146	0.964465
	10.1468	0.965664
	10.1477	0.966646
	10.1485	0.966812
	10.1493	0.96632
	10.1502	0.967001
	10.151	0.967807
	10.1518	0.968432
	10.1527	0.969142
	10.1535	0.969254
	10.1543	0.970205
	10.1552	0.971345
	10.156	0.971977
	10.1568	0.973123
	10.1577	0.974541
	10.1585	0.975514
	10.1593	0.975762
	10.1602	0.975663
	10.161	0.975744
	10.1618	0.976233
	10.1627	0.977571
	10.1635	0.978753
	10.1643	0.979976
	10.1651	0.981449
	10.166	0.98258
	10.1668	0.983553
	10.1676	0.984728
	10.1685	0.986492
	10.1693	0.988577
	10.1701	0.989547
	10.171	0.989728
	10.1718	0.990649
	10.1726	0.991147
	10.1735	0.991762
	10.1743	0.991914
	10.1751	0.992515
	10.176	0.992651
	10.1768	0.993223
	10.1776	0.99437
	10.1785	0.994821
	10.1793	0.995709
	10.1801	0.997119
	10.181	0.998774
	10.1818	1.00006
	10.1826	1.00117
	10.1835	1.00171
	10.1843	1.00224
	10.1851	1.00363
	10.186	1.00436
	10.1868	1.00463
	10.1876	1.00581
	10.1885	1.00746
	10.1893	1.00851
	10.1901	1.0096
	10.1909	1.01048
	10.1918	1.01075
	10.1926	1.01157
	10.1934	1.0127
	10.1943	1.01406
	10.1951	1.01596
	10.1959	1.0167
	10.1968	1.01642
	10.1976	1.01702
	10.1984	1.01762
	10.1993	1.01809
	10.2001	1.01895
	10.2009	1.02045
	10.2018	1.02246
	10.2026	1.02382
	10.2034	1.02505
	10.2043	1.02627
	10.2051	1.02649
	10.2059	1.0268
	10.2068	1.02717
	10.2076	1.02762
	10.2084	1.02858
	10.2093	1.02983
	10.2101	1.02996
	10.2109	1.02963
	10.2118	1.03062
	10.2126	1.03187
	10.2134	1.0324
	10.2142	1.03341
	10.2151	1.034
	10.2159	1.03477
	10.2167	1.03652
	10.2176	1.03818
	10.2184	1.03916
	10.2192	1.04011
	10.2201	1.04124
	10.2209	1.0424
	10.2217	1.04355
	10.2226	1.0444
	10.2234	1.04509
	10.2242	1.0455
	10.2251	1.04673
	10.2259	1.04809
	10.2267	1.04862
	10.2276	1.04884
	10.2284	1.05083
	10.2292	1.05187
	10.2301	1.05223
	10.2309	1.05327
	10.2317	1.05407
	10.2326	1.05498
	10.2334	1.0566
	10.2342	1.05773
	10.2351	1.05879
	10.2359	1.05925
	10.2367	1.0588
	10.2376	1.05973
	10.2384	1.06156
	10.2392	1.06302
	10.24	1.06392
	10.2409	1.06462
	10.2417	1.06547
	10.2425	1.06589
	10.2434	1.06544
	10.2442	1.06599
	10.245	1.06736
	10.2459	1.06802
	10.2467	1.06897
	10.2475	1.06881
	10.2484	1.06999
	10.2492	1.07089
	10.25	1.07197
	10.2509	1.07207
	10.2517	1.073
	10.2525	1.07448
	10.2534	1.07553
	10.2542	1.07639
	10.255	1.0781
	10.2559	1.07887
	10.2567	1.07978
	10.2575	1.08092
	10.2584	1.08207
	10.2592	1.08309
	10.26	1.08367
	10.2609	1.08445
	10.2617	1.08531
	10.2625	1.0867
	10.2634	1.08744
	10.2642	1.08824
	10.265	1.0891
	10.2658	1.09028
	10.2667	1.09163
	10.2675	1.09306
	10.2683	1.09439
	10.2692	1.09608
	10.27	1.09678
	10.2708	1.09753
	10.2717	1.09795
	10.2725	1.09841
	10.2733	1.0987
	10.2742	1.09995
	10.275	1.10089
	10.2758	1.10183
	10.2767	1.1033
	10.2775	1.10442
	10.2783	1.10664
	10.2792	1.10752
	10.28	1.10891
	10.2808	1.10957
	10.2817	1.10992
	10.2825	1.11162
	10.2833	1.11234
	10.2842	1.11317
	10.285	1.11427
	10.2858	1.11612
	10.2867	1.11733
	10.2875	1.1191
	10.2883	1.12061
	10.2891	1.12302
	10.29	1.12383
	10.2908	1.1255
	10.2916	1.12547
	10.2925	1.12708
	10.2933	1.12774
	10.2941	1.12854
	10.295	1.1297
	10.2958	1.13089
	10.2966	1.13203
	10.2975	1.13296
	10.2983	1.13439
	10.2991	1.13625
	10.3	1.137
	10.3008	1.13715
	10.3016	1.13841
	10.3025	1.13939
	10.3033	1.14095
	10.3041	1.14137
	10.305	1.14156
	10.3058	1.14268
	10.3066	1.14375
	10.3075	1.14385
	10.3083	1.14406
	10.3091	1.14409
	10.31	1.145
	10.3108	1.14549
	10.3116	1.14675
	10.3125	1.14762
	10.3133	1.14887
	10.3141	1.14996
	10.3149	1.15145
	10.3158	1.15189
	10.3166	1.15246
	10.3174	1.15292
	10.3183	1.15317
	10.3191	1.15379
	10.3199	1.15441
	10.3208	1.15536
	10.3216	1.15485
	10.3224	1.15516
	10.3233	1.15625
	10.3241	1.15675
	10.3249	1.15784
	10.3258	1.15891
	10.3266	1.16023
	10.3274	1.16096
	10.3283	1.16115
	10.3291	1.16024
	10.3299	1.16139
	10.3308	1.16206
	10.3316	1.16412
	10.3324	1.16483
	10.3333	1.16661
	10.3341	1.16737
	10.3349	1.16894
	10.3358	1.1706
	10.3366	1.17114
	10.3374	1.17052
	10.3383	1.17131
	10.3391	1.17279
	10.3399	1.17328
	10.3407	1.17472
	10.3416	1.17567
	10.3424	1.177
	10.3432	1.17805
	10.3441	1.17895
	10.3449	1.1793
	10.3457	1.18004
	10.3466	1.18136
	10.3474	1.18204
	10.3482	1.18305
	10.3491	1.1849
	10.3499	1.18733
	10.3507	1.18975
	10.3516	1.18994
	10.3524	1.19038
	10.3532	1.19154
	10.3541	1.19303
	10.3549	1.19459
	10.3557	1.19594
	10.3566	1.19699
	10.3574	1.19859
	10.3582	1.19866
	10.3591	1.19981
	10.3599	1.20133
	10.3607	1.20188
	10.3616	1.20323
	10.3624	1.20364
	10.3632	1.20568
	10.364	1.20833
	10.3649	1.20971
	10.3657	1.21096
	10.3665	1.21237
	10.3674	1.21362
	10.3682	1.21462
	10.369	1.21513
	10.3699	1.21686
	10.3707	1.21849
	10.3715	1.2187
	10.3724	1.21963
	10.3732	1.21952
	10.374	1.22098
	10.3749	1.22188
	10.3757	1.22292
	10.3765	1.22373
	10.3774	1.22415
	10.3782	1.22518
	10.379	1.22677
	10.3799	1.22786
	10.3807	1.22883
	10.3815	1.23044
	10.3824	1.23114
	10.3832	1.2318
	10.384	1.2326
	10.3849	1.23364
	10.3857	1.23477
	10.3865	1.23676
	10.3874	1.23841
	10.3882	1.23986
	10.389	1.2415
	10.3898	1.24263
	10.3907	1.24424
	10.3915	1.24439
	10.3923	1.24505
	10.3932	1.24701
	10.394	1.24937
	10.3948	1.2497
	10.3957	1.2509
	10.3965	1.25168
	10.3973	1.25271
	10.3982	1.25368
	10.399	1.25472
	10.3998	1.25697
	10.4007	1.25766
	10.4015	1.25844
	10.4023	1.26036
	10.4032	1.26259
	10.404	1.264
	10.4048	1.26523
	10.4057	1.26603
	10.4065	1.26704
	10.4073	1.26822
	10.4082	1.26946
	10.409	1.27167
	10.4098	1.27226
	10.4107	1.27435
	10.4115	1.27547
	10.4123	1.27658
	10.4131	1.27813
	10.414	1.27947
	10.4148	1.28133
	10.4156	1.28182
	10.4165	1.28281
	10.4173	1.2839
	10.4181	1.28478
	10.419	1.28698
	10.4198	1.28839
	10.4206	1.28924
	10.4215	1.29039
	10.4223	1.29081
	10.4231	1.29235
	10.424	1.29291
	10.4248	1.29487
	10.4256	1.29699
	10.4265	1.29848
	10.4273	1.30027
	10.4281	1.30111
	10.429	1.30215
	10.4298	1.30355
	10.4306	1.30344
	10.4315	1.30472
	10.4323	1.30559
	10.4331	1.30686
	10.434	1.30719
	10.4348	1.30902
	10.4356	1.30952
	10.4365	1.31113
	10.4373	1.3125
	10.4381	1.31321
	10.4389	1.31433
	10.4398	1.31605
	10.4406	1.31753
	10.4414	1.31889
	10.4423	1.32044
	10.4431	1.32154
	10.4439	1.32295
	10.4448	1.32373
	10.4456	1.32477
	10.4464	1.32627
	10.4473	1.3275
	10.4481	1.32839
	10.4489	1.32948
	10.4498	1.33054
	10.4506	1.3314
	10.4514	1.33292
	10.4523	1.334
	10.4531	1.3348
	10.4539	1.33678
	10.4548	1.33748
	10.4556	1.33925
	10.4564	1.34084
	10.4573	1.34166
	10.4581	1.34327
	10.4589	1.34408
	10.4598	1.3457
	10.4606	1.34667
	10.4614	1.34871
	10.4623	1.35169
	10.4631	1.35284
	10.4639	1.35411
	10.4647	1.3551
	10.4656	1.35689
	10.4664	1.35817
	10.4672	1.3582
	10.4681	1.35983
	10.4689	1.36033
	10.4697	1.36211
	10.4706	1.3633
	10.4714	1.36431
	10.4722	1.366
	10.4731	1.36763
	10.4739	1.36821
	10.4747	1.36865
	10.4756	1.37092
	10.4764	1.37172
	10.4772	1.37417
	10.4781	1.3749
	10.4789	1.37569
	10.4797	1.3779
	10.4806	1.37953
	10.4814	1.38037
	10.4822	1.38111
	10.4831	1.38223
	10.4839	1.38434
	10.4847	1.387
	10.4856	1.38826
	10.4864	1.38951
	10.4872	1.39108
	10.488	1.3923
	10.4889	1.39326
	10.4897	1.39478
	10.4905	1.39635
	10.4914	1.39798
	10.4922	1.39928
	10.493	1.40124
	10.4939	1.40276
	10.4947	1.40477
	10.4955	1.40556
	10.4964	1.40778
	10.4972	1.40892
	10.498	1.40993
	10.4989	1.41118
	10.4997	1.41222
	10.5005	1.41339
	10.5014	1.41448
	10.5022	1.41503
	10.503	1.41598
	10.5039	1.4172
	10.5047	1.41878
	10.5055	1.42144
	10.5064	1.42245
	10.5072	1.42333
	10.508	1.42461
	10.5089	1.42637
	10.5097	1.42727
	10.5105	1.42914
	10.5114	1.4298
	10.5122	1.43057
	10.513	1.4319
	10.5138	1.43457
	10.5147	1.43562
	10.5155	1.43777
	10.5163	1.44061
	10.5172	1.44265
	10.518	1.44274
	10.5188	1.44397
	10.5197	1.44571
	10.5205	1.4471
	10.5213	1.44853
	10.5222	1.45033
	10.523	1.4528
	10.5238	1.4547
	10.5247	1.45698
	10.5255	1.45856
	10.5263	1.45893
	10.5272	1.46015
	10.528	1.4611
	10.5288	1.46211
	10.5297	1.46335
	10.5305	1.46491
	10.5313	1.46717
	10.5322	1.46974
	10.533	1.47158
	10.5338	1.47276
	10.5347	1.47361
	10.5355	1.47518
	10.5363	1.47661
	10.5372	1.47878
	10.538	1.47948
	10.5388	1.4813
	10.5396	1.4833
	10.5405	1.48582
	10.5413	1.48732
	10.5421	1.48925
	10.543	1.4908
	10.5438	1.49316
	10.5446	1.49484
	10.5455	1.49629
	10.5463	1.49783
	10.5471	1.49894
	10.548	1.50074
	10.5488	1.5027
	10.5496	1.50425
	10.5505	1.50588
	10.5513	1.5077
	10.5521	1.50908
	10.553	1.51106
	10.5538	1.51283
	10.5546	1.51423
	10.5555	1.51458
	10.5563	1.51644
	10.5571	1.51876
	10.558	1.52042
	10.5588	1.52115
	10.5596	1.52325
	10.5605	1.5243
	10.5613	1.52507
	10.5621	1.52644
	10.5629	1.52791
	10.5638	1.5287
	10.5646	1.5293
	10.5654	1.5303
	10.5663	1.53076
	10.5671	1.53123
	10.5679	1.53248
	10.5688	1.53356
	10.5696	1.5358
	10.5704	1.5377
	10.5713	1.53946
	10.5721	1.54097
	10.5729	1.54177
	10.5738	1.54218
	10.5746	1.54301
	10.5754	1.54464
	10.5763	1.5467
	10.5771	1.54882
	10.5779	1.54968
	10.5788	1.5505
	10.5796	1.55245
	10.5804	1.55372
	10.5813	1.55452
	10.5821	1.55585
	10.5829	1.55748
	10.5838	1.55953
	10.5846	1.56168
	10.5854	1.56273
	10.5863	1.56507
	10.5871	1.56604
	10.5879	1.56738
	10.5887	1.5688
	10.5896	1.57029
	10.5904	1.57222
	10.5912	1.5742
	10.5921	1.57592
	10.5929	1.57773
	10.5937	1.57966
	10.5946	1.58096
	10.5954	1.58266
	10.5962	1.5844
	10.5971	1.58632
	10.5979	1.58758
	10.5987	1.58831
	10.5996	1.58956
	10.6004	1.59117
	10.6012	1.59315
	10.6021	1.59521
	10.6029	1.59658
	10.6037	1.59835
	10.6046	1.60025
	10.6054	1.6019
	10.6062	1.60303
	10.6071	1.60458
	10.6079	1.60682
	10.6087	1.60902
	10.6096	1.61135
	10.6104	1.61329
	10.6112	1.61476
	10.612	1.61718
	10.6129	1.61867
	10.6137	1.61988
	10.6145	1.62099
	10.6154	1.62196
	10.6162	1.62306
	10.617	1.62461
	10.6179	1.62609
	10.6187	1.62788
	10.6195	1.63014
	10.6204	1.63267
	10.6212	1.63479
	10.622	1.63636
	10.6229	1.63857
	10.6237	1.64048
	10.6245	1.64197
	10.6254	1.64349
	10.6262	1.64552
	10.627	1.64674
	10.6279	1.64729
	10.6287	1.64888
	10.6295	1.65105
	10.6304	1.65271
	10.6312	1.65365
	10.632	1.65499
	10.6329	1.65644
	10.6337	1.65737
	10.6345	1.65864
	10.6354	1.66034
	10.6362	1.66163
	10.637	1.66336
	10.6378	1.66495
	10.6387	1.66636
	10.6395	1.66744
	10.6403	1.66887
	10.6412	1.67025
	10.642	1.67138
	10.6428	1.67201
	10.6437	1.67312
	10.6445	1.67555
	10.6453	1.67742
	10.6462	1.67904
	10.647	1.68076
	10.6478	1.6826
	10.6487	1.6834
	10.6495	1.68422
	10.6503	1.68523
	10.6512	1.68621
	10.652	1.68796
	10.6528	1.68927
	10.6537	1.68967
	10.6545	1.69104
	10.6553	1.6926
	10.6562	1.69432
	10.657	1.69704
	10.6578	1.70001
	10.6587	1.70243
	10.6595	1.70418
	10.6603	1.70476
	10.6612	1.70503
	10.662	1.70596
	10.6628	1.70706
	10.6636	1.70863
	10.6645	1.7097
	10.6653	1.71076
	10.6661	1.71277
	10.667	1.71419
	10.6678	1.71433
	10.6686	1.71553
	10.6695	1.71778
	10.6703	1.71929
	10.6711	1.72037
	10.672	1.7211
	10.6728	1.72237
	10.6736	1.72412
	10.6745	1.72586
	10.6753	1.72769
	10.6761	1.72899
	10.677	1.72977
	10.6778	1.73113
	10.6786	1.73251
	10.6795	1.73399
	10.6803	1.73556
	10.6811	1.73735
	10.682	1.73929
	10.6828	1.74108
	10.6836	1.74263
	10.6845	1.74373
	10.6853	1.74485
	10.6861	1.74658
	10.6869	1.74805
	10.6878	1.7492
	10.6886	1.75088
	10.6894	1.75307
	10.6903	1.7555
	10.6911	1.75764
	10.6919	1.75985
	10.6928	1.7617
	10.6936	1.7635
	10.6944	1.76578
	10.6953	1.76768
	10.6961	1.76968
	10.6969	1.77134
	10.6978	1.77357
	10.6986	1.7749
	10.6994	1.77595
	10.7003	1.77738
	10.7011	1.77966
	10.7019	1.78249
	10.7028	1.78478
	10.7036	1.78621
	10.7044	1.7873
	10.7053	1.78864
	10.7061	1.79064
	10.7069	1.79275
	10.7078	1.79441
	10.7086	1.79621
	10.7094	1.79836
	10.7103	1.80001
	10.7111	1.80181
	10.7119	1.80377
	10.7127	1.80554
	10.7136	1.80816
	10.7144	1.81121
	10.7152	1.81357
	10.7161	1.81506
	10.7169	1.81647
	10.7177	1.81842
	10.7186	1.82079
	10.7194	1.82337
	10.7202	1.82551
	10.7211	1.82766
	10.7219	1.82974
	10.7227	1.83228
	10.7236	1.83487
	10.7244	1.83692
	10.7252	1.83935
	10.7261	1.84266
	10.7269	1.84597
	10.7277	1.84841
	10.7286	1.85031
	10.7294	1.85241
	10.7302	1.85419
	10.7311	1.85562
	10.7319	1.85716
	10.7327	1.85894
	10.7336	1.86043
	10.7344	1.86223
	10.7352	1.86418
	10.7361	1.86558
	10.7369	1.86697
	10.7377	1.86865
	10.7385	1.87065
	10.7394	1.87247
	10.7402	1.87428
	10.741	1.87607
	10.7419	1.87763
	10.7427	1.87866
	10.7435	1.87966
	10.7444	1.8815
	10.7452	1.88427
	10.746	1.88738
	10.7469	1.88969
	10.7477	1.89168
	10.7485	1.89369
	10.7494	1.89569
	10.7502	1.89785
	10.751	1.89989
	10.7519	1.90182
	10.7527	1.90326
	10.7535	1.90531
	10.7544	1.90804
	10.7552	1.91016
	10.756	1.91187
	10.7569	1.91356
	10.7577	1.91518
	10.7585	1.91739
	10.7594	1.91987
	10.7602	1.92176
	10.761	1.92355
	10.7618	1.92565
	10.7627	1.92693
	10.7635	1.92837
	10.7643	1.93016
	10.7652	1.93168
	10.766	1.93291
	10.7668	1.93406
	10.7677	1.93599
	10.7685	1.93799
	10.7693	1.94009
	10.7702	1.9414
	10.771	1.94341
	10.7718	1.94603
	10.7727	1.94832
	10.7735	1.95077
	10.7743	1.95279
	10.7752	1.9553
	10.776	1.95808
	10.7768	1.96005
	10.7777	1.96188
	10.7785	1.96404
	10.7793	1.96576
	10.7802	1.9672
	10.781	1.96907
	10.7818	1.97034
	10.7827	1.97205
	10.7835	1.97402
	10.7843	1.97619
	10.7852	1.97847
	10.786	1.98062
	10.7868	1.98268
	10.7876	1.98397
	10.7885	1.98612
	10.7893	1.98849
	10.7901	1.99042
	10.791	1.99247
	10.7918	1.99438
	10.7926	1.9968
	10.7935	1.99977
	10.7943	2.00166
	10.7951	2.00296
	10.796	2.00417
	10.7968	2.00595
	10.7976	2.00769
	10.7985	2.00989
	10.7993	2.01291
	10.8001	2.01579
	10.801	2.01854
	10.8018	2.02099
	10.8026	2.02274
	10.8035	2.02529
	10.8043	2.02824
	10.8051	2.03049
	10.806	2.03207
	10.8068	2.03401
	10.8076	2.0366
	10.8085	2.03872
	10.8093	2.04051
	10.8101	2.04223
	10.811	2.04386
	10.8118	2.04726
	10.8126	2.04951
	10.8134	2.05129
	10.8143	2.05341
	10.8151	2.0556
	10.8159	2.05836
	10.8168	2.06064
	10.8176	2.06209
	10.8184	2.06398
	10.8193	2.06692
	10.8201	2.06964
	10.8209	2.07273
	10.8218	2.07646
	10.8226	2.07878
	10.8234	2.08176
	10.8243	2.08468
	10.8251	2.08723
	10.8259	2.08984
	10.8268	2.09279
	10.8276	2.09485
	10.8284	2.09671
	10.8293	2.09912
	10.8301	2.10109
	10.8309	2.10267
	10.8318	2.10472
	10.8326	2.10682
	10.8334	2.10888
	10.8343	2.11167
	10.8351	2.11365
	10.8359	2.11636
	10.8367	2.11952
	10.8376	2.12239
	10.8384	2.12434
	10.8392	2.12576
	10.8401	2.12656
	10.8409	2.12752
	10.8417	2.12874
	10.8426	2.13018
	10.8434	2.13171
	10.8442	2.13356
	10.8451	2.13504
	10.8459	2.13721
	10.8467	2.13948
	10.8476	2.14174
	10.8484	2.14368
	10.8492	2.14589
	10.8501	2.14897
	10.8509	2.15145
	10.8517	2.15353
	10.8526	2.15488
	10.8534	2.15597
	10.8542	2.15813
	10.8551	2.16072
	10.8559	2.16254
	10.8567	2.16445
	10.8576	2.16616
	10.8584	2.16807
	10.8592	2.17059
	10.8601	2.17285
	10.8609	2.17452
	10.8617	2.17682
	10.8625	2.17894
	10.8634	2.18064
	10.8642	2.18304
	10.865	2.18506
	10.8659	2.18645
	10.8667	2.18776
	10.8675	2.18891
	10.8684	2.1902
	10.8692	2.19296
	10.87	2.19581
	10.8709	2.19823
	10.8717	2.20027
	10.8725	2.20331
	10.8734	2.20644
	10.8742	2.20806
	10.875	2.21067
	10.8759	2.2125
	10.8767	2.21504
	10.8775	2.21701
	10.8784	2.21888
	10.8792	2.22161
	10.88	2.22377
	10.8809	2.22694
	10.8817	2.23098
	10.8825	2.2336
	10.8834	2.23679
	10.8842	2.24007
	10.885	2.2433
	10.8858	2.24688
	10.8867	2.25042
	10.8875	2.25242
	10.8883	2.25507
	10.8892	2.258
	10.89	2.26117
	10.8908	2.26367
	10.8917	2.26607
	10.8925	2.26808
	10.8933	2.27002
	10.8942	2.27227
	10.895	2.27513
	10.8958	2.27736
	10.8967	2.27945
	10.8975	2.28281
	10.8983	2.2859
	10.8992	2.28889
	10.9	2.29109
	10.9008	2.29323
	10.9017	2.29556
	10.9025	2.29788
	10.9033	2.29999
	10.9042	2.30127
	10.905	2.30349
	10.9058	2.30502
	10.9067	2.30719
	10.9075	2.31018
	10.9083	2.31358
	10.9092	2.31724
	10.91	2.31952
	10.9108	2.32137
	10.9116	2.32324
	10.9125	2.32549
	10.9133	2.32814
	10.9141	2.32996
	10.915	2.33093
	10.9158	2.33315
	10.9166	2.3349
	10.9175	2.33658
	10.9183	2.339
	10.9191	2.34208
	10.92	2.34499
	10.9208	2.34761
	10.9216	2.34975
	10.9225	2.35177
	10.9233	2.35331
	10.9241	2.35622
	10.925	2.35881
	10.9258	2.36107
	10.9266	2.36284
	10.9275	2.36467
	10.9283	2.36549
	10.9291	2.36666
	10.93	2.36885
	10.9308	2.37022
	10.9316	2.37235
	10.9325	2.37438
	10.9333	2.37512
	10.9341	2.37765
	10.935	2.38065
	10.9358	2.38363
	10.9366	2.38548
	10.9374	2.38825
	10.9383	2.39028
	10.9391	2.39181
	10.9399	2.39344
	10.9408	2.39524
	10.9416	2.39819
	10.9424	2.40068
	10.9433	2.4029
	10.9441	2.40564
	10.9449	2.40809
	10.9458	2.41089
	10.9466	2.41325
	10.9474	2.41655
	10.9483	2.42035
	10.9491	2.42306
	10.9499	2.42516
	10.9508	2.42636
	10.9516	2.42887
	10.9524	2.4319
	10.9533	2.43469
	10.9541	2.43731
	10.9549	2.43971
	10.9558	2.44224
	10.9566	2.44595
	10.9574	2.4489
	10.9583	2.4514
	10.9591	2.45385
	10.9599	2.45623
	10.9608	2.45806
	10.9616	2.46
	10.9624	2.46205
	10.9632	2.46491
	10.9641	2.46809
	10.9649	2.47122
	10.9657	2.47421
	10.9666	2.4762
	10.9674	2.4783
	10.9682	2.48132
	10.9691	2.48292
	10.9699	2.48576
	10.9707	2.49005
	10.9716	2.49289
	10.9724	2.49618
	10.9732	2.49782
	10.9741	2.50005
	10.9749	2.50359
	10.9757	2.50561
	10.9766	2.50872
	10.9774	2.51146
	10.9782	2.51536
	10.9791	2.51849
	10.9799	2.52158
	10.9807	2.52479
	10.9816	2.52825
	10.9824	2.53185
	10.9832	2.53488
	10.9841	2.53759
	10.9849	2.54052
	10.9857	2.54322
	10.9865	2.54654
	10.9874	2.54968
	10.9882	2.55143
	10.989	2.55573
	10.9899	2.55767
	10.9907	2.56018
	10.9915	2.56347
	10.9924	2.56692
	10.9932	2.56963
	10.994	2.5715
	10.9949	2.5745
	10.9957	2.57689
	10.9965	2.57854
	10.9974	2.58097
	10.9982	2.58391
	10.999	2.58698
	10.9999	2.58995
	11.0007	2.59238
	11.0015	2.59522
	11.0024	2.59765
	11.0032	2.60027
	11.004	2.60411
	11.0049	2.60738
	11.0057	2.60907
	11.0065	2.61218
	11.0074	2.61515
	11.0082	2.61836
	11.009	2.62048
	11.0099	2.62283
	11.0107	2.62689
	11.0115	2.63061
	11.0123	2.6322
	11.0132	2.63484
	11.014	2.63887
	11.0148	2.64272
	11.0157	2.64605
	11.0165	2.6488
	11.0173	2.65185
	11.0182	2.65419
	11.019	2.65665
	11.0198	2.65911
	11.0207	2.66198
	11.0215	2.66547
	11.0223	2.6679
	11.0232	2.67088
	11.024	2.673
	11.0248	2.6754
	11.0257	2.67879
	11.0265	2.68146
	11.0273	2.68456
	11.0282	2.68695
	11.029	2.69009
	11.0298	2.69369
	11.0307	2.69522
	11.0315	2.6974
	11.0323	2.7012
	11.0332	2.70453
	11.034	2.70839
	11.0348	2.71187
	11.0356	2.7151
	11.0365	2.7173
	11.0373	2.7207
	11.0381	2.7248
	11.039	2.72822
	11.0398	2.731
	11.0406	2.73384
	11.0415	2.73637
	11.0423	2.73975
	11.0431	2.7424
	11.044	2.74616
	11.0448	2.74936
	11.0456	2.75114
	11.0465	2.75361
	11.0473	2.75773
	11.0481	2.7602
	11.049	2.76254
	11.0498	2.76515
	11.0506	2.76872
	11.0515	2.77099
	11.0523	2.77355
	11.0531	2.7757
	11.054	2.77921
	11.0548	2.7825
	11.0556	2.78547
	11.0565	2.78889
	11.0573	2.79168
	11.0581	2.79577
	11.059	2.79938
	11.0598	2.80271
	11.0606	2.80662
	11.0614	2.80991
	11.0623	2.81272
	11.0631	2.81562
	11.0639	2.81926
	11.0648	2.82136
	11.0656	2.82404
	11.0664	2.8274
	11.0673	2.82981
	11.0681	2.833
	11.0689	2.83602
	11.0698	2.83972
	11.0706	2.84169
	11.0714	2.84464
	11.0723	2.84822
	11.0731	2.85181
	11.0739	2.85357
	11.0748	2.85586
	11.0756	2.85717
	11.0764	2.8596
	11.0773	2.86332
	11.0781	2.86705
	11.0789	2.8694
	11.0798	2.87247
	11.0806	2.87616
	11.0814	2.87957
	11.0823	2.88249
	11.0831	2.88549
	11.0839	2.88939
	11.0847	2.893
	11.0856	2.8958
	11.0864	2.89938
	11.0872	2.90345
	11.0881	2.90674
	11.0889	2.90995
	11.0897	2.91281
	11.0906	2.91533
	11.0914	2.91761
	11.0922	2.92076
	11.0931	2.92398
	11.0939	2.92734
	11.0947	2.93042
	11.0956	2.93317
	11.0964	2.93652
	11.0972	2.93881
	11.0981	2.94195
	11.0989	2.94524
	11.0997	2.94797
	11.1006	2.95034
	11.1014	2.95273
	11.1022	2.95607
	11.1031	2.95971
	11.1039	2.96347
	11.1047	2.96622
	11.1056	2.96881
	11.1064	2.97129
	11.1072	2.97421
	11.1081	2.97629
	11.1089	2.97959
	11.1097	2.98246
	11.1105	2.98565
	11.1114	2.98875
	11.1122	2.99247
	11.113	2.99561
	11.1139	2.99979
	11.1147	3.00341
	11.1155	3.00806
	11.1164	3.01161
	11.1172	3.0153
	11.118	3.01859
	11.1189	3.0204
	11.1197	3.02267
	11.1205	3.02641
	11.1214	3.02975
	11.1222	3.03239
	11.123	3.03586
	11.1239	3.0391
	11.1247	3.04186
	11.1255	3.04449
	11.1264	3.0479
	11.1272	3.05149
	11.128	3.05491
	11.1289	3.05688
	11.1297	3.05876
	11.1305	3.06146
	11.1314	3.0652
	11.1322	3.06886
	11.133	3.07237
	11.1339	3.07624
	11.1347	3.08055
	11.1355	3.08371
	11.1363	3.08687
	11.1372	3.09094
	11.138	3.09428
	11.1388	3.09724
	11.1397	3.10097
	11.1405	3.10434
	11.1413	3.10858
	11.1422	3.11255
	11.143	3.1163
	11.1438	3.11911
	11.1447	3.12203
	11.1455	3.12557
	11.1463	3.12871
	11.1472	3.13161
	11.148	3.13538
	11.1488	3.13972
	11.1497	3.14439
	11.1505	3.14773
	11.1513	3.15114
	11.1522	3.15463
	11.153	3.15789
	11.1538	3.16143
	11.1547	3.16486
	11.1555	3.16777
	11.1563	3.1707
	11.1572	3.17327
	11.158	3.17698
	11.1588	3.17992
	11.1596	3.18344
	11.1605	3.18767
	11.1613	3.19203
	11.1621	3.19588
	11.163	3.19969
	11.1638	3.20316
	11.1646	3.20616
	11.1655	3.20991
	11.1663	3.21485
	11.1671	3.219
	11.168	3.22213
	11.1688	3.2255
	11.1696	3.22835
	11.1705	3.23238
	11.1713	3.23681
	11.1721	3.24003
	11.173	3.2424
	11.1738	3.24618
	11.1746	3.25082
	11.1755	3.25387
	11.1763	3.25759
	11.1771	3.26171
	11.178	3.26601
	11.1788	3.26968
	11.1796	3.27414
	11.1805	3.27775
	11.1813	3.28037
	11.1821	3.28393
	11.183	3.28671
	11.1838	3.29026
	11.1846	3.29422
	11.1854	3.29799
	11.1863	3.3013
	11.1871	3.30411
	11.1879	3.30805
	11.1888	3.31247
	11.1896	3.31647
	11.1904	3.32028
	11.1913	3.32315
	11.1921	3.32719
	11.1929	3.33138
	11.1938	3.33526
	11.1946	3.33931
	11.1954	3.34314
	11.1963	3.34697
	11.1971	3.35027
	11.1979	3.35348
	11.1988	3.35701
	11.1996	3.36076
	11.2004	3.36563
	11.2013	3.36965
	11.2021	3.3734
	11.2029	3.37715
	11.2038	3.38108
	11.2046	3.38454
	11.2054	3.38843
	11.2063	3.39253
	11.2071	3.39648
	11.2079	3.40006
	11.2088	3.40354
	11.2096	3.40685
	11.2104	3.40986
	11.2112	3.41408
	11.2121	3.4179
	11.2129	3.42187
	11.2137	3.42571
	11.2146	3.43069
	11.2154	3.43552
	11.2162	3.43913
	11.2171	3.44314
	11.2179	3.4459
	11.2187	3.44877
	11.2196	3.45161
	11.2204	3.45473
	11.2212	3.45789
	11.2221	3.46244
	11.2229	3.46749
	11.2237	3.47157
	11.2246	3.4745
	11.2254	3.47649
	11.2262	3.47954
	11.2271	3.48405
	11.2279	3.48856
	11.2287	3.49324
	11.2296	3.49749
	11.2304	3.50235
	11.2312	3.50641
	11.2321	3.50933
	11.2329	3.51323
	11.2337	3.51691
	11.2346	3.52066
	11.2354	3.52435
	11.2362	3.5277
	11.237	3.53129
	11.2379	3.53509
	11.2387	3.5393
	11.2395	3.54404
	11.2404	3.54848
	11.2412	3.55224
	11.242	3.55556
	11.2429	3.55929
	11.2437	3.56268
	11.2445	3.56609
	11.2454	3.57035
	11.2462	3.57429
	11.247	3.57804
	11.2479	3.58229
	11.2487	3.58623
	11.2495	3.59044
	11.2504	3.59465
	11.2512	3.59843
	11.252	3.60278
	11.2529	3.60683
	11.2537	3.61042
	11.2545	3.61381
	11.2554	3.61801
	11.2562	3.62191
	11.257	3.62545
	11.2579	3.62913
	11.2587	3.63309
	11.2595	3.6374
	11.2603	3.64163
	11.2612	3.64574
	11.262	3.64974
	11.2628	3.65377
	11.2637	3.65723
	11.2645	3.66002
	11.2653	3.66375
	11.2662	3.66829
	11.267	3.67322
	11.2678	3.67768
	11.2687	3.6816
	11.2695	3.68542
	11.2703	3.68886
	11.2712	3.69271
	11.272	3.69611
	11.2728	3.69986
	11.2737	3.7045
	11.2745	3.70939
	11.2753	3.7134
	11.2762	3.71765
	11.277	3.72207
	11.2778	3.72643
	11.2787	3.73042
	11.2795	3.73437
	11.2803	3.73833
	11.2812	3.74192
	11.282	3.74602
	11.2828	3.74996
	11.2836	3.75456
	11.2845	3.75834
	11.2853	3.76331
	11.2861	3.76789
	11.287	3.77159
	11.2878	3.77629
	11.2886	3.78016
	11.2895	3.78343
	11.2903	3.78663
	11.2911	3.78994
	11.292	3.79377
	11.2928	3.79831
	11.2936	3.80317
	11.2945	3.80783
	11.2953	3.8123
	11.2961	3.81745
	11.297	3.82206
	11.2978	3.82586
	11.2986	3.83009
	11.2995	3.83421
	11.3003	3.83874
	11.3011	3.84348
	11.302	3.84846
	11.3028	3.85322
	11.3036	3.85799
	11.3045	3.86249
	11.3053	3.86695
	11.3061	3.87238
	11.307	3.87733
	11.3078	3.8816
	11.3086	3.88576
	11.3094	3.88975
	11.3103	3.89398
	11.3111	3.89847
	11.3119	3.90322
	11.3128	3.90747
	11.3136	3.91166
	11.3144	3.91687
	11.3153	3.92156
	11.3161	3.92604
	11.3169	3.93116
	11.3178	3.93617
	11.3186	3.94048
	11.3194	3.94384
	11.3203	3.94794
	11.3211	3.9529
	11.3219	3.95729
	11.3228	3.96127
	11.3236	3.96535
	11.3244	3.96918
	11.3253	3.97315
	11.3261	3.97791
	11.3269	3.98229
	11.3278	3.9866
	11.3286	3.99154
	11.3294	3.99605
	11.3303	4.00085
	11.3311	4.00585
	11.3319	4.01126
	11.3328	4.01583
	11.3336	4.02005
	11.3344	4.02434
	11.3352	4.02841
	11.3361	4.03266
	11.3369	4.03731
	11.3377	4.04137
	11.3386	4.0465
	11.3394	4.05152
	11.3402	4.05586
	11.3411	4.06009
	11.3419	4.06347
	11.3427	4.06735
	11.3436	4.07132
	11.3444	4.07562
	11.3452	4.08067
	11.3461	4.08575
	11.3469	4.09118
	11.3477	4.09544
	11.3486	4.09967
	11.3494	4.10484
	11.3502	4.11006
	11.3511	4.1153
	11.3519	4.12027
	11.3527	4.12515
	11.3536	4.12987
	11.3544	4.1347
	11.3552	4.13928
	11.3561	4.14316
	11.3569	4.14769
	11.3577	4.15255
	11.3585	4.15653
	11.3594	4.16094
	11.3602	4.16582
	11.361	4.17096
	11.3619	4.17617
	11.3627	4.18117
	11.3635	4.18607
	11.3644	4.19126
	11.3652	4.19656
	11.366	4.20149
	11.3669	4.2062
	11.3677	4.21108
	11.3685	4.21606
	11.3694	4.2212
	11.3702	4.22616
	11.371	4.23126
	11.3719	4.23669
	11.3727	4.24182
	11.3735	4.24663
	11.3744	4.25119
	11.3752	4.25626
	11.376	4.26209
	11.3769	4.26775
	11.3777	4.27245
	11.3785	4.27712
	11.3794	4.28243
	11.3802	4.28743
	11.381	4.29242
	11.3819	4.29806
	11.3827	4.30379
	11.3835	4.30969
	11.3843	4.31523
	11.3852	4.32099
	11.386	4.3261
	11.3868	4.33054
	11.3877	4.33492
	11.3885	4.33986
	11.3893	4.34494
	11.3902	4.34953
	11.391	4.35388
	11.3918	4.35841
	11.3927	4.36387
	11.3935	4.3687
	11.3943	4.37344
	11.3952	4.37811
	11.396	4.38217
	11.3968	4.38679
	11.3977	4.3918
	11.3985	4.39641
	11.3993	4.40136
	11.4002	4.40641
	11.401	4.41147
	11.4018	4.41623
	11.4027	4.42159
	11.4035	4.42701
	11.4043	4.43156
	11.4052	4.4368
	11.406	4.44109
	11.4068	4.44613
	11.4077	4.45183
	11.4085	4.45792
	11.4093	4.46225
	11.4101	4.46678
	11.411	4.47084
	11.4118	4.47562
	11.4126	4.48071
	11.4135	4.4851
	11.4143	4.48985
	11.4151	4.49482
	11.416	4.50044
	11.4168	4.50575
	11.4176	4.51073
	11.4185	4.51551
	11.4193	4.521
	11.4201	4.52617
	11.421	4.53115
	11.4218	4.53623
	11.4226	4.54102
	11.4235	4.54586
	11.4243	4.55075
	11.4251	4.55585
	11.426	4.56136
	11.4268	4.56628
	11.4276	4.57086
	11.4285	4.57626
	11.4293	4.58154
	11.4301	4.58649
	11.431	4.59102
	11.4318	4.59702
	11.4326	4.60237
	11.4335	4.60782
	11.4343	4.61301
	11.4351	4.61794
	11.4359	4.62292
	11.4368	4.62821
	11.4376	4.63364
	11.4384	4.63881
	11.4393	4.64379
	11.4401	4.64865
	11.4409	4.65327
	11.4418	4.65857
	11.4426	4.66405
	11.4434	4.66927
	11.4443	4.67418
	11.4451	4.67937
	11.4459	4.68437
	11.4468	4.68996
	11.4476	4.69644
	11.4484	4.70214
	11.4493	4.70682
	11.4501	4.71152
	11.4509	4.71705
	11.4518	4.72266
	11.4526	4.72981
	11.4534	4.73588
	11.4543	4.74116
	11.4551	4.74667
	11.4559	4.75189
	11.4568	4.75725
	11.4576	4.763
	11.4584	4.76858
	11.4592	4.77327
	11.4601	4.77856
	11.4609	4.78433
	11.4617	4.79076
	11.4626	4.7968
	11.4634	4.80243
	11.4642	4.8086
	11.4651	4.81397
	11.4659	4.81968
	11.4667	4.82609
	11.4676	4.83204
	11.4684	4.83732
	11.4692	4.84249
	11.4701	4.84729
	11.4709	4.85271
	11.4717	4.85875
	11.4726	4.86555
	11.4734	4.87077
	11.4742	4.87661
	11.4751	4.883
	11.4759	4.88908
	11.4767	4.89504
	11.4776	4.90046
	11.4784	4.90571
	11.4792	4.91214
	11.4801	4.91822
	11.4809	4.92406
	11.4817	4.9303
	11.4826	4.93694
	11.4834	4.94309
	11.4842	4.94905
	11.485	4.95523
	11.4859	4.96157
	11.4867	4.96821
	11.4875	4.97518
	11.4884	4.98133
	11.4892	4.98691
	11.49	4.99272
	11.4909	4.99916
	11.4917	5.00592
	11.4925	5.01204
	11.4934	5.01782
	11.4942	5.02337
	11.495	5.02892
	11.4959	5.03444
	11.4967	5.03994
	11.4975	5.04529
	11.4984	5.05108
	11.4992	5.05715
	11.5	5.06407
	11.5009	5.07084
	11.5017	5.0765
	11.5025	5.0824
	11.5034	5.08824
	11.5042	5.09365
	11.505	5.09912
	11.5059	5.10471
	11.5067	5.11121
	11.5075	5.11761
	11.5083	5.12315
	11.5092	5.12795
	11.51	5.13408
	11.5108	5.14122
	11.5117	5.14787
	11.5125	5.15359
	11.5133	5.15928
	11.5142	5.16429
	11.515	5.16966
	11.5158	5.17562
	11.5167	5.18178
	11.5175	5.1875
	11.5183	5.19309
	11.5192	5.19997
	11.52	5.20695
	11.5208	5.21325
	11.5217	5.21883
	11.5225	5.22493
	11.5233	5.23107
	11.5242	5.23724
	11.525	5.24369
	11.5258	5.24959
	11.5267	5.25572
	11.5275	5.26205
	11.5283	5.26814
	11.5292	5.27343
	11.53	5.27893
	11.5308	5.28549
	11.5317	5.29179
	11.5325	5.2981
	11.5333	5.30344
	11.5341	5.30952
	11.535	5.31571
	11.5358	5.32145
	11.5366	5.32767
	11.5375	5.33441
	11.5383	5.34172
	11.5391	5.34893
	11.54	5.3558
	11.5408	5.3616
	11.5416	5.36672
	11.5425	5.3733
	11.5433	5.38052
	11.5441	5.38687
	11.545	5.39244
	11.5458	5.39784
	11.5466	5.40394
	11.5475	5.41005
	11.5483	5.41572
	11.5491	5.4221
	11.55	5.42882
	11.5508	5.4357
	11.5516	5.44216
	11.5525	5.44928
	11.5533	5.45692
	11.5541	5.46418
	11.555	5.47118
	11.5558	5.47835
	11.5566	5.48484
	11.5574	5.48979
	11.5583	5.49546
	11.5591	5.50174
	11.5599	5.50889
	11.5608	5.51494
	11.5616	5.52138
	11.5624	5.52787
	11.5633	5.53534
	11.5641	5.54257
	11.5649	5.54941
	11.5658	5.55603
	11.5666	5.5625
	11.5674	5.56986
	11.5683	5.57714
	11.5691	5.58387
	11.5699	5.58985
	11.5708	5.59607
	11.5716	5.60334
	11.5724	5.61122
	11.5733	5.61746
	11.5741	5.62343
	11.5749	5.63034
	11.5758	5.63689
	11.5766	5.64362
	11.5774	5.65138
	11.5783	5.6591
	11.5791	5.66622
	11.5799	5.67302
	11.5808	5.67963
	11.5816	5.68636
	11.5824	5.69292
	11.5832	5.70185
	11.5841	5.70783
	11.5849	5.71461
	11.5857	5.72103
	11.5866	5.72759
	11.5874	5.73494
	11.5882	5.74215
	11.5891	5.74934
	11.5899	5.75728
	11.5907	5.76402
	11.5916	5.77043
	11.5924	5.77776
	11.5932	5.78525
	11.5941	5.79117
	11.5949	5.79751
	11.5957	5.80434
	11.5966	5.81138
	11.5974	5.81834
	11.5982	5.82566
	11.5991	5.83298
	11.5999	5.8408
	11.6007	5.84804
	11.6016	5.85497
	11.6024	5.86302
	11.6032	5.86982
	11.6041	5.87699
	11.6049	5.88332
	11.6057	5.89002
	11.6066	5.89623
	11.6074	5.90337
	11.6082	5.9102
	11.609	5.91636
	11.6099	5.92308
	11.6107	5.9296
	11.6115	5.93619
	11.6124	5.94453
	11.6132	5.95124
	11.614	5.95779
	11.6149	5.96479
	11.6157	5.97248
	11.6165	5.97959
	11.6174	5.98728
	11.6182	5.99495
	11.619	6.00361
	11.6199	6.01006
	11.6207	6.01652
	11.6215	6.02273
	11.6224	6.03001
	11.6232	6.03695
	11.624	6.04375
	11.6249	6.05004
	11.6257	6.05798
	11.6265	6.06526
	11.6274	6.07255
	11.6282	6.08032
	11.629	6.08702
	11.6299	6.09516
	11.6307	6.10308
	11.6315	6.10961
	11.6323	6.11708
	11.6332	6.12554
	11.634	6.13274
	11.6348	6.13913
	11.6357	6.14658
	11.6365	6.15408
	11.6373	6.16228
	11.6382	6.17017
	11.639	6.17782
	11.6398	6.18551
	11.6407	6.19441
	11.6415	6.20151
	11.6423	6.20932
	11.6432	6.21718
	11.644	6.22415
	11.6448	6.23227
	11.6457	6.23918
	11.6465	6.24718
	11.6473	6.25577
	11.6482	6.26384
	11.649	6.27105
	11.6498	6.27894
	11.6507	6.28667
	11.6515	6.29263
	11.6523	6.30001
	11.6532	6.30756
	11.654	6.31498
	11.6548	6.32285
	11.6557	6.32974
	11.6565	6.33823
	11.6573	6.34611
	11.6581	6.35414
	11.659	6.36106
	11.6598	6.36831
	11.6606	6.37483
	11.6615	6.38262
[truncated: 7,617 more rows]

## Sheet: Supplementary Fig. 6
	Supplementary Fig. 6b						Supplementary Fig. 6c
	α-FLAG						α-HA
	Supplementary Fig. 6d						Supplementary Fig. 6e
	Luminescence (RLU)						Relative Signaling (Fold change over EV)
	EV	WT (1)	ΔCADH1-8 (2)	ΔCADH9-GAIN (3)	ADGRL3		EV	WT (1)	ΔCADH1-8 (2)	ΔCADH9-GAIN (3)	ADGRL3
	566	185	212	177	136		1.00461	0.328364	0.376287	0.314164	0.241392
	601	225	207	180	177		1.06674	0.399361	0.367412	0.319489	0.314164
	559	225	214	141	173		0.99219	0.399361	0.379837	0.250266	0.307064
	572	218	229	147	151		1.01526	0.386936	0.406461	0.260916	0.268016
	519	193	180	173	134		0.921193	0.342563	0.319489	0.307064	0.237842
							1.06364	0.34853	0.124045	0.731775	0.541541
							1.05485	0.211988	0.263828	0.807221	0.396667
							1.00393	0.225874	0.299931	0.603101	0.51377
							0.954409	0.315205	0.52349	0.810461	0.59153
							0.853506	0.325388	0.576255	0.61421	0.661421
							1.06966	0.299931	0.634112	0.646147	0.632724
							1.01763	0.435665	0.600973	0.512358	0.477395
							1.09593	0.380885	0.55296	0.438082	0.405697
							1.05388	0.393935	0.495763	0.445171	0.451938
							0.912899	0.355267	0.549093	0.0562305	0.503496
							0.919666	0.414236	0.525247	0.412625	0.174331
	Supplementary Fig. 6h
	Aggregation Index (%)
	EV/EV	ADGRL3/TEN2	CELSR1/CELSR1	CELSR2/CELSR2	CELSR1/CELSR2
	2	41	29	24	37
	4	51	29	31	40
	5	54	30	34	41
	5	57	40	38	42
Ca2+	5	61	46	46	44
	6			48	46
	7				49
	8				51
	9				51
	10				55
	1	37	2	1	1
	2	39	3	2	1
	2	44	4	3	1
	3	57	4	6	3
EGTA	3	53	9		3
	4				4
	5
	7
	9
	11

## Sheet: Supplementary Fig. 7
	Supplementary Fig. 7d							Supplementary Fig. 7d
	Luminescence (RLU)							Relative Signaling (Fold change over EV)
	EV	WT	LF	LY	NRY	ADGRL3		EV	WT	LF	LY	NRY	ADGRL3
	66	26	41	27	26	19		1.02158	1.02638	0.58753	0.784173	0.654676	0.352518
	74	26	47	28	27	18		1.05276	0.997602	0.642686	0.822542	0.805755	0.352518
	69	31	38	28	42	19		1.06235	0.836931	0.788969	0.968825	0.764988	0.290168
	67	33	33	39	31	14		0.954436	0.808153	0.892086	0.743405	0.932854	0.369305
	69	45	30	24	20	21		0.93765	0.872902	0.856115	0.796163	0.882494	0.357314
	71	21	21	18	37	22		0.971223	0.784173	0.767386	0.796163	0.920863	0.453237
								0.930818	0.855346	0.72956	0.628931	0.36478	0.477987
								1.01887	0.779874	0.578616	0.427673	0.591195	0.415094
								0.893082	0.754717	0.628931	0.54088	0.415094	0.440252
								1.0566	0.591195	0.528302	0.704403	0.402516	0.45283
								1.03145	0.792453	0.566038	0.503145	0.578616	0.477987
								1.06918	0.666667	0.515723	0.578616	0.54088	0.402516
								0.952381	0.37518	0.591631	0.38961	0.37518	0.27417
								1.06782	0.37518	0.678211	0.40404	0.38961	0.25974
								0.995671	0.44733	0.548341	0.40404	0.606061	0.27417
								0.966811	0.476191	0.476191	0.562771	0.44733	0.20202
								0.995671	0.649351	0.4329	0.34632	0.2886	0.30303
								1.02453	0.30303	0.30303	0.25974	0.53391	0.31746
